# Supplementary material for: Occurrence of refeeding syndrome in adults started on artificial nutrition support: prospective cohort study
Source: PubMed Central journal article supplement — BMJ Open. 2013 Jan 11;3(1):e002173. doi: 10.1136/bmjopen-2012-002173 (PMC3549252; doi:10.1136/bmjopen-2012-002173), 2013-01-11
Supplement: bmjopen-2012-002173.draft_revisions.pdf [file bmjopen-2012-002173.draft_revisions.pdf]

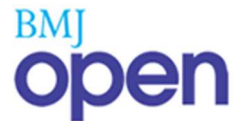

**Occurrence of refeeding syndrome in adults commenced on artificial nutrition and hydration: prospective cohort study.**

|                                 |                                                                                                                                                                                                                                                                                                                                                                                  |
|---------------------------------|----------------------------------------------------------------------------------------------------------------------------------------------------------------------------------------------------------------------------------------------------------------------------------------------------------------------------------------------------------------------------------|
| Journal:                        | <i>BMJ Open</i>                                                                                                                                                                                                                                                                                                                                                                  |
| Manuscript ID:                  | bmjopen-2012-002173                                                                                                                                                                                                                                                                                                                                                              |
| Article Type:                   | Research                                                                                                                                                                                                                                                                                                                                                                         |
| Date Submitted by the Author:   | 01-Oct-2012                                                                                                                                                                                                                                                                                                                                                                      |
| Complete List of Authors:       | Rio, Alan; King's College Hospital, Nutrition and Dietetics<br>Whelan, Kevin; Kings College Lonodn, Diabetes and Nutritional Sciences<br>Goff, Louise; Kings College Lonodn, Diabetes and Nutritional Sciences<br>Reidlinger, Dianne; Kings College Lonodn, Diabetes and Nutritional Sciences<br>Smeeton, Nigel; Kings College London, Imaging Sciences & Biomedical Engineering |
| <b>Primary Subject Heading</b>: | Nutrition and metabolism                                                                                                                                                                                                                                                                                                                                                         |
| Secondary Subject Heading:      | Medical management, Diagnostics, Evidence based practice                                                                                                                                                                                                                                                                                                                         |
| Keywords:                       | NUTRITION & DIETETICS, Nutritional support < GASTROENTEROLOGY, Eating disorders < PSYCHIATRY                                                                                                                                                                                                                                                                                     |
|                                 |                                                                                                                                                                                                                                                                                                                                                                                  |

SCHOLARONE™  
Manuscripts

1  
2 **Manuscript ID bmjopen-2012-000908**  
3

4 Title. Occurrence of refeeding syndrome in adults commenced on artificial nutrition and hydration:  
5  
6 prospective cohort study.  
7  
8  
9

10  
11  
12  
13 Alan Rio, Kevin Whelan, Louise Goff, Dianne Reidlinger, Nigel Smeeton.  
14

15  
16 Alan Rio, Nutrition and Dietetic Department, King's College Hospital, Denmark Hill, London, SE5 9RS,  
17  
18 UK. Kevin Whelan, King's College London, School of Medicine, Diabetes and Nutritional Sciences  
19  
20 Division, London, SE1 9NH, UK. Louise Goff, King's College London, School of Medicine, Diabetes and  
21  
22 Nutritional Sciences Division, London, SE1 9NH, UK. Dianne Reidlinger, King's College London,  
23  
24 School of Medicine, Diabetes and Nutritional Sciences Division, London, SE1 9NH, UK, Nigel Smeeton,  
25  
26 King's College London, Division of Imaging Sciences & Biomedical Engineering, London, SE1 7EH, UK.  
27  
28  
29  
30  
31  
32  
33

34 Correspondence to: A Rio, Alan.Rio.1@city.ac.uk  
35  
36  
37  
38  
39  
40  
41  
42  
43  
44  
45  
46  
47  
48  
49  
50  
51  
52  
53  
54  
55  
56  
57  
58  
59  
60

## Article Summary

### Article focus

Hypothesis: The risk factors for the refeeding syndrome are weak and cause unnecessary delay of nutrition.

Research question: Which risk factors reliably predict development of the refeeding syndrome?

### Key messages

- Refeeding syndrome is a complex constellation of major characteristics which requires a multi-facet diagnostic criteria.
- Refeeding syndrome is a rare, survivable phenomena that can occur despite identification of risk and hypocaloric nutritional treatment.
- Intravenous dextrose infusion prior to artificial nutrition can precipitate the refeeding syndrome.
- Starvation is the most reliable predictor for onset of the syndrome.

### Strengths and limitations of this study

The authors were not involved in the nutritional treatment, electrolyte supplementation or diagnosis of the refeeding syndrome. The diagnostic criteria enabled the authors to authenticate positive cases and omit borderline results. The main source of data loss was the excluded group which may potentially have contained participants who went on to develop the refeeding syndrome.

## Abstract

**Background** Refeeding syndrome is the metabolic response to excess nutrition in starved individuals characterised by severe intracellular electrolyte shifts, acute circulatory fluid overload and organ failure. It can occur during enteral, parenteral or oral feeding.

**Objective** To determine the occurrence of refeeding syndrome in adults commenced on artificial nutrition and hydration.

**Design** Prospective cohort study.

**Setting** Large, single site university teaching hospital. Recruitment period 2007-2009.

**Participants** 243 adults commenced on artificial nutrition and hydration for the first time during that admission recruited from wards and intensive care.

**Main outcome measures** Primary outcome: Occurrence of the refeeding syndrome. Secondary outcome: Sensitivity and specificity of the risk factors for predicting refeeding syndrome. Tertiary outcome: Mortality due to refeeding syndrome and all cause mortality.

**Results** 133 participants had risk factors and (2% 3/243) participants were diagnosed with the refeeding syndrome. Poor nutritional intake for more than 10 days, weight loss >15% prior to recruitment and a low serum magnesium level at baseline had sensitivity values of 66.7%. Specificity of risk factors for refeeding syndrome were >80% apart from weight loss of >15% which had a specificity of 59.1%. Only low baseline serum magnesium ( $p=0.021$ ) predicted refeeding syndrome; other independent variables were not significantly associated. There were no deaths attributable to the refeeding syndrome but (5.3% 13/243) participants died during the feeding period and (28% 68/243) died during the hospital admission.

## Conclusion

Refeeding syndrome was a rare, survivable phenomenon that occurred during hypocaloric feeding in participants identified at risk. Predictors for refeeding syndrome were starvation and low serum magnesium concentration. Intravenous carbohydrate infusion prior to artificial nutrition and hydration may have precipitated the onset of refeeding syndrome. The risk factors for predicting the syndrome were weak and may inadvertently have contributed to malnutrition.

## Introduction

Refeeding syndrome has been defined as severe fluid and electrolyte shifts in malnourished patients during oral, enteral or parenteral refeeding.<sup>1</sup> The key prerequisite for the syndrome is starvation with the earliest documented cases being prisoners of war.<sup>2</sup> In recent times refeeding syndrome has been confirmed in hunger strikers, individuals with anorexic nervosa and chronic alcoholics. The modern definition of refeeding syndrome is life threatening acute micronutrient deficiencies, fluid and electrolyte imbalance and disturbance of organ function and metabolic regulation resulting from over rapid or unbalanced nutrition support.<sup>3</sup> However, this definition is imprecise and lacks definitive electrolyte threshold values to confidently diagnose the refeeding syndrome.

The metabolic shift from starvation to feeding increases cellular uptake of glucose, potassium, phosphate and magnesium which lowers the serum concentration of these electrolytes.<sup>4</sup> The early signs of the refeeding syndrome are non specific but include severely low concentrations of serum phosphate, potassium and magnesium and if untreated can progress to acute circulatory fluid overload, respiratory compromise and cardiac failure.<sup>5</sup> Severe hypophosphataemia has been described as the hallmark of refeeding syndrome.

Guidelines for the prevention and treatment of refeeding syndrome advise identification of individuals at risk, controlled hypocaloric nutritional treatment and supplementary electrolytes.<sup>3</sup> However, not all individuals with risk factors for refeeding syndrome develop symptoms during nutritional repletion.<sup>6</sup> A potential consequence of adherence to these untested guidelines is the delay of adequate nutrition to undernourished individuals. We conducted a prospective cohort study to determine the occurrence of refeeding syndrome in adults commenced on artificial nutrition and hydration. Refeeding syndrome was confirmed using a three facet diagnostic criteria of severely low electrolyte concentrations, acute circulatory fluid overload and organ dysfunction.

## Methods

### Study design

This was a prospective cohort study conducted at a large, single site university teaching hospital. Criteria to determine risk of refeeding syndrome is displayed in Box 1. The risk factors were Body Mass Index (BMI) < 16 (kg/m<sup>2</sup>), unintentional weight loss >15% in the preceding three – six months, very little or no nutritional intake for more than 10 days and low levels of serum potassium, phosphate or magnesium prior to artificial nutrition and hydration. The three facet diagnostic criteria to confirm refeeding syndrome is displayed in Box 2. The criteria of severely low electrolytes, acute circulatory fluid overload and organ dysfunction included the major features of the syndrome. All three major characteristics occurring from the commencement of artificial nutrition and hydration were required to diagnose the syndrome. To avoid any potential bias the authors were not involved in nutritional treatment, electrolyte supplementation or the initial diagnosis of refeeding syndrome during the study period. The schematic for participant exclusion, recruitment and analysis is displayed in Flow chart 1.

### Sample size

The sample size was estimated from the reported prevalence of refeeding syndrome, defined as hypophosphataemia <0.4 mmol/L, to be 1 - 10%.<sup>7-8</sup> A cohort of 240 participants was anticipated to produce between 2 - 24 positive refeeding syndrome cases.

### Participants

Researchers were alerted of potential new participants by the medical teams who referred to the nutrition and dietetic department for commencement of artificial nutrition and hydration. Inclusion criteria were; adults >18 years of age commenced on artificial nutrition and hydration for the first time during that hospital admission. Exclusion criteria were; previous artificial nutrition and hydration during that admission, participants <18 years of age or failure to obtain consent/assent. Study participation was for the duration of artificial nutrition and hydration to a maximum of 15 consecutive days. Informed consent was obtained from participants or next of kin prior to recruitment. All participants were recruited within 48 hours of the commencement of artificial nutrition and hydration which included enteral and parenteral

1  
2 tube feeding. Energy prescriptions for each participant were estimated by the dietetic speciality who used  
3 stress related factors<sup>9</sup> or by body weight<sup>10</sup> calculations. The hospital nutrition policy for adults with risk  
4 factors for refeeding syndrome was 800 kcal day or 50% of estimated adult energy requirements.  
5  
6  
7

### 8 **Outcome measures**

9  
10 The primary outcome of interest in this study was the occurrence of refeeding syndrome. The medical  
11 team for each participant diagnosed refeeding syndrome based on severe serum electrolyte shifts of  
12 potassium, phosphate and magnesium. Severe shifts in serum electrolytes triggered an automatic  
13 electronic response on each participant's blood results. The normal hospital reference ranges were;  
14 potassium 3.5 – 5.0 mmol/L, phosphate 0.8 – 1.4 mmol/L and magnesium 0.7 – 1.00 mmol/L. The  
15 research team investigated each case and using the criteria shown in Box 2 confirmed the diagnosis. The  
16 secondary outcome was the sensitivity and specificity of the risk factors at predicting refeeding syndrome.  
17  
18 The tertiary outcome measure was mortality; due to refeeding syndrome and all cause mortality.  
19  
20  
21  
22  
23  
24  
25  
26  
27

### 28 **Data Collection**

29  
30 Baseline serum electrolyte concentrations were recorded within 24 hours of study enrolment then every  
31 third day for a maximum of 15 days during the period of artificial nutrition and hydration. Serum  
32 electrolytes were not recorded when artificial nutrition and hydration was stopped. Serum electrolyte  
33 concentrations were obtained from the hospital electronic in-patient system (iSoft, v1.0 Oxon, England).  
34  
35 The normal hospital adult serum reference ranges were potassium 3.5 – 5.0 mmol/L, phosphate 0.8 – 1.4  
36 mmol/L and magnesium 0.7 – 1.00 mmol/L. Body weight (kg) was measured using balance and digital  
37 scales accurate to within 0.1kg (Seca, 22089 Hamburg, Germany) wearing light indoor clothing. Body  
38 weight was not recorded in participants who were sedated or unconscious. Height (m) was recorded using  
39 measured or recalled data as appropriate. Body mass index ( $\text{kg/m}^2$ ) and percentage weight loss (normal  
40 body weight - current body weight/normal body weight x 100) were calculated. To determine which  
41 participants had poor nutritional intake prior to artificial nutrition and hydration, dietary caloric intake was  
42 calculated by a research assistant. Participants unable to provide a diet history the next of kin was  
43 interviewed, failing this retrospective food intake records were used.  
44  
45  
46  
47  
48  
49  
50  
51  
52  
53  
54  
55  
56  
57  
58  
59  
60

## Data Analysis

Descriptive statistics were performed on the cohort of 243 participants. All participants were classified at risk of refeeding syndrome risk or not at risk according to the diagnostic criteria displayed in Box 2. Predictor variables were transformed to binary categories representing whether or not refeeding syndrome was diagnosed. Sensitivity and specificity values for refeeding syndrome were calculated for each predictor based on the 243 participants with precision set at 70%. The refeeding syndrome outcomes were assessed using Fisher's exact test at the  $p < 0.05$  level. Participants with risk factors for refeeding syndrome were analysed as a subgroup of 133 participants. This subgroup was stratified dependent on baseline energy intake as; Group 1  $< 800$  kcal at baseline versus Group 2  $> 800$  kcal at baseline, Flow chart 1. There was no further analysis of the 110 participants who did not have risk factors for the syndrome. All data analysis was performed using SPSS version 17 (Chicago, IL, US).

## Results

Four hundred and eighty four participants were eligible to be recruited, displayed in Flow chart 1. A total of 243 participants were recruited median age 57.0 years (interquartile range 44.0 – 69.0), sex 130 (53.5%) men. There were 133 participants with risk factors for refeeding syndrome of which 68 were men. Recruitment locations were wards 153 (63.0%), high dependency unit 46 (18.9%) and intensive care 44 (18.1%), see Table 1. In total 212 (87.2%) participants received enteral, 23 (9.5%) participants parenteral and 8 (3.3%) received enteral/parenteral tube feeding. There were 2615 total feed days, median duration 13 days (interquartile range 6-15). A total of 2765 serum electrolyte results were recorded, 1014 for potassium, 1006 for phosphate and 745 for magnesium. Potassium was the most frequently supplemented electrolyte followed by magnesium. The total number of participants who received electrolyte supplementation were potassium 71, phosphate 49 and magnesium 52. Occurrence of moderate and severely low serum electrolyte concentration with mortality is displayed in Table 2. Mortality was not attributed to refeeding syndrome either during feeding (5.3%, 13/243) or hospital admission (28% 68/243). Cause of death in these participants was due to underlying disease with mortality by location; ward 45/153, high dependency unit 14/46 and intensive care 9/44.



1  
2 Three participants were diagnosed with refeeding syndrome, two participants developed borderline  
3 electrolyte depletion without acute circulatory fluid overload or organ dysfunction and 238 participants  
4 did not develop refeeding syndrome. The sensitivity and specificity values for the predictors of refeeding  
5 syndrome are shown in Table 3. Poor nutritional intake for more than 10 days, weight loss >15% prior to  
6 recruitment and a low serum magnesium level at baseline had sensitivity values of 66.7%. By contrast, all  
7 specificity values were high (>80%) apart from weight loss >15%, which had a specificity of 59.1%. Only  
8 low baseline serum magnesium (p=0.021) predicted refeeding syndrome; other independent variables  
9 were not significantly associated. The pre-existing risk factors for refeeding syndrome for Groups one and  
10 two are displayed in Table 4. Daily energy intake from artificial nutrition and hydration from baseline to  
11 day nine for Groups one and two are displayed in Table 5. Characteristics of the three participants  
12 diagnosed with refeeding syndrome are displayed in Table 6.

### 26 **Participant diagnosed with refeeding syndrome**

27 Participant X, a 48 year female who presented with confusion, bilateral leg weakness, alcohol withdrawal,  
28 poor nutritional intake with repeat vomiting for seven days, C2 fracture, translocation at C2/3 and high  
29 urinary ketones. The participant received two doses of intravenous Pabrinex® in 0.9% sodium chloride  
30 followed by 100 mg oral thiamine. Day two the patient received one litre of intravenous potassium  
31 chloride and two litres of 5% dextrose followed by enteral tube feeding. Day three serum phosphate was  
32 recorded at 0.33 mol/L and 500 ml intravenous polyfusor providing 50 mmol/L phosphate was infused  
33 over 12 hours. At day four the participant developed peripheral oedema with tachycardia and was  
34 transferred to the intensive care unit due to respiratory failure and acute circulatory fluid overload.

35  
36  
37  
38  
39  
40  
41  
42  
43  
44  
45  
46  
47  
48 Participant Y, a 23 year old female, with Crohn's disease and subtotal bowel colectomy presented with  
49 frontal occipital headaches radiating to neck with history of nausea, vomiting and weight loss of 26kg. At  
50 day 117 of admission a nasogastric tube was inserted due to poor nutritional intake. Nutrition was stopped  
51 within two hours due to vomiting and abdominal pain. The participant collapsed 24 hours later due to  
52 hypotension, hypothermia, dehydration and pseudo-bowel obstruction. The participant was transferred to  
53  
54  
55  
56  
57  
58  
59  
60

1  
2 the high dependency unit for fluid resuscitation. Intravenous 10% dextrose was commenced and a 16Fr  
3  
4 wide bore nasogastric tube was inserted for gastric drainage. Day two serum electrolytes levels were  
5  
6 potassium 3.2 mmol/L, phosphate 0.26 mmol/L, magnesium 0.55 mmol/L. Intravenous Polyfusor 500 ml  
7  
8 providing 100 mmol/l phosphate was commenced. The participant was transferred to the intensive care  
9  
10 unit, intubated and commenced on haemofiltration due to multi-organ failure.  
11  
12

13  
14  
15 Participant Z, a 31 year old female, with decompensated liver cirrhosis secondary to alcohol, with existing  
16  
17 chronic pancreatitis and opiate dependency with a weekly alcohol intake of 56 units was admitted to the  
18  
19 hepatology unit with abdominal pain, vomiting and dehydration. Usual body weight was 48kg, admission  
20  
21 dry weight was 40kg. Intravenous Pabrinex® was infused followed by one litre of 5% dextrose containing  
22  
23 20mmol/L potassium chloride. Oral thiamine 100 mg and vitamin B compound strong were prescribed.  
24  
25 The participant had a nasogastric tube inserted and artificial nutrition and hydration was commenced. At  
26  
27 day three serum electrolytes were potassium 2.5 mmol/L, phosphate 0.37 mmol/L, magnesium 0.56  
28  
29 mmol/L. The participant developed acute circulatory fluid overload, symptoms of tachycardia and  
30  
31 pneumonia. The participant was infused with Polyfusor 500 ml containing 100 mmol/L phosphate, a litre  
32  
33 of 5% glucose, 25mmol magnesium and repeat Pabrinex®.  
34  
35  
36

### 37 38 **Discussion**

39  
40 This study applied a three facet diagnostic criteria to confirm the occurrence of refeeding syndrome in  
41  
42 adults commenced on artificial nutrition and hydration. The three facet criteria provided unequivocal  
43  
44 confirmation of the major clinical characteristics in those participants who developed the essential features  
45  
46 of the syndrome. Occurrence of refeeding syndrome in participants with risk factors was 2% and was not  
47  
48 associated with mortality. The three major facets of the diagnostic criteria; severe serum electrolyte shifts,  
49  
50 acute circulatory fluid overload and organ dysfunction occurred in the three participants within 72 hours  
51  
52 of hypocaloric tube feeding. Two of these participants who developed respiratory failure and multi-organ  
53  
54 failure required admission to the intensive care unit whilst the third participant, who developed acute  
55  
56 circulatory fluid overload and tachycardia, was treated on the ward. The survival of these three  
57  
58  
59  
60

1  
2 participants represents advances in the medical management of severely malnourished individuals since  
3  
4 the first cases of refeeding syndrome were reported.<sup>2, 5</sup> This study does not support previous reports that  
5  
6 refeeding syndrome can be prevented by identification of risk and treatment with hypocaloric feeding. In  
7  
8 this study refeeding syndrome occurred in three participants who had been identified at risk and treated  
9  
10 with hypocaloric feeding. Factors distinct to the three refeeding cases were starvation and low baseline  
11  
12 serum magnesium concentration. Two of the three cases received intravenous pabrinex and B vitamins  
13  
14 prior to artificial nutrition and hydration which may have prevented Wernicke's encephalopathy but did  
15  
16 not prevent refeeding syndrome. The small number of refeeding cases in this study may have been due to  
17  
18 the medical teams having a policy of early electrolyte replacement. However, we suspect that the most  
19  
20 compelling reason for the low occurrence of refeeding syndrome in this study was that starvation was a  
21  
22 characteristic of only three participants. The analysis of the two subgroups showed strikingly similar  
23  
24 malnutrition profiles but substantially different energy intakes which exceeded guideline  
25  
26 recommendations. We interpret this to suggest that for refeeding syndrome to occur a predisposing factor  
27  
28 was required. The predisposing characteristic of the three confirmed cases in this study was starvation.  
29  
30 This interpretation is supported by our analysis of those participants who reported a short period of fasting  
31  
32 prior to artificial nutrition and experienced moderate falls in their serum electrolyte concentrations.  
33  
34  
35  
36

### 37 **Strengths and weaknesses of the study**

38  
39 The results of this study should be interpreted with caution. The study was not designed to assess the  
40  
41 mechanism of refeeding syndrome. The main strengths of the study were the cohort design, the diagnostic  
42  
43 criteria and the analysis of the risk factors. The results are applicable to an adult population who received  
44  
45 artificial nutrition and hydration. The occurrence of the syndrome in a general adult hospital population  
46  
47 treated with oral nutrition may produce different results. The most notable weakness of this study was that  
48  
49 only three cases of the syndrome occurred. This small number of refeeding cases limited the statistical  
50  
51 analyses that we could perform. The sensitivity values are thus limited to the three cases of the cohort and  
52  
53 to some extent the diagnostic criteria applied by the research team. The small number of refeeding  
54  
55 syndrome cases may have been due to the medical teams taking preventative actions to avoid the  
56  
57  
58  
59  
60

1  
2 syndrome. The electrolyte threshold values could be interpreted as too low to capture all cases. The  
3  
4 severely low electrolyte threshold values were obtained from a review of the evidence to enable  
5  
6 unequivocal confirmation of positive cases. This discreet approach was taken to avoid falsely including  
7  
8 participants with single, abnormal electrolyte concentrations. Whilst the evidence review was consistent  
9  
10 for severely low serum electrolyte concentrations we identified a lack of consensus on the electrolyte  
11  
12 threshold values to diagnose the syndrome. To avoid bias the authors were not involved in nutritional  
13  
14 treatment, electrolyte supplementation or the initial diagnosis of the syndrome. The most obvious source  
15  
16 of data loss was the excluded group which contained potentially 157 participants. We acknowledge that  
17  
18 this group may have contained participants who went on to develop the major characteristics of the  
19  
20 syndrome.  
21  
22  
23

### 24 **Interpretation**

25  
26 Occurrence of serum phosphate  $<0.5$  mmol/L in this study was 3% at day one and 6% at day three which  
27  
28 was higher than that reported in a general adult hospital population of 0.2% to 2%.<sup>7,8, 11</sup> The higher  
29  
30 occurrence of hypophosphataemia in this study may have been due to the cohort containing participants  
31  
32 recruited from the high dependency and intensive care units. Very few participants developed severe  
33  
34 electrolyte shifts although moderate serum concentrations of potassium, phosphate and magnesium  
35  
36 occurred. The interpretation of the moderate electrolyte shifts, without symptoms of the syndrome, was  
37  
38 cellular uptake of electrolytes in response to nutritional input. The subgroup analysis identified many  
39  
40 participants with risk factors for the syndrome. Hypocaloric nutritional treatment may have prevented  
41  
42 refeeding syndrome in some of these participants. However, the subgroup analysis revealed one group  
43  
44 received more energy sooner and for longer but did not develop symptoms. This finding supports our  
45  
46 interpretation that the risk factors<sup>3</sup> for predicting the syndrome are weak and the practice of hypocaloric  
47  
48 feeding may contribute to malnutrition.  
49  
50  
51  
52

53  
54  
55 The impact of intravenous dextrose infusion as a precipitating factor for refeeding syndrome in the three  
56  
57 cases cannot be under estimated. In starved individuals gluconeogenesis is the predominant metabolic  
58  
59  
60

1  
2 pathway for energy production. Infusion of intravenous dextrose in the three participants caused  
3 suppression of gluconeogenesis and an instant switch to glycolysis. This switch caused insulin to be  
4 released causing rapid cellular uptake of serum phosphate, potassium and magnesium electrolytes. We  
5 propose that the initial infusion of dextrose in the three starved participants was the causal agent that  
6 triggered the refeeding syndrome. Hypocaloric feeding failed to prevent refeeding syndrome in these three  
7 cases for one important reason, it continued the input of simple carbohydrates causing more insulin to be  
8 released. This explanation is supported by other studies where intravenous dextrose infusion was  
9 attributed to hypophosphataemia of  $<0.7$  mmol/L<sup>12</sup> which progressed to respiratory failure at serum  
10 phosphate concentration 0.2 mmol/L - 0.36 mmol/L.<sup>15-16</sup> The results of the present study indicate that  
11 dextrose infusion should be avoided in starved individuals who require fluid replacement and nutritional  
12 treatment. This finding that intravenous dextrose infusion acts as a precipitator for the refeeding syndrome  
13 requires further research.  
14  
15  
16  
17  
18  
19  
20  
21  
22  
23  
24  
25  
26  
27

### 28 **Comparison with other studies**

29  
30 The era of hypercaloric feeding in cachectic individuals was associated with cardiac abnormalities,<sup>17</sup>  
31 respiratory failure and death.<sup>5</sup> Two decades later controlled hypocaloric nutritional treatment and  
32 electrolyte supplementation prevented refeeding syndrome in eight prisoners who had been on hunger  
33 strike for 43 days.<sup>18</sup> Under controlled conditions hypocaloric nutritional treatment and intravenous  
34 Polfusor phosphate (25 mmol/L) over 12 hours and effervescent oral phosphate (16mmol) twice daily  
35 prevented serious complications associated with refeeding syndrome in a 30 year old male who endured  
36 44 days of self imposed starvation.<sup>19</sup> Refeeding syndrome was prevented in 29 anorexic nervosa  
37 participants given 500 to 2,000 mg phosphate daily.<sup>20</sup> The energy prescription was 1,900 kcal at day one  
38 and 2,200 kcal at day three yet moderate hypophosphataemia (0.31 - 0.8 mmol/L) did not occur. These  
39 varied studies reflect the increased awareness of the syndrome where serious complications and mortality  
40 can be avoided.<sup>21-22</sup> In the present study refeeding syndrome was a rare, survivable phenomenon that  
41 occurred in starved individuals who crucially were identified at risk and treated with hypocaloric  
42 nutrition.<sup>23</sup> However, intravenous dextrose infusion prior to artificial nutrition and hydration was a causal,  
43  
44  
45  
46  
47  
48  
49  
50  
51  
52  
53  
54  
55  
56  
57  
58  
59  
60

1  
2 precipitating factor for the onset of the syndrome.  
3

#### 4 **Other information**

5  
6 Funding; none declared.  
7

8  
9 Contributors: AR was responsible for the conception, design, initiation and overall co-ordination of the  
10 study: AR drafted the paper, is responsible for its intellectual content, interpretation and analysis of the  
11 results. KW was involved in the design of the study, interpretation of results and writing the manuscript.  
12  
13 NS conducted statistical analysis, interpretation of results and editing of the manuscript. DR and LG  
14  
15 assisted with data collection and interpretation of the results; AR is the guarantor.  
16  
17

18  
19 Competing interests: All authors declare that the answer to the questions on your competing interests form  
20  
21 are all no and therefore have nothing to declare. All authors have completed the Unified Competing  
22  
23 Interest form at [www.icmje.org/coi\\_disclosure.pdf](http://www.icmje.org/coi_disclosure.pdf) (available on request from the corresponding author)  
24  
25 and declare that (1) they have no relationships with any companies that might have an interest in the  
26  
27 submitted work in the previous 3 years; (2) their spouses, partners, or children have no financial  
28  
29 relationships that may be relevant to the submitted work; and (3) have no specified or non-financial  
30  
31 interests that may be relevant to the submitted work.  
32  
33  
34  
35

36  
37 Ethical approval. King's College Hospital Research Ethics Committee (06/Q0703/131).  
38

#### 39 **Acknowledgements**

40  
41 We thank Charlotte Ellerton, Sheetal Gohil, Catherine Fleuret, Jessica Zubek, Sharon Wheelock, Joanna  
42  
43 Lam, Abigail Wilson and Lucy Diamond for participant recruitment and the medical and nursing staff  
44  
45 who completed the enteral and parenteral feeding charts.  
46

47  
48 Copyright. The Corresponding Author has the right to grant on behalf of all authors and does grant on  
49  
50 behalf of all authors, an exclusive licence (or non exclusive for government employees) on a worldwide  
51  
52 basis to the BMJ Publishing Group Ltd and its licensees, to permit this article (if accepted) to be published  
53  
54 in BMJ editions and any other BMJPG products and to exploit all subsidiary rights, as set out in our  
55  
56 licence.  
57  
58  
59  
60

Flow chart 1. Flow chart showing number of participants at each stage of the study and stratification.

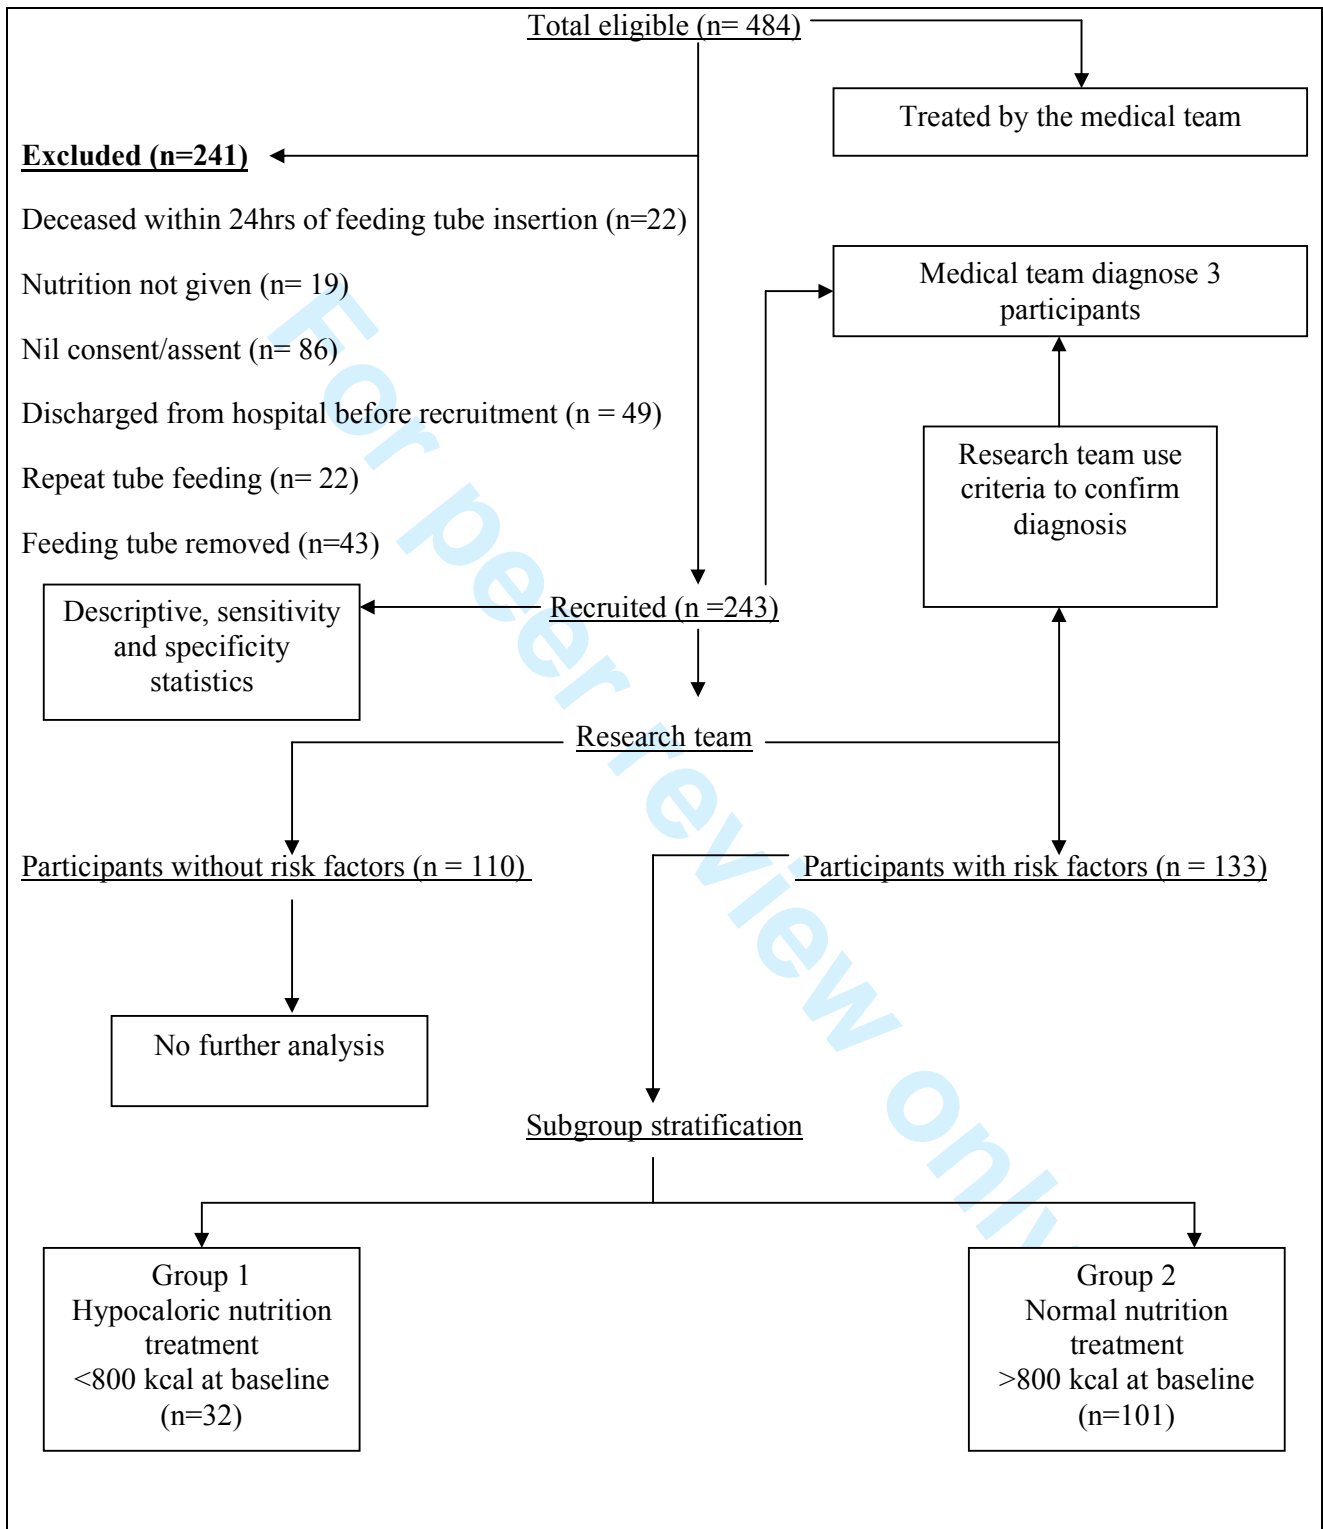

Table 1. Cohort information, diagnostic data, supplementation totals and energy intake. (n= 243)

| Factor                                         | Location          |                   |                   |
|------------------------------------------------|-------------------|-------------------|-------------------|
|                                                | Ward (n= 153)     | HDU (n= 46)       | ICU (n= 44)       |
| Male                                           | 78                | 25                | 27                |
| Female                                         | 75                | 21                | 17                |
| <b>Age</b>                                     |                   |                   |                   |
| Median                                         | 62.00             | 53.00             | 52.50             |
| 95% CI                                         | 56.23 – 62.13     | 48.11 – 58.43     | 47.05 – 56.00     |
| IQR                                            | 47.00 – 73.00     | 39.00 – 67.50     | 41.00 – 61.75     |
| <b>Diagnostic categories</b>                   |                   |                   |                   |
| Neurological                                   | 39                | 20                | 16                |
| Respiratory                                    | 6                 | 5                 | 2                 |
| Trauma                                         | 6                 | 0                 | 0                 |
| Medicine                                       | 9                 | 0                 | 0                 |
| Hepatology                                     | 25                | 2                 | 10                |
| Renal                                          | 8                 | 1                 | 0                 |
| Pancrease                                      | 9                 | 0                 | 1                 |
| Gastroenterology                               | 6                 | 3                 | 4                 |
| Cancer                                         | 13                | 2                 | 0                 |
| Cardiovascular                                 | 22                | 9                 | 4                 |
| Surgical                                       | 7                 | 1                 | 5                 |
| Sepsis                                         | 3                 | 3                 | 2                 |
| <b>Length of stay (days)</b>                   |                   |                   |                   |
| Median                                         | 28.50             | 38.00             | 29.50             |
| 95% CI                                         | 32.99 – 44.95     | 37.81 – 73.52     | 28.52 – 39.98     |
| IQR                                            | 17.00 – 47.50     | 17.00 – 67.50     | 20.50 – 42.75     |
| <b>Electrolyte supplementation totals</b>      |                   |                   |                   |
| Potassium                                      | 72                | 29                | 37                |
| Phosphate                                      | 48                | 24                | 21                |
| Magnesium                                      | 46                | 28                | 35                |
| <b>B vitamin supplementation totals</b>        | 43                | 10                | 8                 |
| <b>Duration of artificial nutrition (days)</b> |                   |                   |                   |
| Median                                         | 10.50             | 15.00             | 15.00             |
| 95% CI                                         | 8.86 – 10.50      | 11.27 – 13.62     | 11.78 – 14.00     |
| IQR                                            | 5.00 – 15.00      | 9.50 – 15.00      | 12.25 – 15.00     |
| <b>Energy intake kcal/day 95% CI</b>           |                   |                   |                   |
| Baseline                                       | 547.43 – 937.03   | 515.13- 1023.79   | 751.75 – 1560.98  |
| Day 3                                          | 844.91 – 1173.42  | 1122.88 – 1537.43 | 1088.76 – 1864.51 |
| Day 6                                          | 1099.98 – 1535.26 | 1238.85 – 1792.07 | 1136.19 – 1997.63 |
| Day 9                                          | 1063.29 – 1490.58 | 1007.95 – 1738.51 | 1099.97 – 2017.30 |

CI = confidence interval

IQR = inter quartile range at 25<sup>th</sup> and 75<sup>th</sup> centiles.



Table 2. Moderately and severely low serum electrolyte values with mortality (participants n = 243).

|                  | Number of moderately low values | Mortality | Number of severely low values | Mortality |
|------------------|---------------------------------|-----------|-------------------------------|-----------|
| <b>Potassium</b> | <3.4 mmol/L                     |           | <2.5 mmol/L                   |           |
| Day 1            | 20                              | 0         | 1                             | 0         |
| Day 3            | 22                              | 0         | 3                             | 0         |
| Day 6            | 11                              | 0         | 0                             | 0         |
| Day 9            | 7                               | 1         | 1                             | 0         |
| <b>Phosphate</b> | <0.5 mmol/L                     |           | <0.32 mmol/L                  |           |
| Day 1            | 7                               | 1         | 3                             | 0         |
| Day 3            | 15                              | 3         | 1                             | 0         |
| Day 6            | 4                               | 0         | 0                             | 0         |
| Day 9            | 2                               | 0         | 0                             | 0         |
| <b>Magnesium</b> | <0.6 mmol/L                     |           | <0.5 mmol/L                   |           |
| Day 1            | 14                              | 0         | 5                             | 0         |
| Day 3            | 5                               | 0         | 2                             | 0         |
| Day 6            | 4                               | 0         | 2                             | 0         |
| Day 9            | 5                               | 0         | 3                             | 0         |

Normal hospital reference ranges potassium 3.5 – 5.0 mmol/L, phosphate 0.8 – 1.4 mmol/L and magnesium 0.7 – 1.00 mmol/L.

Table 3. Confidence interval, sensitivity and specificity analysis for the refeeding syndrome. (n = 243).

|                                                                     | 95% CI        | Sensitivity (%) | Specificity (%) |
|---------------------------------------------------------------------|---------------|-----------------|-----------------|
| BMI < 16 (kg/m <sup>2</sup> )                                       | 22.95 - 24.40 | 0.0*            | 93.1            |
| Poor intake for > 10 days                                           | †             | 66.7            | 84.5            |
| Unintentional weight loss > 15% in the preceding three - six months | 10.04 – 13.77 | 66.7            | 59.1            |
| Serum potassium at baseline < 2.6mmol/L                             | 4.01 – 4.18   | 0.0             | 99.6            |
| Serum phosphate at baseline < 0.33mmol/L                            | 1.04 – 1.16   | 33.3            | 99.1            |
| Serum magnesium at baseline < 0.6mmol/L                             | 0.81 – 0.88   | 66.7            | 93.3            |

†Categorical data not applicable.

\*BMI uses height and weight to calculate score therefore sensitivity analysis was not applicable.

CI= confidence interval.

Table 4. Malnutrition profiles of the two groups. Figures are totals within each group.

| <b>Risk factors</b>                              | <b>Group 1</b> | <b>Group 2</b> | <b>Totals</b> |
|--------------------------------------------------|----------------|----------------|---------------|
| BMI < (16kg/m <sup>2</sup> )                     | 6              | 4              | 10            |
| BMI < (14kg/m <sup>2</sup> )                     | 1              | 1              | 2             |
| Wt loss > 15%<br>within the previous 3-6 months  | 16             | 9              | 25            |
| Poor nutritional<br>intake > 10 days             | 20             | 15             | 35            |
| Low baseline serum electrolyte<br>concentrations |                |                |               |
| Potassium <3.5 mmol/L                            | 14             | 6              | 20            |
| Phosphate <0.8 mmol/L                            | 20             | 14             | 34            |
| Magnesium <0.7 mmol/L                            | 11             | 10             | 21            |

Table 5. Energy intake of the two groups (participants n=133). .

|                 | <b>Group 1</b>   | <b>Group 2</b>    |
|-----------------|------------------|-------------------|
| <b>Baseline</b> |                  |                   |
| Median intake   | 380.00           | 862.50            |
| 95% CI          | 250.76 – 594.99  | 837.57 – 1174.22  |
| IQR             | 206.00 – 552.50  | 821.25 – 1300.0   |
| Mean kcal/kg    | 7.12             | 15.60             |
| <b>Day 3</b>    |                  |                   |
| Median intake   | 845.00           | 1315.00           |
| 95% CI          | 598.98 – 899.77  | 1220.21 – 1507.16 |
| IQR             | 468.75 – 1000.00 | 1030 – 1584.25    |
| Mean kcal/kg    | 12.59            | 21.35             |
| <b>Day 6</b>    |                  |                   |
| Median intake   | 1312.50          | 1500.00           |
| 95% CI          | 935.83 – 1538.54 | 1306.40 – 1675.54 |
| IQR             | 675.00 – 1575.00 | 1257.50 – 1837.00 |
| Mean kcal/kg    | 20.79            | 23.35             |
| <b>Day 9</b>    |                  |                   |
| Median intake   | 1462.50          | 1482.50           |
| 95% CI          | 983.15 – 1644.98 | 1178.32 – 1573.26 |
| IQR             | 843.75 – 1750.00 | 939.50 – 1700.00  |
| Mean kcal/kg    | 23.13            | 21.54             |

CI= Confidence Interval for mean.

IQR = Inter Quartile Range 25<sup>th</sup> and 75<sup>th</sup> centiles.

Table 6. Characteristics of the three participants confirmed with refeeding syndrome.

|                                             | Participant<br>x | Participant<br>y | Participant<br>z |
|---------------------------------------------|------------------|------------------|------------------|
| Age years                                   | 48               | 23               | 31               |
| Diagnostic group                            | trauma           | gastroenterology | hepatology       |
| Chronic condition                           | alcoholism       | malnutrition     | alcoholism       |
| Route of artificial nutrition and hydration | enteral          | enteral          | enteral          |
| Baseline received energy kcal day           | 800              | 294              | 325              |
| Baseline energy kcal kg                     | 12.7             | 6.3              | 8.1              |
| Body weight kg                              | 63               | 47               | 40               |
| BMI (kg/m <sup>2</sup> )                    | 20               | 16               | 16               |
| Intravenous carbohydrate                    | yes              | yes              | yes              |
| Survival outcome                            | survived         | survived         | survived         |

Box 1. Criteria for the determination of refeeding syndrome risk.<sup>3</sup>

| One of the following:                                                                                                                                                                                                                                                                                                    | Two of the following:                                                                                                                                                                                                                                                                  |
|--------------------------------------------------------------------------------------------------------------------------------------------------------------------------------------------------------------------------------------------------------------------------------------------------------------------------|----------------------------------------------------------------------------------------------------------------------------------------------------------------------------------------------------------------------------------------------------------------------------------------|
| <ul style="list-style-type: none"> <li>• BMI &lt; 16 (kg/m<sup>2</sup>)</li> <li>• Unintentional weight loss &gt;15% in the preceding three – six months</li> <li>• Very little or no nutritional intake for more than 10 days</li> <li>• Low levels of serum potassium, phosphate or magnesium prior to feed</li> </ul> | <ul style="list-style-type: none"> <li>• BMI &lt; 18.5 (kg/m<sup>2</sup>)</li> <li>• Unintentional weight loss &gt;10% in the preceding three – six months</li> <li>• Very little or no nutritional intake for more than 5 days</li> <li>• History of alcohol or drug abuse</li> </ul> |

Box 2. Criteria for confirmation of refeeding syndrome from the commencement of artificial nutrition and hydration.

|                                                                                                                                                                                                                                                                                                            |                                                                                                                                   |
|------------------------------------------------------------------------------------------------------------------------------------------------------------------------------------------------------------------------------------------------------------------------------------------------------------|-----------------------------------------------------------------------------------------------------------------------------------|
| <p>1. Electrolytes.</p> <ul style="list-style-type: none"> <li>• Potassium</li> <li>• Phosphate</li> <li>• Magnesium</li> </ul> <p>2. Peripheral oedema or acute circulatory fluid overload.</p> <p>3. Disturbance to organ function including respiratory failure, cardiac failure, pulmonary oedema.</p> | <p>Severely low electrolyte concentrations<sup>4</sup></p> <p>&lt; 2.5 mmol/L*</p> <p>&lt; 0.32 mmol/L</p> <p>&lt; 0.5 mmol/L</p> |
|------------------------------------------------------------------------------------------------------------------------------------------------------------------------------------------------------------------------------------------------------------------------------------------------------------|-----------------------------------------------------------------------------------------------------------------------------------|

\*King's College Hospital severely low serum potassium concentration value requiring replacement.

**Data sharing statement** No additional data is available.

## References

1. Solomon SM, Kirby DF. The refeeding syndrome: A review. *JPEN* 1990;14(1): 90-7.
2. Schnitker MA, Mattman PE, Bliss TL. A clinical study of malnutrition in Japanese prisoners of war. *Ann Intern Med* 1951;35:69-96.
3. National Institute for Health and Clinical Excellence. Nutrition support in adults. CG32, London, England.
4. Crook MA, Hally V, Panteli JV. The importance of the refeeding syndrome. *Nutrition* 2001; 17:632-7.
5. Weinsier RL, Krumdieck CL. Death resulting from overzealous total parenteral nutrition: The refeeding syndrome revisited. *Am J Clin Nutr* 1981; 34: 393-9.
6. Zeki S, Culkin A, Gabe SM, Nightingale JM. Refeeding hypophosphataemia is more common in enteral than parenteral feeding in adult patients. *Clin Nutr* 2011;365-68.
7. Kaganski M, Levy S, Koren-Morag N, Berger D, Knobler H. Hypophosphataemia in the elderly is associated with the refeeding syndrome and reduced survival. *J Intern Med* 2005;257-61.
8. Flesher ME, Archer KA, Leslie BD, McCollom RA, Martinka GP. Assessing the metabolic and clinical consequences of early enteral feeding in the malnourished patient. *JPEN* 2005;29:108-17.
9. Schofield WN, Schofield C, James WPT. Basal Metabolic Rate. Human Nutrition: *Clinical Nutrition* 1985; 39: 1-96.
10. Elia M. Changing concepts of nutrient requirements in disease: implications for artificial nutritional support. *Lancet* 1995; 345: 1279-84.
11. King AL, Sica DA, Miller G, Pierpaoli S. Severe hypophosphataemia in a general hospital population. *South Med J* 1987;80:831-5.

- 1  
2  
3  
4  
5  
6  
7  
8  
9  
10  
11  
12  
13  
14  
15  
16  
17  
18  
19  
20  
21  
22  
23  
24  
25  
26  
27  
28  
29  
30  
31  
32  
33  
34  
35  
36  
37  
38  
39  
40  
41  
42  
43  
44  
45  
46  
47  
48  
49  
50  
51  
52  
53  
54  
55  
56  
57  
58  
59  
60
12. Hoffman M, Zemlin AE, Meyer WP, Erasmus RT. Hypophosphataemia at a large academic hospital in south Africa. *J Clin Pathol* 2008;61:1104-7.
13. Betro MG, Pain RW. Hypophosphataemia and hyperphosphataemia in a hospital population. *BMJ* 1972;1:273-6.
14. Guillou PJ, Morgan DB, Hill GL. Hypophosphataemia: a complication of innocuous dextrose saline. *The Lancet* 1976;308:710-12.
15. Patel U, Sriram K. Acute respiratory failure due to refeeding syndrome and hypophosphataemia induced by hypocaloric enteral nutrition. *Nutrition* 2009;25:364-7.
16. Brown EL, Gwynne Jenkins BA. A case of respiratory failure complicated by acute hypophosphataemia. *Anaesthesia* 1980;35:42-5.
17. Heymsfield SB, Bethel RA, Ansley JD, Gibbs DM, Felner JM, Nutter DO. Cardiac abnormalities in cachectic patients before and during nutritional repletion. *Am Heart J* 1978;95:584-94.
18. Faintuch J, Soriano, FG, Ladeira JP, Janiszewski M, Velasco IT, Gama-Rodrigues JJ. Refeeding procedures after 43 days of total fasting. *Nutrition* 2001;17:100-4.
19. Korbonitis M, Blaine D, Elia M, Powell-Tuck J. Metabolic and hormonal changes during the refeeding period of prolonged fasting. *Eur J Endocrinol* 2007;157:157-66.
20. Whitelaw M, Gilbertson H, Lam PY, Sawyer SM. Does aggressive refeeding in hospitalized adolescents with anorexia nervosa result in increased hypophosphataemia? *J Adolescent Health* 2010;46:577-82.
21. Cumming AD, Farquhar JR, Bouchier A. Refeeding hypophosphataemia in anorexia nevosa and alcoholism. *BMJ* 1987;295:490-1.

1  
2 22. Terlevich A, Hearing SD, Woltersdorf WW, Smyth C, Reid D, McCullagh E, et al. Refeeding  
3 syndrome: effective and safe treatment with Phosphates Polyfusor. *Aliment Pharm Therap* 2003;7:1325-9.  
4  
5

6  
7  
8  
9 23. Mehanna HM, Moledina J, Travis J. Refeeding syndrome: what it is and how to prevent and treat it.  
10  
11 *BMJ* 2008; 336; 1495-8.  
12  
13

14  
15  
16  
17  
18  
19  
20  
21  
22  
23  
24  
25  
26  
27  
28  
29  
30  
31  
32  
33  
34  
35  
36  
37  
38  
39  
40  
41  
42  
43  
44  
45  
46  
47  
48  
49  
50  
51  
52  
53  
54  
55  
56  
57  
58  
59  
60

For peer review only

1  
2  
3 **Response to reviewers.**  
4

5 **Reviewer 1. Professor M Hiesmayr.**  
6

7 **1. Reviewer Comment**  
8

9 Description of participants: there is no table describing the population according to some major clinical  
10 categories (before or after surgery, internal medicine, geriatrics, ..... ) diagnostic categories (ICD10 or  
11 similar) and length of stay before inclusion. Age, gender and location in the hospital is given.  
12

13 **1. Author Response**  
14

15 The authors have included this information in Table 1.  
16

17 **2. Reviewer Comment**  
18

19 There is only minimal use of statistics. Level of association between degree of refeeding syndrome and  
20 predictors was tested once with fisher's exact test, but multiple testing was probably done.  
21

22 **2. Author Response**  
23

24 We accept the weakness of only three positive cases for statistical analysis. This small number of positive  
25 cases prevented us from performing regression analysis. We include this in the strength and weaknesses  
26 section.  
27

28 **3. Reviewer Comment**  
29

30 The consort checklist is the original from the website but does not contain any information related to the  
31 actual manuscript.  
32

33 **3. Author Response**  
34

35 The STROBE checklist is fully completed and included in the resubmission. We have included the  
36 STROBE checklist as it is applicable to the cohort study design.  
37

38 **4. Reviewer Comment**  
39

40 Presenting sensitivity and specificity based on 3 cases is misleading giving the number of cases in each  
41 category would be more informative, measures of precision are missing.  
42

43 **4. Author Response**  
44

45 The authors have addressed this in the strengths and weaknesses section and given more detail in the  
46 discussion. We have added the confidence intervals to provide the reader with more detail. Precision was  
47 set at 70%.  
48

49 **5. Reviewer Comment**  
50

51 The consort statement is included as a raw file without reference to the current work. Exposure and  
52 outcome are well defined (box 1 and 2) but how and whether all cases could be identified. The problem is  
53 also partially addressed in the paper. Confounding (e.g. by preventive clinical interventions) is not  
54 addressed and numbers are not systematically given.  
55  
56  
57  
58  
59  
60



## 5. Author Response

The CONSORT statement is included with complete reference to the current work. The confounding factor of preventative interventions by the medical team has been added to the manuscript. The total participants who received electrolytes has also been added.

## 6. Reviewer Comment

This paper has an interesting research approach to an important question: Do published reports from NICE on the prevention of refeeding syndrome correctly identify the population at risk? (a reference to the Clinical Review Refeeding syndrome: what it is, and how to prevent and treat it BMJ 2008; 336 doi: 10.1136/bmj.a301 (Published 26 June 2008) Cite this as: BMJ 2008;336:149) should also be considered).

## 6. Author Response

This paper has been cited and is now included in the discussion.

## 7. Reviewer Comment

Based on this reference the definition of refeeding syndrome is not generally accepted and a major reference is to hypophosphatemia with incidences between 0.4% in hospitalised and, between 18-100% in ICU depending on phosphate policies. Thus any systematic contribution to this field is important. The authors have used a definition for refeeding syndrome with a clinical perspective to confirm the diagnosis but this has added difficulties to the project that need to be clearly addressed to guide potential reader.

## 7. Author Response

We have clarified the recruitment process, how the diagnosis was confirmed, added a heading to the flow chart which we anticipate clarifies the reading of the manuscript for potential readers.

## 8. Reviewer Comment

The derivation of criteria used to identify cases needs to be explained with the sources used.

## 8. Author Response

We have added the derivation of criteria used in Box 2 sourced from NICE 2006 which is reference number three in the references section.

## 9. Reviewer Comment

The application of these criteria in practice needs clarification. If I understand well only those having a diagnosis of refeeding syndrome were assessed for the presence of the "confirmed refeeding syndrome". Probably there should be a step also the flow chart of "suspected refeeding syndrome".

## 9. Author Response

A new step in the flow chart has been added, group totals have been simplified and the subgroup analysis we hope is clearer. The authors have made reference to this in the STROBE document.

**10. Reviewer Comment**

Degree of refeeding syndrome is indicated in statistical methods and results but not explained ( 1/2/3 facets?)

**10. Author Response**

The authors have amended the manuscript for clarity.

**11. Reviewer Comment**

Patient identification was done only in those patients referred for artificial nutrition. Thus the incidence estimate may depend on the artificial nutrition use practice of the institution.

**11. Author Response**

The results are applicable to an adult population who received artificial nutrition and hydration with careful monitoring of serum electrolyte values. We do not have data on the use of artificial nutrition in the organization. However, we accept the reviewer's comments as being valid and have added more detail to the discussion section. We accept and include that the occurrence of refeeding syndrome in a general adult hospital population treated with oral feeding may produce different results.

**12. Reviewer Comment**

Many patients died in the relatively large group not included (especially early after feeding tube insertion). This issue is correctly addressed by the authors.

**12. Author Response**

The reason for early mortality post feeding tube insertion is discussed in the manuscript.

**13. Reviewer Comment**

Many patients especially in the surgical patients develop severe hypophosphatemia within the first 24 hours after surgery and a second peak is around day 3. If as in this case patients are included after 48 hours and assessed 24 hours later the syndrome may already have occurred.

**13. Author Response**

Recruitment into the study was within 48 hours of commencement of enteral or parenteral tube feeding. Baseline serum electrolytes were measured within 24 hours of recruitment. Electronic serum electrolyte results were available for retrospective review. These three factors enabled the research team to capture all cases of the refeeding syndrome and not miss any due to the syndrome having already occurred. Use of the three facet criteria which required electrolyte, fluid shifts and organ dysfunction provided the researcher team an element of certainty to rule out falsely diagnosing single electrolyte shifts due to other reasons.

**14. Reviewer Comment**

Confounding by nutritional interventions or location of patients (ward, hdu, icu) probably should be considered.

**14. Author Response**

The preventative confounding actions of the medical teams has been included in the discussion.

**15. Reviewer Comment**

A more detailed description of the patients is needed. Type of patient, location, diagnostic category, before or after surgery, internal medicine.

**15. Author Response**

The authors have added Table 1 which contains more detail of patient type, location and diagnostic category. Duration of stay prior to recruitment was not available to the researchers.

**16. Reviewer Comment**

Nice to address that moderately diminished electrolytes were associated with more risk of death than severe disturbance. Could admission to an ICU be the positive confounder whereas remaining on the ward with moderate values may be a risk factor because appropriate treatment and recognition of symptoms may be delayed.

**16. Author Response**

The authors have included this and the positive confounder of admission to the ICU. The reviewer highlights an important development and the medical progress of severely malnourished individuals has been included. We are grateful to the reviewers insight for this aspect of survival.

**17. Reviewer Comment**

I discourage using sensitivity when only 3 cases are identified.

**17. Author Response**

The authors have maintained the sensitivity analysis in Table 3 to identify to readers the low sensitivity of the risk factors when determining risk and treatment of fasted and starved individuals. The authors maintain this part of the research which they hope will stimulate further research into reliable predictors. However, the authors address the reviewers concerns on the limitations of the sensitivity analyses in the strengths and weaknesses section of the paper.

**18. Reviewer Comment**

Table 4: The risk profile in the reduced intake (to prevent refeeding syndrome) is nearly identical to the normal intake group. Does this indicate that the clinical pathway is confounded by some other factor affecting the nutrition decision process.

**18. Author Response**

The malnutrition profiles in Table 4 are almost identical not because the clinical pathway and nutrition decisions are different but because the risk factors are weak predictors irrespective of energy intake. The weakness of the risk factors is they capture too many variables. The analysis and interpretation has been developed and discussed in much more detail now.

**19. Reviewer Comment**

Table 5: may be unnecessary for the actual question but shows that nutrition is not advanced after a few days on very low intake. This should be compared to the recommendations.

**19. Author Response**

Table 5 is maintained to highlight to the target audience, dietitians and nutrition teams, that prescription of hypocaloric feeding may be unnecessary in many individuals and may inadvertently contribute to malnutrition. The authors thank the reviewer for this insight which has been expanded in the discussion.

**20. Reviewer Comment**

The most important finding is that 2/3 cases had received the "preventive nutrition regimen". All 3 survived possibly because admitted to an ICU.

**20. Author Response**

The authors agree that the most important finding was that despite treatment with a preventative nutrition regimen it did not prevent life threatening symptoms of refeeding syndrome. The participants survived because they were admitted to an ICU highlighting the developments of medicine since the first reported cases of refeeding syndrome. This has been added to the manuscript.

**21. Reviewer Comment**

The low incidence in the risk group needs to be discussed in view of all selection and measurement bias and possible confounding by treatments during the 3 days before evaluation.

**21. Author Response**

We have added the following for clarity, "The small number of refeeding syndrome cases may have been due to the medical teams taking preventative actions to avoid the syndrome. The electrolyte threshold values could be interpreted as too low to capture all cases. The severely low electrolyte threshold values were obtained from a review of the evidence to enable unequivocal confirmation of positive cases. This discreet approach was taken to avoid inclusion of borderline cases or falsely including participants with single, abnormal electrolyte concentrations."

The authors clarify that there was no 3 day period before evaluation. Participants were recruited within 48hrs of commencing artificial nutrition and therefore all cases were captured.

**22. Reviewer Comment**

The generalisability is probably limited because this is not general population of hospitalised patients but "those referred for nutrition treatment". a clarification is possible.

**22. Author Response**

The authors accept the generalisability is limited to adults commenced on artificial nutrition and hydration. However, many dietitians and nutrition teams prescribe feeds and this detail of the manuscript provides evidence for practice change. The authors have addressed the reviewers comments in the manuscript.

**23. Reviewer Comment**

The important finding that preventive measures may not work needs emphasis.

**23. Author Response**

The authors have addressed this in the paper and included it into the abstract and key message of the paper.

**Reviewer 2. Dr Stephen Taylor.****1. Reviewer Comment**

Capital letter after colon.

**1. Author Response**

The authors have made this grammar change.

**2. Reviewer Comment**

Key messages: Bullet point

**2. Author Response**

The authors have made this change.

**3. Reviewer Comment**

Replace 'authenticated' with 'diagnosed'.

**3. Author Response**

The authors have made this change.

**4. Reviewer Comment**

'risk factors'? Readers won't know what these are at this point, tell them.

**4. Author Response**

The authors have made this change.

**5. Reviewer Comment**

I'd rather try: Mortality was not attributed to refeeding syndrome either during feeding (5.3%, 13/243) or hospital admission (28.0%, 68/243).

**5. Author Response**

The authors have changed this sentence.

**6. Reviewer Comment**

Overall: Needs to be more emphasis that refeeding could not be accurately predicted, occurred in spite of hypocaloric feeding and treatable and that this evidence questions the merit of current guidelines that advise slow introduction of feeding and thereby increase risk of malnutrition.

**6. Author Response**

The authors have addressed these points.

**7. Reviewer Comment**

Instead of: refeeding orally, enterally or parenterally..... Try: oral, enteral or parenteral refeeding.

**7. Author Response**

The authors have made this change.

**8. Reviewer Comment**

Systematic literature review': Do you give details?

**8. Author Response**

The authors have changed this to evidence review.

**9. Reviewer Comment**

How were energy prescriptions calculated, eg. BMR + stress factors and their reference.

**9. Author Response**

The details of the energy prescriptions and references have been included.

**10. Reviewer Comment**

Nutritionist' or really a dietitian; many of the former are not adequately qualified.

**10. Author Response**

This has been changed to research assistant.

**11. Reviewer Comment**

Positive refeeding syndrome' Readers would find 'refeeding syndrome risk' clearer.

**11. Author Response**

The authors have changed this

**12. Reviewer Comments**

After “)” insert “,” participants, of participants

**12. Author Response**

The authors have made these grammar and punctuation changes.

**13. Reviewer Comments**

Is there a reason for such high mortality on wards relative to HDU/ICU areas where you would expected it to be higher.

**13. Author Response**

The authors interpret the higher mortality on the wards, compared to ICU/HDU, as organizational factors which were predominantly neurological and stroke orientated population and a tendency to feed close to death. There is the possibility that participants initially recruited on the ICU were transferred to the wards and subsequently died in that location.

**14. Reviewer Comments**

Try instead: Only low baseline magnesium significantly ( $p = 0.021$ ) predicted refeeding syndrome; other independent variables were not significantly associated.

**14. Author Response**

The authors have made this change.

**15. Reviewer Comments**

Just to be clear, were these single IV and oral doses: state.

State Pabrinex 1+2 as it comes in two separate parts.

Infused over how long?

Unless it's a different polyfusor, our provides 50mmol per 500mL.

**15. Author Response**

The authors have clarified the formulation, dose, infusion duration and concentration.

**16. Reviewer Comments**

IV dextrose...' This sentence isn't clear. Are you saying IV glucose may help precipitate PO4 levels <0.7mM and has been associated with resp failure when PO4 levels fell to between 0.2-0.36mM?

- Please clarify.

**16. Author Response**

The authors have clarified this important aspect of the manuscript analysis and interpretation. The authors have included a revised and extended section on glucose metabolism and its role as precursor to refeeding symptoms in the three cases.

**17. Reviewer Comments**

100mmol/L, oral/enteral phosphate sandoz is 16mmol/tablet.

**17. Author Response**

The authors have made this change.

**18. Reviewer Comments**

Bullet point to make each point stand out separately.

**18. Author Response**

The authors have made this change.

STROBE checklist.

|                           | Item No | Recommendation                                                                                                                                                                                                                                                                                                                                                                                                                                                                                                                                                                                                                                                                                                                                                                                                                                                                                                                                                                                                                                                                                                                                                                                                                                                                                                                                                                                                                                                                                                                                                                                                                                                                                                                                                                                                                                                                                                                                                                                                                                                                                                                                                                                                                                                                                                                                                                                                                                            |
|---------------------------|---------|-----------------------------------------------------------------------------------------------------------------------------------------------------------------------------------------------------------------------------------------------------------------------------------------------------------------------------------------------------------------------------------------------------------------------------------------------------------------------------------------------------------------------------------------------------------------------------------------------------------------------------------------------------------------------------------------------------------------------------------------------------------------------------------------------------------------------------------------------------------------------------------------------------------------------------------------------------------------------------------------------------------------------------------------------------------------------------------------------------------------------------------------------------------------------------------------------------------------------------------------------------------------------------------------------------------------------------------------------------------------------------------------------------------------------------------------------------------------------------------------------------------------------------------------------------------------------------------------------------------------------------------------------------------------------------------------------------------------------------------------------------------------------------------------------------------------------------------------------------------------------------------------------------------------------------------------------------------------------------------------------------------------------------------------------------------------------------------------------------------------------------------------------------------------------------------------------------------------------------------------------------------------------------------------------------------------------------------------------------------------------------------------------------------------------------------------------------------|
| <b>Title and abstract</b> | 1       | <p>Occurrence of the refeeding syndrome in adults commenced on artificial nutrition and hydration: prospective cohort study.</p> <hr/> <p><b>Background</b> Refeeding syndrome is the metabolic response to excess nutrition in starved individuals characterised by severe intracellular electrolyte shifts, acute circulatory fluid overload and organ failure. It can occur during enteral, parenteral or oral feeding.</p> <p><b>Objective</b> To determine the occurrence of refeeding syndrome in adults commenced on artificial nutrition and hydration.</p> <p><b>Design</b> Prospective cohort study.</p> <p><b>Setting</b> Large, single site university teaching hospital. Recruitment period 2007-2009.</p> <p><b>Participants</b> 243 adults commenced on artificial nutrition and hydration for the first time during that admission recruited from wards and intensive care.</p> <p><b>Main outcome measures</b> Primary outcome: Occurrence of the refeeding syndrome. Secondary outcome: Sensitivity and specificity of the risk factors for predicting refeeding syndrome. Tertiary outcome: Mortality due to refeeding syndrome and all cause mortality.</p> <p><b>Results</b> 133 participants had risk factors and 3 participants (2%) were diagnosed with the refeeding syndrome. Poor nutritional intake for more than 10 days, weight loss &gt;15% prior to recruitment and a low serum magnesium level at baseline had sensitivity values of 66.7%. Specificity of risk factors for refeeding syndrome were &gt;80% apart from weight loss of &gt;15% which had a specificity of 59.1%. Only low baseline serum magnesium (p=0.021) predicted refeeding syndrome; other independent variables were not significantly associated. There were no deaths attributable to the refeeding syndrome but (5.3%13/243) participants died during the feeding period and (28.0% 68/243) died during the hospital admission.</p> <p><b>Conclusion</b><br/>Refeeding syndrome was a rare, survivable phenomenon that occurred during hypocaloric feeding in participants identified at risk. Predictors for refeeding syndrome were starvation and low serum magnesium concentration. Intravenous carbohydrate infusion prior to artificial nutrition and hydration may have precipitated the onset of refeeding syndrome. The risk factors for predicting the syndrome were weak and may inadvertently have contributed to malnutrition.</p> |
| <hr/>                     |         |                                                                                                                                                                                                                                                                                                                                                                                                                                                                                                                                                                                                                                                                                                                                                                                                                                                                                                                                                                                                                                                                                                                                                                                                                                                                                                                                                                                                                                                                                                                                                                                                                                                                                                                                                                                                                                                                                                                                                                                                                                                                                                                                                                                                                                                                                                                                                                                                                                                           |
| <b>Introduction</b>       |         |                                                                                                                                                                                                                                                                                                                                                                                                                                                                                                                                                                                                                                                                                                                                                                                                                                                                                                                                                                                                                                                                                                                                                                                                                                                                                                                                                                                                                                                                                                                                                                                                                                                                                                                                                                                                                                                                                                                                                                                                                                                                                                                                                                                                                                                                                                                                                                                                                                                           |
| Background/rationale      | 2       | <p>Refeeding syndrome is the metabolic response to excess carbohydrate or nutrition in starved individuals characterised by severe intracellular electrolyte shifts, acute circulatory fluid overload and organ failure. It can occur during enteral, parenteral or oral feeding. However, a precise diagnostic criteria is lacking. The accuracy of risk factors for predicting refeeding syndrome are unknown.</p>                                                                                                                                                                                                                                                                                                                                                                                                                                                                                                                                                                                                                                                                                                                                                                                                                                                                                                                                                                                                                                                                                                                                                                                                                                                                                                                                                                                                                                                                                                                                                                                                                                                                                                                                                                                                                                                                                                                                                                                                                                      |
| Objectives                | 3       | <p>Primary outcome: Occurrence of the refeeding syndrome.<br/>Secondary outcome: Sensitivity and specificity of the risk factors for</p>                                                                                                                                                                                                                                                                                                                                                                                                                                                                                                                                                                                                                                                                                                                                                                                                                                                                                                                                                                                                                                                                                                                                                                                                                                                                                                                                                                                                                                                                                                                                                                                                                                                                                                                                                                                                                                                                                                                                                                                                                                                                                                                                                                                                                                                                                                                  |



predicting refeeding syndrome.

Tertiary outcome: Mortality due to refeeding syndrome.

| <b>Methods</b>               |    |                                                                                                                                                                                                                                                                                                                                                                                                                                                                                                                                                                                                                                                                                                                                                                                                                                                                                                                                                  |
|------------------------------|----|--------------------------------------------------------------------------------------------------------------------------------------------------------------------------------------------------------------------------------------------------------------------------------------------------------------------------------------------------------------------------------------------------------------------------------------------------------------------------------------------------------------------------------------------------------------------------------------------------------------------------------------------------------------------------------------------------------------------------------------------------------------------------------------------------------------------------------------------------------------------------------------------------------------------------------------------------|
| Study design                 | 4  | Prospective cohort study which recruited adults referred for artificial nutrition and hydration. Recruitment was within 48 hours of commencing artificial nutrition and hydration. Serum electrolyte concentration levels were recorded at baseline then every third day for the duration of study participation at day 15. A three facet diagnostic criteria was used to confirm positive cases of refeeding syndrome. Symptoms of the refeeding syndrome were severely low electrolyte concentrations, acute circulatory fluid overload and organ dysfunction. These symptoms had to have occurred after the commencement of artificial nutrition and hydration for the diagnosis of refeeding syndrome to be made.                                                                                                                                                                                                                            |
| Setting                      | 5  | Ethical approval was 2006. Recruitment period 2007-2009, location was a large, single site university teaching hospital. Participants were recruited from all wards, intensive care and high dependency unit. Wards predominantly were surgical, medical, elderly, stroke and neurological. Data analysis was 2009-2011.                                                                                                                                                                                                                                                                                                                                                                                                                                                                                                                                                                                                                         |
| Participants                 | 6  | Eligibility criteria; adults >18 years of age commenced on artificial nutrition and hydration for the first time during that hospital admission. All participants were recruited within 48 hours of the commencement of artificial nutrition and hydration. Study participation was for the duration of artificial nutrition and hydration to a maximum of 15 consecutive days. Informed consent was obtained from participants or next of kin prior to recruitment. Participants were followed up from baseline, then every third day up to day 15 of study participation.                                                                                                                                                                                                                                                                                                                                                                      |
| Variables                    | 7  | Diagnostic criteria to confirm refeeding syndrome taken from reference number three in the references section. .<br>1. Serum electrolyte concentrations falls as follows from the start of artificial nutrition and hydration; potassium < 2.5 mmol/L, phosphate < 0.32 mmol/L and magnesium < 0.5 mmol/L.<br>2. Peripheral oedema or acute circulatory fluid overload.<br>3. Disturbance to organ function including respiratory failure, cardiac failure, pulmonary oedema.<br>Risk Factors. BMI < 16 (kg/m <sup>2</sup> ), Unintentional weight loss >15% in the preceding three – six months, very little or no nutritional intake for more than 10 days, low levels of serum potassium, phosphate or magnesium prior to feed. Also these, BMI < 18.5 (kg/m <sup>2</sup> ), unintentional weight loss >10% in the preceding three – six months, very little or no nutritional intake for more than 5 days, history of alcohol or drug abuse. |
| Data sources/<br>measurement | 8  | For each variable of interest, give sources of data and details of methods of assessment (measurement). Describe comparability of assessment methods if there is more than one group<br>The diagnostic criteria was obtained from the reference; National Institute for Health and Clinical Excellence. Nutrition support in adults. CG32, London, England.                                                                                                                                                                                                                                                                                                                                                                                                                                                                                                                                                                                      |
| Bias                         | 9  | The authors were not involved in the nutritional treatment, electrolyte supplementation or the diagnosis of refeeding syndrome.                                                                                                                                                                                                                                                                                                                                                                                                                                                                                                                                                                                                                                                                                                                                                                                                                  |
| Study size                   | 10 | The study size was calculated using the estimated reported occurrence of refeeding syndrome to be between 1 - 10% within an adult hospital                                                                                                                                                                                                                                                                                                                                                                                                                                                                                                                                                                                                                                                                                                                                                                                                       |

|                        |     |                                                                                                                                                                                                                                                                                                                                                                                                                                                                                                                                                                                                                                                                                                                                                                                                                                                                                                                                                                                                                                                                                                                                                                                                                                                      |
|------------------------|-----|------------------------------------------------------------------------------------------------------------------------------------------------------------------------------------------------------------------------------------------------------------------------------------------------------------------------------------------------------------------------------------------------------------------------------------------------------------------------------------------------------------------------------------------------------------------------------------------------------------------------------------------------------------------------------------------------------------------------------------------------------------------------------------------------------------------------------------------------------------------------------------------------------------------------------------------------------------------------------------------------------------------------------------------------------------------------------------------------------------------------------------------------------------------------------------------------------------------------------------------------------|
|                        |     | population. A cohort of 240 participants was anticipated to produce between 2 - 24 positive cases of refeeding syndrome for analysis.                                                                                                                                                                                                                                                                                                                                                                                                                                                                                                                                                                                                                                                                                                                                                                                                                                                                                                                                                                                                                                                                                                                |
| Quantitative variables | 11  | All participants were classified as having risk of refeeding syndrome or not at risk. Predictor variables were transformed to binary categories representing whether or not refeeding syndrome occurred. Sensitivity and specificity values for refeeding syndrome were calculated for each predictor based on the cohort of 243 participants.                                                                                                                                                                                                                                                                                                                                                                                                                                                                                                                                                                                                                                                                                                                                                                                                                                                                                                       |
| Statistical methods    | 12  | We used Fisher's exact test to compare groups at the $p < 0.05$ level. Sensitivity and specificity analysis was conducted. The sensitivity level was 70%. We could not use multiple regression analysis due to the low number of positive cases of refeeding syndrome.<br>A subgroup of energy intakes were examined separately which were Group 1. $< 800$ kcal day versus Group 2. $> 800$ kcal day. This analysis allowed energy intake and risk factors to be analysed separately.<br>Missing data was not included in the analysis. Loss to follow up was not used.                                                                                                                                                                                                                                                                                                                                                                                                                                                                                                                                                                                                                                                                             |
| <b>Results</b>         |     |                                                                                                                                                                                                                                                                                                                                                                                                                                                                                                                                                                                                                                                                                                                                                                                                                                                                                                                                                                                                                                                                                                                                                                                                                                                      |
| Participants           | 13* | Total eligible participants 484, total recruited 243, total not recruited 241, total positive refeeding cases 3, total borderline cases with electrolyte depletion 2, total recruited with risk factors for refeeding syndrome 133.<br>Reasons for non participation were; declined participation, unable to obtain consent/assent, tube feed stopped before recruitment, mortality, transfer from hospital and feeding tube removed.<br>A flow diagram is included to provide clarity of the research process, diagnosis process and totals used in the analysis.                                                                                                                                                                                                                                                                                                                                                                                                                                                                                                                                                                                                                                                                                   |
| Descriptive data       | 14* | (a) Give characteristics of study participants (eg demographic, clinical, social) and information on exposures and potential confounders<br>243 participants were recruited median age 57.0 years (interquartile range 44.0 – 69.0), sex 130 men. 133 participants had risk factors for refeeding syndrome of which 68 were men. 212 participants received enteral nutrition, 23 participants parenteral and 8 received enteral/parenteral tube feeding. Mortality during feeding was 13/243 and during admission 68/243 the cause of death was due to underlying disease. Mortality by location was ward 45/153, high dependency unit 14/46 and intensive care 9/44.<br><br>The major confounder was the organizational policy of early electrolyte supplementation which is addressed in the strengths and weaknesses section.<br>(b) Indicate number of participants with missing data for each variable of interest<br>There was no missing data for diagnosis of refeeding syndrome.<br>All participants were assigned a risk factor for refeeding syndrome.<br>All participants were assigned a diagnostic criteria.<br>The data was complete for all 243 participants who received electrolyte supplementation and B vitamin supplementation. |
| Outcome data           | 15* | <i>Cohort study</i> —Report numbers of outcome events or summary measures over time<br>243 participants recruited, 133 participants had risk factors for refeeding syndrome, 3 cases of refeeding syndrome were confirmed, 2 cases of borderline electrolyte depletion were recorded, 13 participants died during their participation in the study, 68 died during the hospital admission.                                                                                                                                                                                                                                                                                                                                                                                                                                                                                                                                                                                                                                                                                                                                                                                                                                                           |
| Main results           | 16  | Give unadjusted estimates and, if applicable, confounder-adjusted estimates and their precision (eg, 95% confidence interval). Make clear which confounders were adjusted for and why they were included                                                                                                                                                                                                                                                                                                                                                                                                                                                                                                                                                                                                                                                                                                                                                                                                                                                                                                                                                                                                                                             |

|                   |    |                                                                                                                                                                                                                                                                                                                                                                                                                                                                                                                                                                                                                                                                                                                                                                                                                                                                                                                                                                                                                                                                                                                                                                                                                                                                                                                                                                                                                                                                                                                                                                                                                                                                                                                                        |
|-------------------|----|----------------------------------------------------------------------------------------------------------------------------------------------------------------------------------------------------------------------------------------------------------------------------------------------------------------------------------------------------------------------------------------------------------------------------------------------------------------------------------------------------------------------------------------------------------------------------------------------------------------------------------------------------------------------------------------------------------------------------------------------------------------------------------------------------------------------------------------------------------------------------------------------------------------------------------------------------------------------------------------------------------------------------------------------------------------------------------------------------------------------------------------------------------------------------------------------------------------------------------------------------------------------------------------------------------------------------------------------------------------------------------------------------------------------------------------------------------------------------------------------------------------------------------------------------------------------------------------------------------------------------------------------------------------------------------------------------------------------------------------|
|                   |    | <p>We did not adjust for any confounders. Precision was 70% for the sensitivity analysis and the 95% confidence interval levels have been included. .</p>                                                                                                                                                                                                                                                                                                                                                                                                                                                                                                                                                                                                                                                                                                                                                                                                                                                                                                                                                                                                                                                                                                                                                                                                                                                                                                                                                                                                                                                                                                                                                                              |
| Other analyses    | 17 | <p>We have performed a subgroup analysis of energy intake. This analysis enabled us to confirm that the risk factors were uniformly distributed between the two groups.</p>                                                                                                                                                                                                                                                                                                                                                                                                                                                                                                                                                                                                                                                                                                                                                                                                                                                                                                                                                                                                                                                                                                                                                                                                                                                                                                                                                                                                                                                                                                                                                            |
| <b>Discussion</b> |    |                                                                                                                                                                                                                                                                                                                                                                                                                                                                                                                                                                                                                                                                                                                                                                                                                                                                                                                                                                                                                                                                                                                                                                                                                                                                                                                                                                                                                                                                                                                                                                                                                                                                                                                                        |
| Key results       | 18 | <p>243 participants were recruited and 133 participants had risk factors for refeeding syndrome. Three participants developed refeeding syndrome despite receiving hypocaloric nutrition and preventative treatment to reduce the risk of the syndrome occurring. Occurrence of refeeding syndrome was difficult to predict which suggests that the risk factors used to predict the syndrome are weak predictors. Refeeding syndrome was a survivable phenomena with two participants admitted to the ICU and one treated on the ward.</p> <p>The study objectives were achieved. The primary outcome of occurrence of the refeeding syndrome was determined. The secondary outcome of sensitivity and specificity of the risk factors for predicting refeeding syndrome were determined. The tertiary outcome of mortality due to refeeding syndrome was found to be weak.</p>                                                                                                                                                                                                                                                                                                                                                                                                                                                                                                                                                                                                                                                                                                                                                                                                                                                       |
| Limitations       | 19 | <p>The main limitation of this study was that only three cases of refeeding syndrome were diagnosed. This small number of cases severely limited the statistical analyses that we could perform. We could not separate the effect of the medical teams prescribing early electrolytes which may have reduced the occurrence of refeeding syndrome.</p> <p>The electrolyte threshold values could be viewed as being too low to capture all cases. However, we determined that the chosen serum electrolyte thresholds would allow the researchers to confirm positive cases with complete confidence. The 157 participants that were not recruited represented a loss of data that might have influenced the results of this study. However, this aspect of none recruitment is a feature of all cohort studies.</p> <p>A limitation of this study, and the literature base, is that we do not have a similar design study methodology to compare our results to. Our results indicate that the risk factors for predicting refeeding syndrome were weak and therefore the practice of slow, hypocaloric nutrition may increase the risk of malnutrition. However, we accept that our results are only relevant to the cohort studied within one institution and influenced by the decisions of the medical teams in that institution.</p> <p>Our study raises the question for clinicians, should they take a preventative approach to feeding patients and continue to provide slow hypocaloric feeding? Or should they feed as normal and treat when symptoms of refeeding syndrome occur? A key finding of this research was that mortality due to refeeding syndrome can be prevented by early serum electrolyte replacement.</p> |
| Interpretation    | 20 | <p>Occurrence of serum phosphate &lt;0.5 mmol/L in this study was 3% at day one and 6% at day three which was higher than that reported in a general adult hospital population of 0.2% to 2%. This may have been due to the cohort containing a sample of participants from HDU and ICU. Very few participants developed severe electrolyte shifts although moderate serum concentrations of potassium, phosphate and magnesium occurred. The interpretation of the</p>                                                                                                                                                                                                                                                                                                                                                                                                                                                                                                                                                                                                                                                                                                                                                                                                                                                                                                                                                                                                                                                                                                                                                                                                                                                                |

1 moderate electrolyte shifts, without symptoms of the syndrome, was cellular  
 2 uptake of electrolytes in response to nutritional input. The subgroup analysis  
 3 identified many participants with malnutrition profiles for the syndrome.  
 4 Hypocaloric nutritional treatment may have prevented refeeding syndrome in  
 5 some of these participants. However, the subgroup analysis revealed one  
 6 group received more energy sooner and for longer but did not develop  
 7 symptoms. This finding supports our interpretation that the risk factors for  
 8 predicting the syndrome are weak and the practice of hypocaloric feeding may  
 9 contribute to malnutrition.  
 10  
 11

12  
 13 The impact of intravenous dextrose infusion as a precipitating factor for  
 14 refeeding syndrome in the three cases cannot be under estimated. In starved  
 15 individuals gluconeogenesis is the predominant metabolic pathway for energy  
 16 production. Infusion of intravenous dextrose in the three participants caused  
 17 suppression of gluconeogenesis and a switch to glycolysis. This switch caused  
 18 insulin to be released causing rapid cellular uptake of serum phosphate,  
 19 potassium and magnesium electrolytes. We propose that the initial infusion of  
 20 dextrose in the three starved participants was the causal agent that triggered  
 21 the refeeding syndrome. Hypocaloric feeding failed to prevent refeeding  
 22 syndrome in these three cases for one important reason, it continued the input  
 23 of simple carbohydrates causing more insulin to be released. This explanation  
 24 is supported by other studies where intravenous dextrose infusion was  
 25 attributed to hypophosphataemia of  $<0.7$  mmol/L which progressed to  
 26 respiratory failure at serum phosphate concentration  $0.2$  mmol/L -  $0.36$   
 27 mmol/L. The results of the present study indicate that dextrose infusion should  
 28 be avoided in starved individuals who require fluid replacement and  
 29 nutritional treatment. The finding that intravenous dextrose infusion act as a  
 30 precipitator for the refeeding syndrome requires further research.  
 31  
 32

33  
 34 However, in cases where there is a clear history of chronic starvation repeat  
 35 serum electrolyte replacement may be required during the first seven to ten  
 36 days of treatment.  
 37

38  
 39 The small number of positive cases severely limited the statistical analyses  
 40 that we could perform. This small number may have been due to the medical  
 41 teams taking preventative actions to avoid refeeding syndrome. However we  
 42 suspect that the most compelling reason for the low occurrence of refeeding  
 43 syndrome was that genuine chronic starvation was absent from the majority of  
 44 the cases that were recruited for this study.

---

45 Generalisability 21 The results are applicable to adults commenced on artificial nutrition and  
 46 hydration for the first time. From a clinical importance the results are  
 47 applicable to dietitian, nutrition teams and pharmacists who prescribe nutrition  
 48 via a tube feed. From a clinical perspective we advise that individuals with a  
 49 history of chronic starvation receive repeat serum electrolyte infusion until  
 50 serum levels are stable.  
 51  
 52

53  
 54 In subjects with a history of fasting we suggest routine electrolyte replacement  
 55 as in the normal current practice.  
 56

---

#### Other information

57  
 58 Funding 22 Funding; none declared for this study.  
 59  
 60

# Please wait...

If this message is not eventually replaced by the proper contents of the document, your PDF viewer may not be able to display this type of document.

You can upgrade to the latest version of Adobe Reader for Windows®, Mac, or Linux® by visiting <http://www.adobe.com/products/acrobat/readstep2.html>.

For more assistance with Adobe Reader visit <http://www.adobe.com/support/products/acrreader.html>.

Windows is either a registered trademark or a trademark of Microsoft Corporation in the United States and/or other countries. Mac is a trademark of Apple Inc., registered in the United States and other countries. Linux is the registered trademark of Linus Torvalds in the U.S. and other countries.

# Please wait...

If this message is not eventually replaced by the proper contents of the document, your PDF viewer may not be able to display this type of document.

You can upgrade to the latest version of Adobe Reader for Windows®, Mac, or Linux® by visiting <http://www.adobe.com/products/acrobat/readstep2.html>.

For more assistance with Adobe Reader visit <http://www.adobe.com/support/products/acrreader.html>.

Windows is either a registered trademark or a trademark of Microsoft Corporation in the United States and/or other countries. Mac is a trademark of Apple Inc., registered in the United States and other countries. Linux is the registered trademark of Linus Torvalds in the U.S. and other countries.

# Please wait...

If this message is not eventually replaced by the proper contents of the document, your PDF viewer may not be able to display this type of document.

You can upgrade to the latest version of Adobe Reader for Windows®, Mac, or Linux® by visiting [http://www.adobe.com/go/reader\\_download](http://www.adobe.com/go/reader_download).

For more assistance with Adobe Reader visit <http://www.adobe.com/go/acrreader>.

Windows is either a registered trademark or a trademark of Microsoft Corporation in the United States and/or other countries. Mac is a trademark of Apple Inc., registered in the United States and other countries. Linux is the registered trademark of Linus Torvalds in the U.S. and other countries.

# Please wait...

If this message is not eventually replaced by the proper contents of the document, your PDF viewer may not be able to display this type of document.

You can upgrade to the latest version of Adobe Reader for Windows®, Mac, or Linux® by visiting [http://www.adobe.com/go/reader\\_download](http://www.adobe.com/go/reader_download).

For more assistance with Adobe Reader visit <http://www.adobe.com/go/acrreader>.

Windows is either a registered trademark or a trademark of Microsoft Corporation in the United States and/or other countries. Mac is a trademark of Apple Inc., registered in the United States and other countries. Linux is the registered trademark of Linus Torvalds in the U.S. and other countries.



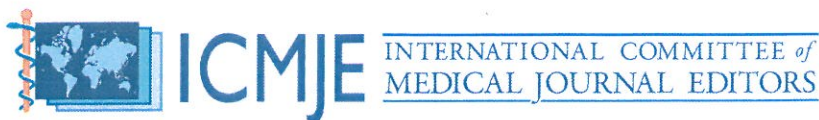

## ICMJE Form for Disclosure of Potential Conflicts of Interest

### Section 1. Identifying Information

1. Given Name (First Name) NIGEL      2. Surname (Last Name) SMEETON      3. Effective Date (07-August-2008) 11-August-2011
4. Are you the corresponding author?     Yes     No
5. Manuscript Title  
PREVALENCE OF REFEEDING SYNDROME IN ADULTS COMMENCED ON ARTIFICIAL NUTRITION AND HYDRATION: PROSPECTIVE COHORT STUDY
6. Manuscript Identifying Number (if you know it)

### Section 2. The Work Under Consideration for Publication

Did you or your institution at any time receive payment or services from a third party for any aspect of the submitted work (including but not limited to grants, data monitoring board, study design, manuscript preparation, statistical analysis, etc...)?

Complete each row by checking "No" or providing the requested information. If you have more than one relationship click the "Add" button to add a row. Excess rows can be removed by clicking the "X" button.

| The Work Under Consideration for Publication                                                                                            |                                     |                          |                            |                |            |     |
|-----------------------------------------------------------------------------------------------------------------------------------------|-------------------------------------|--------------------------|----------------------------|----------------|------------|-----|
| Type                                                                                                                                    | No                                  | Money Paid to You        | Money to Your Institution* | Name of Entity | Comments** |     |
| 1. Grant                                                                                                                                | <input checked="" type="checkbox"/> | <input type="checkbox"/> | <input type="checkbox"/>   |                |            | X   |
|                                                                                                                                         |                                     |                          |                            |                |            | ADD |
| 2. Consulting fee or honorarium                                                                                                         | <input checked="" type="checkbox"/> | <input type="checkbox"/> | <input type="checkbox"/>   |                |            | X   |
|                                                                                                                                         |                                     |                          |                            |                |            | ADD |
| 3. Support for travel to meetings for the study or other purposes                                                                       | <input checked="" type="checkbox"/> | <input type="checkbox"/> | <input type="checkbox"/>   |                |            | X   |
|                                                                                                                                         |                                     |                          |                            |                |            | ADD |
| 4. Fees for participation in review activities such as data monitoring boards, statistical analysis, end point committees, and the like | <input checked="" type="checkbox"/> | <input type="checkbox"/> | <input type="checkbox"/>   |                |            | X   |
|                                                                                                                                         |                                     |                          |                            |                |            | ADD |
| 5. Payment for writing or reviewing the manuscript                                                                                      | <input checked="" type="checkbox"/> | <input type="checkbox"/> | <input type="checkbox"/>   |                |            | X   |
|                                                                                                                                         |                                     |                          |                            |                |            | ADD |
| 6. Provision of writing assistance, medicines, equipment, or administrative support                                                     | <input checked="" type="checkbox"/> | <input type="checkbox"/> | <input type="checkbox"/>   |                |            | X   |

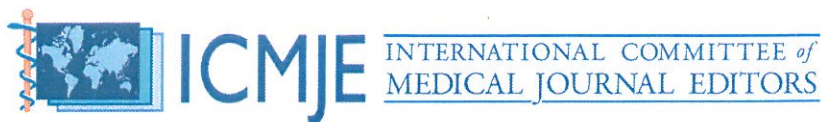

## ICMJE Form for Disclosure of Potential Conflicts of Interest

| The Work Under Consideration for Publication |                                     |                          |                            |                |            |     |
|----------------------------------------------|-------------------------------------|--------------------------|----------------------------|----------------|------------|-----|
| Type                                         | No                                  | Money Paid to You        | Money to Your Institution* | Name of Entity | Comments** |     |
| 7. Other                                     | <input checked="" type="checkbox"/> | <input type="checkbox"/> | <input type="checkbox"/>   |                |            | ADD |
|                                              |                                     |                          |                            |                |            | X   |
|                                              |                                     |                          |                            |                |            | ADD |

\* This means money that your institution received for your efforts on this study.

\*\* Use this section to provide any needed explanation.

### Section 3. Relevant financial activities outside the submitted work.

Place a check in the appropriate boxes in the table to indicate whether you have financial relationships (regardless of amount of compensation) with entities as described in the instructions. Use one line for each entity; add as many lines as you need by clicking the "Add +" box. You should report relationships that were present during the 36 months prior to submission.

Complete each row by checking "No" or providing the requested information. If you have more than one relationship click the "Add" button to add a row. Excess rows can be removed by clicking the "X" button.

| Relevant financial activities outside the submitted work      |                                     |                          |                            |        |          |     |
|---------------------------------------------------------------|-------------------------------------|--------------------------|----------------------------|--------|----------|-----|
| Type of Relationship (in alphabetical order)                  | No                                  | Money Paid to You        | Money to Your Institution* | Entity | Comments |     |
| 1. Board membership                                           | <input checked="" type="checkbox"/> | <input type="checkbox"/> | <input type="checkbox"/>   |        |          | X   |
|                                                               |                                     |                          |                            |        |          | ADD |
| 2. Consultancy                                                | <input checked="" type="checkbox"/> | <input type="checkbox"/> | <input type="checkbox"/>   |        |          | X   |
|                                                               |                                     |                          |                            |        |          | ADD |
| 3. Employment                                                 | <input checked="" type="checkbox"/> | <input type="checkbox"/> | <input type="checkbox"/>   |        |          | X   |
|                                                               |                                     |                          |                            |        |          | ADD |
| 4. Expert testimony                                           | <input checked="" type="checkbox"/> | <input type="checkbox"/> | <input type="checkbox"/>   |        |          | X   |
|                                                               |                                     |                          |                            |        |          | ADD |
| 5. Grants/grants pending                                      | <input checked="" type="checkbox"/> | <input type="checkbox"/> | <input type="checkbox"/>   |        |          | X   |
|                                                               |                                     |                          |                            |        |          | ADD |
| 6. Payment for lectures including service on speakers bureaus | <input checked="" type="checkbox"/> | <input type="checkbox"/> | <input type="checkbox"/>   |        |          | X   |
|                                                               |                                     |                          |                            |        |          | ADD |
| 7. Payment for manuscript preparation                         | <input checked="" type="checkbox"/> | <input type="checkbox"/> | <input type="checkbox"/>   |        |          | X   |

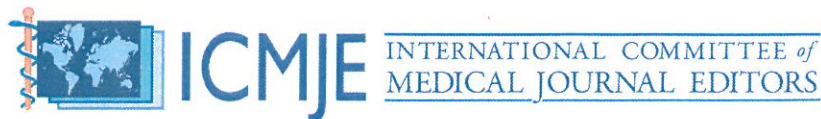

## ICMJE Form for Disclosure of Potential Conflicts of Interest

| Relevant financial activities outside the submitted work                    |                                     |                          |                            |        |          |     |
|-----------------------------------------------------------------------------|-------------------------------------|--------------------------|----------------------------|--------|----------|-----|
| Type of Relationship (in alphabetical order)                                | No                                  | Money Paid to You        | Money to Your Institution* | Entity | Comments |     |
| 8. Patents (planned, pending or issued)                                     | <input checked="" type="checkbox"/> | <input type="checkbox"/> | <input type="checkbox"/>   |        |          | ADD |
|                                                                             |                                     |                          |                            |        |          | X   |
|                                                                             |                                     |                          |                            |        |          | ADD |
| 9. Royalties                                                                | <input checked="" type="checkbox"/> | <input type="checkbox"/> | <input type="checkbox"/>   |        |          | X   |
|                                                                             |                                     |                          |                            |        |          | ADD |
| 10. Payment for development of educational presentations                    | <input checked="" type="checkbox"/> | <input type="checkbox"/> | <input type="checkbox"/>   |        |          | X   |
|                                                                             |                                     |                          |                            |        |          | ADD |
| 11. Stock/stock options                                                     | <input checked="" type="checkbox"/> | <input type="checkbox"/> | <input type="checkbox"/>   |        |          | X   |
|                                                                             |                                     |                          |                            |        |          | ADD |
| 12. Travel/accommodations/meeting expenses unrelated to activities listed** | <input checked="" type="checkbox"/> | <input type="checkbox"/> | <input type="checkbox"/>   |        |          | X   |
|                                                                             |                                     |                          |                            |        |          | ADD |
| 13. Other (err on the side of full disclosure)                              | <input checked="" type="checkbox"/> | <input type="checkbox"/> | <input type="checkbox"/>   |        |          | X   |
|                                                                             |                                     |                          |                            |        |          | ADD |

\* This means money that your institution received for your efforts.

\*\* For example, if you report a consultancy above there is no need to report travel related to that consultancy on this line.

### Section 4. Other relationships

Are there other relationships or activities that readers could perceive to have influenced, or that give the appearance of potentially influencing, what you wrote in the submitted work?

No other relationships/conditions/circumstances that present a potential conflict of interest

Yes, the following relationships/conditions/circumstances are present (explain below):

At the time of manuscript acceptance, journals will ask authors to confirm and, if necessary, update their disclosure statements. On occasion, journals may ask authors to disclose further information about reported relationships.

Hide All Table Rows Checked 'No'

SAVE

*N.C. Smeeton*

*11th August 2011*

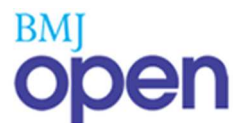

**Occurrence of refeeding syndrome in adults commenced on artificial nutrition support: prospective cohort study.**

|                                 |                                                                                                                                                                                                                                                                                                                                                                                  |
|---------------------------------|----------------------------------------------------------------------------------------------------------------------------------------------------------------------------------------------------------------------------------------------------------------------------------------------------------------------------------------------------------------------------------|
| Journal:                        | <i>BMJ Open</i>                                                                                                                                                                                                                                                                                                                                                                  |
| Manuscript ID:                  | bmjopen-2012-002173.R1                                                                                                                                                                                                                                                                                                                                                           |
| Article Type:                   | Research                                                                                                                                                                                                                                                                                                                                                                         |
| Date Submitted by the Author:   | 19-Nov-2012                                                                                                                                                                                                                                                                                                                                                                      |
| Complete List of Authors:       | Rio, Alan; King's College Hospital, Nutrition and Dietetics<br>Whelan, Kevin; Kings College Lonodn, Diabetes and Nutritional Sciences<br>Goff, Louise; Kings College Lonodn, Diabetes and Nutritional Sciences<br>Reidlinger, Dianne; Kings College Lonodn, Diabetes and Nutritional Sciences<br>Smeeton, Nigel; Kings College London, Imaging Sciences & Biomedical Engineering |
| <b>Primary Subject Heading</b>: | Nutrition and metabolism                                                                                                                                                                                                                                                                                                                                                         |
| Secondary Subject Heading:      | Medical management, Diagnostics, Evidence based practice                                                                                                                                                                                                                                                                                                                         |
| Keywords:                       | NUTRITION & DIETETICS, Nutritional support < GASTROENTEROLOGY, Eating disorders < PSYCHIATRY                                                                                                                                                                                                                                                                                     |
|                                 |                                                                                                                                                                                                                                                                                                                                                                                  |

SCHOLARONE™  
Manuscripts

1  
2 **Manuscript ID bmjopen-2012-002173**  
3

4 Title. Occurrence of refeeding syndrome in adults commenced on **artificial nutrition support:**  
5  
6 prospective cohort study.  
7  
8  
9

10  
11  
12  
13 Alan Rio, Kevin Whelan, Louise Goff, Dianne Reidlinger, Nigel Smeeton.  
14

15  
16 Alan Rio, Nutrition and Dietetic Department, King's College Hospital, Denmark Hill, London, SE5 9RS,  
17  
18 UK. Kevin Whelan, King's College London, School of Medicine, Diabetes and Nutritional Sciences  
19  
20 Division, London, SE1 9NH, UK. Louise Goff, King's College London, School of Medicine, Diabetes and  
21  
22 Nutritional Sciences Division, London, SE1 9NH, UK. Dianne Reidlinger, King's College London,  
23  
24 School of Medicine, Diabetes and Nutritional Sciences Division, London, SE1 9NH, UK, Nigel Smeeton,  
25  
26 King's College London, Division of Imaging Sciences & Biomedical Engineering, London, SE1 7EH, UK.  
27  
28  
29  
30  
31  
32  
33

34 Correspondence to: A Rio, Alan.Rio.1@city.ac.uk  
35  
36  
37  
38  
39  
40  
41  
42  
43  
44  
45  
46  
47  
48  
49  
50  
51  
52  
53  
54  
55  
56  
57  
58  
59  
60

## Article Summary

### Article focus

Hypothesis: The risk factors for the refeeding syndrome are weak and cause unnecessary delay of nutrition.

Research question: Which risk factors reliably predict development of the refeeding syndrome?

### Key messages

- Refeeding syndrome is a complex constellation of major characteristics which requires a multi-facet diagnostic criteria.
- Refeeding syndrome is a rare, survivable phenomena that can occur despite identification of risk and hypocaloric nutritional treatment.
- Intravenous glucose infusion prior to artificial nutrition support can precipitate the refeeding syndrome.
- Starvation is the most reliable predictor for onset of the syndrome.

### Strengths and limitations of this study

The authors were not involved in the nutritional treatment, electrolyte supplementation or diagnosis of the refeeding syndrome. The diagnostic criteria provided unequivocal confirmation of the refeeding syndrome and omitted borderline results. The main source of data loss was the excluded group which may potentially have contained participants who went on to develop the refeeding syndrome.

**Abstract**

Background Refeeding syndrome is a potentially life threatening condition characterised by severe intracellular electrolyte shifts, acute circulatory fluid overload and organ failure. The initial symptoms are non specific but early clinical features are severely low serum electrolyte concentrations of potassium, phosphate or magnesium. Risk factors for the syndrome include starvation, chronic alcoholism, anorexia nervosa and surgical interventions that require lengthy periods of fasting. The causes of the refeeding syndrome are excess or unbalanced enteral, parenteral or oral nutritional intake. Prevention of the syndrome includes identification of individuals at risk, controlled hypocaloric nutritional intake and supplementary electrolyte replacement.

**Objective** To determine the occurrence of refeeding syndrome in adults commenced on artificial nutrition support.

**Design** Prospective cohort study.

**Setting** Large, single site university teaching hospital. Recruitment period 2007-2009.

**Participants** 243 adults commenced on artificial nutrition support for the first time during that admission recruited from wards and intensive care.

**Main outcome measures** Primary outcome: Occurrence of the refeeding syndrome. Secondary outcome: Analysis of the risk factors which predict the refeeding syndrome. Tertiary outcome: Mortality due to refeeding syndrome and all cause mortality.

**Results** 133 participants had one or more of the following risk factors: BMI  $< 16 - 18.5 \geq$  ( $\text{kg}/\text{m}^2$ ), unintentional weight loss  $>15\%$  in the preceding three – six months, very little or no nutritional intake  $>10$  days, history of alcohol or drug abuse and low baseline levels of serum potassium, phosphate or magnesium prior to recruitment. Poor nutritional intake for more than 10 days, weight loss  $>15\%$  prior to recruitment and low serum magnesium level at baseline predicted the refeeding syndrome with a sensitivity of 66.7%: specificity was  $>80\%$  apart from weight loss of  $>15\%$  which was 59.1%. Baseline low serum magnesium was an independent predictor of the refeeding syndrome ( $p=0.021$ ). Three participants (2% 3/243) developed severe electrolyte shifts, acute circulatory fluid overload and

1  
2 disturbance to organ function following artificial nutrition support and were diagnosed with refeeding  
3 syndrome. There were no deaths attributable to the refeeding syndrome but (5.3% 13/243) participants  
4 died during the feeding period and (28% 68/243) died during the hospital admission. Death of these  
5  
6 participants was due to cerebrovascular accident, traumatic injury, respiratory failure, organ failure or end  
7  
8 of life causes.  
9  
10

11  
12 Conclusion Refeeding syndrome was a rare, survivable phenomenon that occurred during hypocaloric  
13 nutrition support in participants identified at risk. Independent predictors for refeeding syndrome were  
14 starvation and baseline low serum magnesium concentration. Intravenous carbohydrate infusion prior to  
15 artificial nutrition support may have precipitated the onset of the syndrome.  
16  
17  
18  
19  
20  
21  
22  
23

## 24 Introduction

25  
26 Refeeding syndrome has been defined as severe fluid and electrolyte shifts in malnourished patients  
27 during oral, enteral or parenteral refeeding.<sup>1</sup> A key risk factor for the syndrome is starvation with early  
28 published reports being prisoners of war.<sup>2</sup> In recent times refeeding syndrome has been confirmed in  
29 hunger strikers, individuals with anorexic nervosa and chronic alcoholics. The modern definition of  
30 refeeding syndrome is life threatening severely low serum electrolyte concentrations, fluid and electrolyte  
31 imbalance and disturbance of organ function resulting from over rapid or unbalanced nutrition support.<sup>3</sup>  
32  
33 However, this definition is imprecise and lacks definitive electrolyte threshold values to confidently  
34 diagnose the refeeding syndrome.  
35  
36  
37  
38  
39  
40  
41  
42  
43  
44  
45

46 The metabolic shift from starvation to feeding increases cellular uptake of glucose, potassium, phosphate  
47 and magnesium which lowers the serum concentration of these electrolytes.<sup>4</sup> The early signs of the  
48 refeeding syndrome are non specific but include severely low serum electrolyte concentrations of serum  
49 phosphate, potassium and magnesium which if untreated can progress to acute circulatory fluid overload,  
50 respiratory compromise and cardiac failure.<sup>5</sup> Severe hypophosphataemia has been described as the  
51 hallmark of refeeding syndrome.  
52  
53  
54  
55  
56  
57  
58  
59  
60



1  
2  
3  
4 Guidelines for the prevention and treatment of refeeding syndrome advise identification of individuals at  
5 risk, controlled hypocaloric nutritional treatment and supplementary electrolytes.<sup>3</sup> However, not all  
6 individuals with risk factors for refeeding syndrome develop symptoms during nutritional repletion.<sup>6</sup> A  
7 potential consequence of adherence to these untested guidelines is the delay of adequate nutrition to  
8 undernourished individuals. We conducted a prospective cohort study to determine the occurrence of  
9 refeeding syndrome in adults commenced on artificial nutrition support. Refeeding syndrome was  
10 confirmed using a three facet diagnostic criteria of defined severely low serum electrolyte concentrations,  
11 acute circulatory fluid overload and organ dysfunction.

## 12 **Methods**

### 13 **Study design**

14 This was a prospective cohort study conducted at a large, single site university teaching hospital. Criteria  
15 to determine risk of refeeding syndrome is displayed in Box 1. The risk factors were Body Mass Index  
16 (BMI) < 16 (kg/m<sup>2</sup>), unintentional weight loss >15% in the preceding three – six months, very little or no  
17 nutritional intake for more than 10 days and low levels of serum potassium, phosphate or magnesium prior  
18 to artificial nutrition support. The three facet diagnostic criteria used by the research team to confirm  
19 refeeding syndrome is displayed in Box 2. Each participant's medical team diagnosed refeeding syndrome  
20 using serum electrolyte shifts and observed clinical complications of acute circulatory fluid overload and  
21 organ dysfunction. The medical teams documented this information in the participant's medical record as  
22 daily clinical observations and treatment. The research team used the participant's medical record to  
23 confirm that symptoms occurred from the onset of artificial nutrition support recording observations daily  
24 and serum electrolyte concentrations every third day from baseline. For each participant diagnosed with  
25 refeeding syndrome the research team compared the serum electrolyte concentrations, the acute  
26 circulatory fluid overload and organ dysfunction against the three facet diagnostic criteria. All three facets  
27 of the diagnostic criteria were required by the research team to unequivocally confirm the diagnosis of  
28 refeeding syndrome. To avoid any potential bias the authors were not involved in nutritional treatment,  
29  
30  
31  
32  
33  
34  
35  
36  
37  
38  
39  
40  
41  
42  
43  
44  
45  
46  
47  
48  
49  
50  
51  
52  
53  
54  
55  
56  
57  
58  
59  
60

1  
2 electrolyte supplementation or the initial diagnosis of refeeding syndrome during the study period. The  
3  
4 schematic for participant exclusion, recruitment and analysis is displayed in Flow chart 1.  
5

### 6 7 **Sample size**

8  
9 The sample size was estimated from the reported prevalence of refeeding syndrome, defined as  
10  
11 hypophosphataemia  $<0.4$  mmol/L, to be 1 - 10%.<sup>7-8</sup> A cohort of 240 would produce between 2 - 24  
12  
13 potential participants meeting the diagnostic criteria.  
14

### 15 16 **Participants**

17  
18 Participants commenced on enteral or parenteral artificial nutrition support were eligible to be recruited if  
19  
20 they met the inclusion criteria. The inclusion criteria was: adults  $>18$  years of age commenced on  
21  
22 artificial nutrition support for the first time during that hospital admission. Exclusion criteria were:  
23  
24 previous artificial nutrition support during the hospital admission, artificial nutrition support commenced  
25  
26 at the previous institution, participants  $<18$  years of age or failure to obtain consent/assent due to serious  
27  
28 illness or lack of next of kin. Informed consent was obtained from participants or next of kin prior to  
29  
30 enrolment. Study participation was for the duration of artificial nutrition support to a maximum of 15  
31  
32 consecutive days. All participants were recruited within 48 hours of the commencement of artificial  
33  
34 nutrition support with enteral or parenteral feeding. Energy prescriptions for each participant were  
35  
36 estimated by the dietetic speciality who used basal metabolic rate and stress related factors.<sup>9</sup> The hospital  
37  
38 nutrition policy for adults with risk factors for refeeding syndrome was 800 kcal day or 50% of estimated  
39  
40 adult energy requirements.  
41  
42  
43

### 44 45 **Outcome measures**

46  
47 The primary outcome of interest in this study was the occurrence of refeeding syndrome. The secondary  
48  
49 outcome was analysis of the risk factor at predicting refeeding syndrome. The tertiary outcome measure  
50  
51 was mortality due to refeeding syndrome and all cause mortality.  
52

### 53 54 **Data Collection**

55  
56 Baseline serum electrolyte concentrations were recorded within 24 hours of study enrolment then every  
57  
58 third day for a maximum of 15 days during the period of artificial nutrition support. Serum electrolytes  
59  
60

1  
2 were not recorded when artificial nutrition support was stopped. Serum electrolyte concentrations were  
3  
4 obtained from the hospital electronic in-patient system (iSoft, v1.0 Oxon, England). The normal hospital  
5  
6 adult serum reference ranges were potassium 3.5 – 5.0 mmol/L, phosphate 0.8 – 1.4 mmol/L and  
7  
8 magnesium 0.7 – 1.00 mmol/L. Body weight (kg) was measured using balance and digital scales accurate  
9  
10 to within 0.1kg (Seca, 22089 Hamburg, Germany) wearing light indoor clothing. Body weight was not  
11  
12 recorded in participants who were sedated or unconscious. Height (m) was recorded using measured or  
13  
14 recalled data as appropriate. Body mass index ( $\text{kg}/\text{m}^2$ ) and percentage weight loss (normal body weight -  
15  
16 current body weight/normal body weight x 100) were calculated. To determine which participants had  
17  
18 poor nutritional intake prior to artificial nutrition support, dietary caloric intake was calculated by a  
19  
20 research assistant. Each participant was asked to recall their dietary food and fluid intake in the 10 days  
21  
22 preceding recruitment into the study. Food portion sizes were estimated from a reference guide<sup>10</sup> and total  
23  
24 daily energy intake was calculated using a nutritional analysis software package, (Compeat, Oxon,  
25  
26 England)<sup>11</sup> Participants unable to provide a diet history the next of kin was interviewed, failing this  
27  
28 retrospective food intake records were used.  
29  
30  
31  
32

### 33 **Data Analysis**

34  
35 Descriptive statistics were performed on the entire cohort of 243 participants to obtain diagnostic data,  
36  
37 electrolyte supplementation and caloric intake. Each participant was classified at risk or not at risk of  
38  
39 refeeding syndrome as per the diagnostic criteria displayed in Box 2. Sensitivity and specificity values for  
40  
41 refeeding syndrome were calculated for the entire cohort of 243 participants. The precision of the  
42  
43 sensitivity and specificity analysis was set at 70%. Predictor variables were transformed to binary  
44  
45 categories representing whether or not refeeding syndrome had been diagnosed. The refeeding syndrome  
46  
47 outcomes were analysed using Fisher's exact test at the  $p < 0.05$  level. A subgroup analysis of the 133  
48  
49 participants with risk factors for refeeding syndrome was performed to provide data on the secondary  
50  
51 outcome measure of the study. This subgroup analysis stratified these 133 participants according to their  
52  
53 baseline energy intake as: Group 1  $< 800$  kcal day versus Group 2  $> 800$  kcal day, Flow chart 1. This  
54  
55 stratification of baseline energy intake allowed hypocaloric versus normal caloric intake to be analysed.  
56  
57  
58  
59  
60

1  
2 There was no further analysis of the 110 participants without risk factors who did not develop symptoms  
3 of the syndrome. All data analysis was performed using SPSS version 17 (Chicago, IL, US).  
4  
5

## 6 **Results**

7  
8 Four hundred and eighty four participants were eligible to be recruited, displayed in Flow chart 1. A total  
9 of 243 participants were recruited median age 57.0 years (interquartile range 44.0 – 69.0), sex 130  
10 (53.5%) men. There were 133 participants with risk factors for refeeding syndrome of which 68 were men.  
11 Recruitment locations were wards 153 (63.0%), high dependency unit 46 (18.9%) and intensive care 44  
12 (18.1%), see Table 1. In total 212 (87.2%) participants received enteral, 23 (9.5%) participants parenteral  
13 and 8 (3.3%) received enteral/parenteral tube feeding. There were 2615 total feed days, median duration  
14 13 days (interquartile range 6-15). A total of 2765 serum electrolyte results were recorded, 1014 for  
15 potassium, 1006 for phosphate and 745 for magnesium. The total number of participants who received  
16 electrolyte supplementation were potassium 71, magnesium 52 and phosphate. Occurrence of moderate  
17 and severely low serum electrolyte concentration with mortality is displayed in Table 2. Mortality was not  
18 attributed to refeeding syndrome either during feeding (5.3%, 13/243) or hospital admission (28%  
19 68/243). Cause of death in these participants was due to underlying disease with mortality by location:  
20 ward 45/153, high dependency unit 14/46 and intensive care 9/44.  
21  
22  
23  
24  
25  
26  
27  
28  
29  
30  
31  
32  
33  
34  
35  
36  
37  
38  
39

40 Using the criteria in Box 2 the research team confirmed the diagnosis of refeeding syndrome in three  
41 participants, asymptomatic electrolyte depletion in two participants and the remaining 238 participants did  
42 not develop symptoms. Poor nutritional intake for more than 10 days, weight loss >15% prior to  
43 recruitment and a low serum magnesium level at baseline had sensitivity values of 66.7%. By contrast, all  
44 specificity values were high (>80%) apart from weight loss >15%, which had a specificity of 59.1%. Low  
45 baseline serum magnesium (p=0.021) independently predicted refeeding syndrome: other independent  
46 variables were not significantly associated. The pre-existing risk factors for refeeding syndrome within  
47 groups one and two are displayed in Table 3. Characteristics of the three participants diagnosed with  
48  
49  
50  
51  
52  
53  
54  
55  
56  
57  
58  
59  
60

1  
2 refeeding syndrome are displayed in Table 4. Number of participants in the two risk groups that received  
3  
4 electrolyte supplementation is displayed in Table 5.  
5  
6  
7

### 8 **Participant diagnosed with refeeding syndrome**

9  
10 Participant X, a 48 year female who presented with confusion, bilateral leg weakness, alcohol withdrawal,  
11  
12 poor nutritional intake with repeat vomiting for seven days, C2 fracture, translocation at C2/3 and high  
13  
14 urinary ketones. The participant received two intravenous doses of a standard vitamins B and C  
15  
16 **formulation** in 0.9% sodium chloride followed by 100 mg oral thiamine. Day two the patient received  
17  
18 one litre of intravenous potassium chloride and two litres of 5% glucose followed by enteral tube feeding.  
19  
20 Day three serum phosphate was recorded at 0.33 mol/L and 50 mmol/L intravenous phosphate in 500ml  
21  
22 was infused over 12 hours. At day four the participant developed peripheral oedema with tachycardia and  
23  
24 was transferred to the intensive care unit due to respiratory failure and acute circulatory fluid overload.  
25  
26  
27  
28

29  
30 Participant Y, a 23 year old female, with Crohn's disease and subtotal bowel colectomy presented with  
31  
32 frontal occipital headaches radiating to neck with history of nausea, vomiting and weight loss of 26kg. At  
33  
34 day 117 of admission a nasogastric tube was inserted due to poor nutritional intake. Nutrition was stopped  
35  
36 within two hours due to vomiting and abdominal pain. The participant collapsed 24 hours later due to  
37  
38 hypotension, hypothermia, dehydration and pseudo-bowel obstruction. The participant was transferred to  
39  
40 the high dependency unit for fluid resuscitation. Intravenous 10% glucose was commenced and a 16Fr  
41  
42 wide bore nasogastric tube was inserted for gastric drainage. Day two serum electrolytes levels were  
43  
44 potassium 3.2 mmol/L, phosphate 0.26 mmol/L, magnesium 0.55 mmol/L. Intravenous phosphate  
45  
46 replacement was commenced with 50 mmol/L phosphate in 500ml. The participant was transferred to the  
47  
48 intensive care unit, intubated and commenced on haemofiltration due to multi-organ failure.  
49  
50  
51  
52

53  
54 Participant Z, a 31 year old female, with decompensated liver cirrhosis secondary to alcohol, with existing  
55  
56 chronic pancreatitis and opiate dependency with a weekly alcohol intake of 56 units was admitted to the  
57  
58  
59  
60

1  
2 hepatology unit with abdominal pain, vomiting and dehydration. Usual body weight was 48kg, admission  
3  
4 dry weight was 40kg. The participant received a standard formulation of vitamins B and C followed by  
5  
6 one litre of 5% glucose containing 20mmol/L potassium chloride. Oral thiamine 100 mg and oral vitamin  
7  
8 B compound were prescribed. The participant had a nasogastric tube inserted for artificial nutrition  
9  
10 support. At day three serum electrolytes were potassium 2.5 mmol/L, phosphate 0.37 mmol/L, magnesium  
11  
12 0.56 mmol/L. The participant developed acute circulatory fluid overload, symptoms of tachycardia and  
13  
14 pneumonia. The participant was given 50 mmol/L intravenous phosphate in 500ml infused over 12 hours  
15  
16 in one litre of 5% glucose, 25mmol magnesium and a repeat intravenous dose of a standard vitamin B and  
17  
18 C formulation.  
19  
20  
21

## 22 **Discussion**

23  
24 This study applied a three facet diagnostic criteria to confirm the occurrence of refeeding syndrome in  
25  
26 adults commenced on artificial nutrition support. This unequivocal clinical diagnostic criteria comprised:  
27  
28 defined severe serum electrolyte concentrations, acute circulatory fluid overload and organ dysfunction.  
29  
30 These symptoms occurred within 72 hours of hypocaloric artificial nutrition support in three participants  
31  
32 identified at risk. Two participants developed respiratory failure and multi-organ failure and required  
33  
34 admission to the intensive care unit whilst the third participant, who developed acute circulatory fluid  
35  
36 overload and tachycardia, was treated on the ward. The survival of these three participants represents  
37  
38 advances in the medical management of severely malnourished individuals compared to the fatal  
39  
40 outcomes of early reports.<sup>2,5</sup> This study does not support previous reports that refeeding syndrome can be  
41  
42 prevented by identification of risk and treatment with hypocaloric feeding. In this study refeeding  
43  
44 syndrome occurred in three participants who had been identified at risk and treated with hypocaloric  
45  
46 feeding. Risk factors distinct to the three refeeding syndrome participants were a history of starvation and  
47  
48 baseline low serum magnesium concentration. Two of the three participants received an intravenous dose  
49  
50 of standard vitamins B and C formulation prior to artificial nutrition support which may have prevented  
51  
52 Wernicke's encephalopathy. The small number of participants diagnosed with refeeding syndrome in this  
53  
54 study may have been due to the medical teams having a policy of early electrolyte replacement. However,  
55  
56  
57  
58  
59  
60

1  
2 we suspect that the most compelling reason for the low occurrence of refeeding syndrome in this study  
3  
4 was that starvation was a characteristic of only three participants. The analysis of the two subgroups  
5  
6 showed strikingly similar malnutrition profiles but substantially different energy intakes. We interpret this  
7  
8 to suggest that for refeeding syndrome to occur a risk factor was required. The compelling risk factor of  
9  
10 the three diagnosed participants was starvation. This interpretation is supported by the analysis of those  
11  
12 participants who reported a short period of fasting prior to artificial nutrition support and experienced  
13  
14 moderate falls in their serum electrolyte concentrations.  
15  
16

### 17 18 19 20 **Strengths and weaknesses of the study**

21  
22 The results of this study should be interpreted with caution. The study was not designed to assess the  
23  
24 mechanism of refeeding syndrome. The strengths of the study were the standardised diagnostic criteria,  
25  
26 the risk factor analysis and comparison of the hypocaloric and normal caloric nutrition groups. The results  
27  
28 have a limited external validity due to the inherent bias of the narrow selection criteria. This selection bias  
29  
30 effect and exclusion of participants who were able to take oral nutritional intake may explain the low  
31  
32 occurrence of refeeding syndrome recorded in the study population. A large number of potentially eligible  
33  
34 participants could not be recruited due to difficulty obtaining consent. A further reduction in potential  
35  
36 participants was death within 24 hours of commencing artificial nutrition support. The cause of death in  
37  
38 these participants was due to their underlying medical condition of cerebrovascular accident, traumatic  
39  
40 injury, respiratory failure due to degenerative neurological disease, organ failure or end of life causes.  
41  
42 Since death occurred within 24 hours of starting artificial nutrition support we cannot exclude  
43  
44 complications of refeeding syndrome as a contributing factor. Confusion, communication impairment and  
45  
46 cognitive problems due to refeeding syndrome may also explain why a large number of severely ill  
47  
48 individuals refused participation in this cohort study. Equally valid is the possibility that these severely ill  
49  
50 individuals refused participation due to the limited benefit inclusion in this study would provide.  
51  
52

53  
54  
55 The diagnosis of only three participants limited the statistical analyses that we could perform which  
56  
57 excluded regression analyses. The low occurrence of refeeding syndrome may have been due to the  
58  
59  
60

1  
2 medical teams taking preventative actions such as early electrolyte replacement. The severely low  
3 electrolyte concentrations may be interpreted as too low to confirm the syndrome. However, the serum  
4 electrolyte concentrations were obtained from a review of the evidence to enable an unequivocal diagnosis  
5 of refeeding syndrome. This discreet approach was taken to avoid falsely diagnosing participants with  
6 single, abnormal electrolyte concentrations. Whilst the review of evidence was consistent for severely low  
7 serum electrolyte concentrations the authors identified a lack of consensus on the electrolyte concentration  
8 values to diagnose the syndrome. To avoid bias the authors were not involved in nutritional treatment,  
9 electrolyte supplementation or the initial diagnosis of the syndrome.  
10  
11  
12  
13  
14  
15  
16  
17  
18  
19  
20  
21

## 22 Interpretation

23  
24 Occurrence of serum phosphate  $<0.5$  mmol/L in this study was 3% at day one and 6% at day three which  
25 was higher than that reported in the adult hospital population of 0.2% to 2%.<sup>7,8, 12, 13</sup> The higher occurrence  
26 of hypophosphataemia in this study may have been due to the cohort containing participants recruited  
27 from the high dependency and intensive care units. Very few participants developed severe electrolyte  
28 shifts although moderate serum concentrations of potassium, phosphate and magnesium occurred. The  
29 interpretation of the moderate electrolyte shifts, without symptoms of the syndrome, was cellular uptake  
30 of electrolytes in response to nutritional input. The subgroup analysis identified many participants with  
31 risk factors for the syndrome. Hypocaloric nutritional treatment may have prevented refeeding syndrome  
32 in some of these participants. However, the subgroup analysis revealed that one group received more  
33 energy sooner and for longer but did not develop symptoms. Applying the diagnostic criteria in Box 2  
34 revealed the risk factors<sup>3</sup> to be weak predictors of the syndrome.  
35  
36  
37  
38  
39  
40  
41  
42  
43  
44  
45  
46  
47  
48

49 The impact of intravenous glucose infusion, without adequate and repeated electrolyte replacement in the  
50 three diagnosed participants, cannot be under estimated. In starved individuals gluconeogenesis is the  
51 predominant metabolic pathway for energy production. Infusion of intravenous glucose potentially  
52 suppressed gluconeogenesis which caused a switch to glycolysis in these three participants. This switch  
53 caused insulin to be released causing rapid cellular uptake of serum phosphate, potassium and magnesium  
54  
55  
56  
57  
58  
59  
60



1  
2 electrolytes. We propose that the initial infusion of glucose in the three starved participants potentially  
3 triggered the metabolic sequence that resulted in the development of the syndrome. Hypocaloric feeding  
4 failed to prevent refeeding syndrome in these three participants for one important reason, it continued the  
5 input of simple carbohydrates causing more insulin to be released. This explanation is supported by other  
6 studies where intravenous glucose infusion was attributed to hypophosphataemia of  $<0.7$  mmol/L<sup>14</sup> which  
7 progressed to respiratory failure at serum phosphate concentration 0.2 mmol/L - 0.36 mmol/L.<sup>15-17</sup> The  
8 results of the present study indicate that glucose infusion should be avoided in starved individuals who  
9 require fluid and nutritional treatment. The finding that intravenous glucose infusion in starved individuals  
10 may initiate the refeeding syndrome requires further research. A potential hypothesis to be tested is that  
11 electrolyte replacement strategies are more effective at preventing the syndrome than caloric restriction.  
12  
13  
14  
15  
16  
17  
18  
19  
20  
21  
22  
23

#### 24 **Comparison with other studies**

25  
26 The era of hypercaloric feeding in cachectic individuals was associated with cardiac abnormalities,<sup>18</sup>  
27 respiratory failure and death.<sup>5</sup> Two decades later controlled hypocaloric nutritional treatment and  
28 electrolyte supplementation prevented refeeding syndrome in eight prisoners who had been on hunger  
29 strike for 43 days.<sup>19</sup> Under controlled conditions hypocaloric nutritional treatment and intravenous  
30 phosphate containing 25 mmol/L over 12 hours with effervescent oral phosphate (16mmol) twice daily  
31 prevented serious complications associated with refeeding syndrome in a 30 year old male who endured  
32 44 days of self imposed starvation.<sup>20</sup> Refeeding syndrome was prevented in 29 anorexic nervosa  
33 participants given 500 to 2,000 mg phosphate daily.<sup>21</sup> The energy prescription was 1,900 kcal at day one  
34 and 2,200 kcal at day three yet moderate hypophosphataemia (0.31 - 0.8 mmol/L) did not occur. These  
35 varied studies reflect the increased awareness of the syndrome where serious complications and mortality  
36 can be avoided.<sup>22-23</sup> In the present study refeeding syndrome was a rare, survivable phenomenon that  
37 occurred in starved individuals who crucially were identified at risk and treated with hypocaloric  
38 nutrition.<sup>24</sup> However, intravenous glucose infusion prior to artificial nutrition support may have triggered  
39 the onset of the refeeding syndrome.  
40  
41  
42  
43  
44  
45  
46  
47  
48  
49  
50  
51  
52  
53  
54  
55  
56  
57  
58  
59  
60

## Other information

Funding: none declared.

Contributors: AR was responsible for the conception, design, initiation and overall co-ordination of the study: AR drafted the paper, is responsible for its intellectual content, interpretation and analysis of the results. KW was involved in the design of the study, interpretation of results and writing the manuscript. NS conducted statistical analysis, interpretation of results and editing of the manuscript. DR and LG assisted with data collection and interpretation of the results: AR is the guarantor.

Competing interests: All authors declare that the answer to the questions on your competing interests form are all no and therefore have nothing to declare. All authors have completed the Unified Competing Interest form at [www.icmje.org/coi\\_disclosure.pdf](http://www.icmje.org/coi_disclosure.pdf) (available on request from the corresponding author) and declare that (1) they have no relationships with any companies that might have an interest in the submitted work in the previous 3 years: (2) their spouses, partners, or children have no financial relationships that may be relevant to the submitted work: and (3) have no specified or non-financial interests that may be relevant to the submitted work.

Ethical approval. King's College Hospital Research Ethics Committee (06/Q0703/131).

## Acknowledgements

We thank Charlotte Ellerton, Sheetal Gohil, Catherine Fleuret, Jessica Zubek, Sharon Wheelock, Joanna Lam, Abigail Wilson and Lucy Diamond for participant recruitment and the medical and nursing staff who completed the enteral and parenteral feeding charts.

Copyright. The Corresponding Author has the right to grant on behalf of all authors and does grant on behalf of all authors, an exclusive licence (or non exclusive for government employees) on a worldwide basis to the BMJ Publishing Group Ltd and its licensees, to permit this article (if accepted) to be published in BMJ editions and any other BMJPG products and to exploit all subsidiary rights, as set out in our licence.

1  
2  
3  
4  
5  
6  
7  
8  
9  
10  
11  
12  
13  
14  
15  
16  
17  
18  
19  
20  
21  
22  
23  
24  
25  
26  
27  
28  
29  
30  
31  
32  
33  
34  
35  
36  
37  
38  
39  
40  
41  
42  
43  
44  
45  
46  
47  
48  
49  
50  
51  
52  
53  
54  
55  
56  
57  
58  
59  
60

For peer review only

Flow chart 1. Flow chart showing number of participants at each stage of the study and stratification.

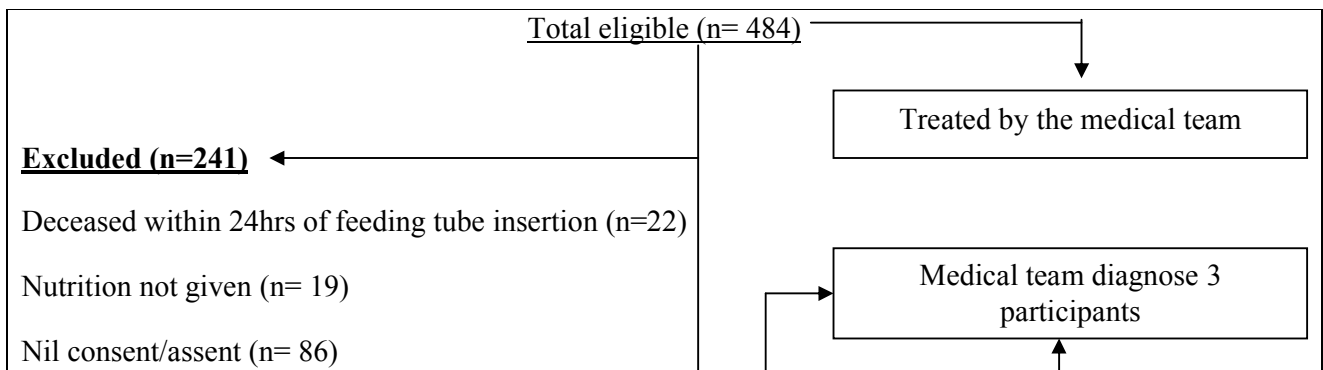

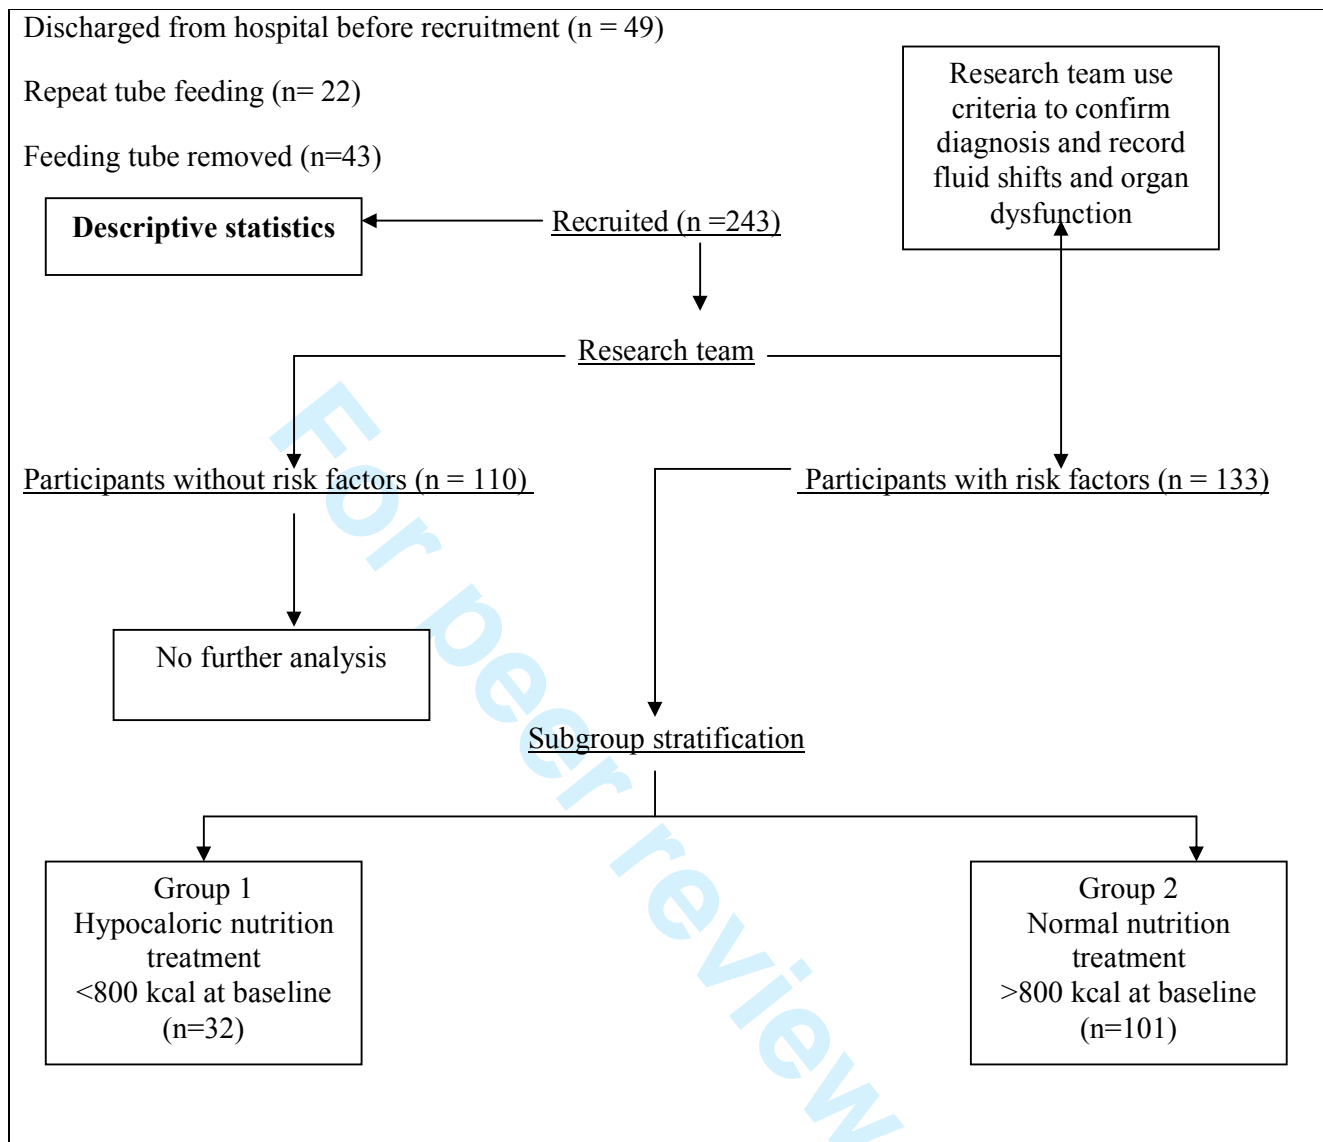

Table 1. Cohort information, diagnostic data, supplementation totals and energy intake. (n= 243)

| Factor                       | Location      |             |             |
|------------------------------|---------------|-------------|-------------|
|                              | Ward (n= 153) | HDU (n= 46) | ICU (n= 44) |
| Male                         | 78            | 25          | 27          |
| Female                       | 75            | 21          | 17          |
| <b>Age</b>                   |               |             |             |
| Median                       | 62.0          | 53.0        | 52.5        |
| IQR                          | 47.0 – 73.0   | 39.0 – 67.5 | 41.0 – 61.7 |
| <b>Diagnostic categories</b> |               |             |             |
| Neurological                 | 39            | 20          | 16          |
| Respiratory                  | 6             | 5           | 2           |
| Trauma                       | 6             | 0           | 0           |
| Medicine                     | 9             | 0           | 0           |
| Hepatology                   | 25            | 2           | 10          |

|                                                |                           |                           |                            |
|------------------------------------------------|---------------------------|---------------------------|----------------------------|
| Renal                                          | 8                         | 1                         | 0                          |
| Pancrease                                      | 9                         | 0                         | 1                          |
| Gastroenterology                               | 6                         | 3                         | 4                          |
| Cancer                                         | 13                        | 2                         | 0                          |
| Cardiovascular                                 | 22                        | 9                         | 4                          |
| Surgical                                       | 7                         | 1                         | 5                          |
| Sepsis                                         | 3                         | 3                         | 2                          |
| <b>Length of stay (days)</b>                   |                           |                           |                            |
| Median                                         | 28.5                      | 38.0                      | 29.5                       |
| IQR                                            | 17.0 – 47.5               | 17.0 – 67.5               | 20.5 – 42.7                |
| <b>Electrolyte supplementation</b>             |                           |                           |                            |
| totals                                         |                           |                           |                            |
| Potassium                                      | 72                        | 29                        | 37                         |
| Phosphate                                      | 48                        | 24                        | 21                         |
| Magnesium                                      | 46                        | 28                        | 35                         |
| <b>B vitamin supplementation</b>               |                           |                           |                            |
| totals                                         | 43                        | 10                        | 8                          |
| <b>Duration of artificial nutrition (days)</b> |                           |                           |                            |
| Median                                         | 10.5                      | 15.0                      | 15.0                       |
| IQR                                            | 5.0 – 15.0                | 9.5 – 15.0                | 12.3 – 15.0                |
| <b>Energy intake kcal/day</b>                  |                           |                           |                            |
| <b>Baseline</b>                                |                           |                           |                            |
| Median (IQR)                                   | <b>675 (390 – 1300)</b>   | <b>690 (480 – 1000)</b>   | <b>760 (420 - 1124)</b>    |
| <b>Day 3</b>                                   |                           |                           |                            |
| Median (IQR)                                   | <b>1113 (848 – 1600)</b>  | <b>1440 (1120 – 1606)</b> | <b>1470 (10005 – 1809)</b> |
| <b>Day 6</b>                                   |                           |                           |                            |
| Median (IQR)                                   | <b>1547 (1094 – 1850)</b> | <b>1500 (1292 – 1826)</b> | <b>1370 (965 – 1750)</b>   |
| <b>Day 9</b>                                   |                           |                           |                            |
| Median (IQR)                                   | <b>1500 (900 – 1877)</b>  | <b>1449 (960 – 1700)</b>  | <b>1590 (1200 – 1907)</b>  |

IQR = inter quartile range at 25<sup>th</sup> and 75<sup>th</sup> centiles.

Table 2. Moderately and severely low serum electrolyte values with mortality (total participants = 243).

| <b>Number of electrolyte values recorded</b> | <b>Number of moderately low values</b> | <b>Mortality</b> | <b>Number of severely low values</b> | <b>Mortality</b> |
|----------------------------------------------|----------------------------------------|------------------|--------------------------------------|------------------|
| <b>Potassium</b>                             | <3.4 mmol/L                            |                  | <2.5 mmol/L                          |                  |
| Baseline (n 243)                             | 20                                     | 0                | 1                                    | 0                |
| Day 3 (n 226)                                | 22                                     | 0                | 3                                    | 0                |
| Day 6 (n 180)                                | 11                                     | 0                | 0                                    | 0                |
| Day 9 (n 152)                                | 7                                      | 1                | 1                                    | 0                |
| <b>Phosphate</b>                             | <0.5 mmol/L                            |                  | <0.32 mmol/L                         |                  |
| Baseline (n 243)                             | 7                                      | 1                | 3                                    | 0                |
| Day 3 (n 222)                                | 15                                     | 3                | 1                                    | 0                |
| Day 6 (n 177)                                | 4                                      | 0                | 0                                    | 0                |

|                  |             |   |             |   |
|------------------|-------------|---|-------------|---|
| Day 9 (n 151)    | 2           | 0 | 0           | 0 |
| <b>Magnesium</b> | <0.6 mmol/L |   | <0.5 mmol/L |   |
| Baseline (n 243) | 14          | 0 | 5           | 0 |
| Day 3 (n 164)    | 5           | 0 | 2           | 0 |
| Day 6 (n 132)    | 4           | 0 | 2           | 0 |
| Day 9 (n 112)    | 5           | 0 | 3           | 0 |

Normal hospital reference ranges potassium 3.5 – 5.0 mmol/L, phosphate 0.8 – 1.4 mmol/L and magnesium 0.7 – 1.00 mmol/L.

Table 3. Malnutrition profiles of the two groups. Figures are totals within each group.

| <b>Risk factors</b>                              | <b>Group 1</b><br>Hypocaloric nutrition<br><800 kcal/day at<br>baseline<br>(n= 32) | <b>Group 2</b><br>Normal nutrition<br>>800 kcal at<br>baseline<br>(n= 101) | <b>Totals</b> |
|--------------------------------------------------|------------------------------------------------------------------------------------|----------------------------------------------------------------------------|---------------|
| BMI < (16kg/m <sup>2</sup> )                     | 6                                                                                  | 4                                                                          | 10            |
| BMI < (14kg/m <sup>2</sup> )                     | 1                                                                                  | 1                                                                          | 2             |
| Wt loss > 15%<br>within the previous 3-6 months  | 16                                                                                 | 9                                                                          | 25            |
| Poor nutritional<br>intake > 10 days             | 20                                                                                 | 15                                                                         | 35            |
| Low baseline serum electrolyte<br>concentrations |                                                                                    |                                                                            |               |
| Potassium <3.5 mmol/L                            | 14                                                                                 | 6                                                                          | 20            |
| Phosphate <0.8 mmol/L                            | 20                                                                                 | 14                                                                         | 34            |
| Magnesium <0.7 mmol/L                            | 11                                                                                 | 10                                                                         | 21            |

Table 4. Characteristics of the three participants confirmed with refeeding syndrome.

|                  | Participant<br>x | Participant<br>y | Participant<br>z |
|------------------|------------------|------------------|------------------|
| Age years        | 48               | 23               | 31               |
| Diagnostic group | trauma           | gastroenterology | hepatology       |

|                                       |            |              |            |
|---------------------------------------|------------|--------------|------------|
| Chronic condition                     | alcoholism | malnutrition | alcoholism |
| Route of artificial nutrition support | enteral    | enteral      | enteral    |
| Baseline received energy kcal/day     | 800        | 294          | 325        |
| Baseline energy kcal/kg               | 12.7       | 6.3          | 8.1        |
| <b>Potassium replacement</b>          | <b>Yes</b> | <b>Yes</b>   | <b>Yes</b> |
| <b>Phosphate replacement</b>          | <b>Yes</b> | <b>Yes</b>   | <b>Yes</b> |
| <b>Magnesium replacement</b>          | <b>No</b>  | <b>No</b>    | <b>Yes</b> |
| Body weight/kg                        | 63         | 47           | 40         |
| BMI (kg/m <sup>2</sup> )              | 20         | 16           | 16         |
| Intravenous carbohydrate              | yes        | yes          | yes        |
| Survival outcome                      | survived   | survived     | survived   |

**Table 5. Number of participants in the two risk groups that received electrolyte supplementation.**

|                 | <b>Group 1</b><br>Hypocaloric nutrition<br><800 kcal/day at baseline<br>(n=32) | <b>Group 2</b><br>Normal nutrition >800 kcal at<br>baseline<br>(n=101) |
|-----------------|--------------------------------------------------------------------------------|------------------------------------------------------------------------|
| <b>Baseline</b> |                                                                                |                                                                        |
| Potassium       | 28                                                                             | 22                                                                     |
| Phosphate       | 21                                                                             | 19                                                                     |
| Magnesium       | 20                                                                             | 20                                                                     |
| <b>Day 3</b>    |                                                                                |                                                                        |
| Potassium       | 8                                                                              | 34                                                                     |
| Phosphate       | 6                                                                              | 30                                                                     |
| Magnesium       | 5                                                                              | 32                                                                     |
| <b>Day 6</b>    |                                                                                |                                                                        |
| Potassium       | 8                                                                              | 34                                                                     |
| Phosphate       | 5                                                                              | 30                                                                     |
| Magnesium       | 7                                                                              | 32                                                                     |
| <b>Day 9</b>    |                                                                                |                                                                        |
| Potassium       | 4                                                                              | 27                                                                     |
| Phosphate       | 5                                                                              | 22                                                                     |
| Magnesium       | 3                                                                              | 21                                                                     |

Box 1. Criteria for the determination of refeeding syndrome risk.<sup>3</sup>

| <b>One of the following:</b>                                                                                                                 | <b>Two of the following:</b>                                                                                                     |
|----------------------------------------------------------------------------------------------------------------------------------------------|----------------------------------------------------------------------------------------------------------------------------------|
| <ul style="list-style-type: none"> <li>BMI &lt; 16 (kg/m<sup>2</sup>)</li> <li>Unintentional weight loss &gt;15% in the preceding</li> </ul> | <ul style="list-style-type: none"> <li>BMI &lt; 18.5 (kg/m<sup>2</sup>)</li> <li>Unintentional weight loss &gt;10% in</li> </ul> |

|                                                                                                                                                                                                                         |                                                                                                                                                                                                   |
|-------------------------------------------------------------------------------------------------------------------------------------------------------------------------------------------------------------------------|---------------------------------------------------------------------------------------------------------------------------------------------------------------------------------------------------|
| <p>three – six months</p> <ul style="list-style-type: none"> <li>• Very little or no nutritional intake for more than 10 days</li> <li>• Low levels of serum potassium, phosphate or magnesium prior to feed</li> </ul> | <p>the preceding three – six months</p> <ul style="list-style-type: none"> <li>• Very little or no nutritional intake for more than 5 days</li> <li>• History of alcohol or drug abuse</li> </ul> |
|-------------------------------------------------------------------------------------------------------------------------------------------------------------------------------------------------------------------------|---------------------------------------------------------------------------------------------------------------------------------------------------------------------------------------------------|

Box 2. Criteria for confirmation of refeeding syndrome from the commencement of artificial nutrition support.

|                                                                                                                                                                                                                                                                                                            |                                                                                                                                   |
|------------------------------------------------------------------------------------------------------------------------------------------------------------------------------------------------------------------------------------------------------------------------------------------------------------|-----------------------------------------------------------------------------------------------------------------------------------|
| <p>1. Electrolytes.</p> <ul style="list-style-type: none"> <li>• Potassium</li> <li>• Phosphate</li> <li>• Magnesium</li> </ul> <p>2. Peripheral oedema or acute circulatory fluid overload.</p> <p>3. Disturbance to organ function including respiratory failure, cardiac failure, pulmonary oedema.</p> | <p>Severely low electrolyte concentrations<sup>4</sup></p> <p>&lt; 2.5 mmol/L*</p> <p>&lt; 0.32 mmol/L</p> <p>&lt; 0.5 mmol/L</p> |
|------------------------------------------------------------------------------------------------------------------------------------------------------------------------------------------------------------------------------------------------------------------------------------------------------------|-----------------------------------------------------------------------------------------------------------------------------------|

\*King's College Hospital severely low serum potassium concentration value requiring replacement.

**Data sharing statement** No additional data is available.

## References

1. Solomon SM, Kirby DF. The refeeding syndrome: A review. *JPEN* 1990;14(1): 90-7.



- 1  
2 2. Schnitker MA, Mattman PE, Bliss TL. A clinical study of malnutrition in Japanese prisoners of war.  
3  
4 *Ann Intern Med* 1951;35:69-96.  
5  
6
- 7  
8 3. National Institute for Health and Clinical Excellence. Nutrition support in adults. CG32, London,  
9  
10 England.
- 11  
12  
13 4. Crook MA, Hally V, Panteli JV. The importance of the refeeding syndrome. *Nutrition* 2001; 17:632-7.  
14  
15
- 16  
17 5. Weinsier RL, Krumdieck CL. Death resulting from overzealous total parenteral nutrition: The refeeding  
18  
19 syndrome revisited. *Am J Clin Nutr* 1981; 34: 393-9.  
20  
21
- 22  
23 6. Zeki S, Culkin A, Gabe SM, Nightingale JM. Refeeding hypophosphataemia is more common in enteral  
24  
25 than parenteral feeding in adult patients. *Clin Nutr* 2011;365-68.  
26  
27
- 28  
29 7. Kaganski M, Levy S, Koren-Morag N, Berger D, Knobler H. Hypophosphataemia in the elderly is  
30  
31 associated with the refeeding syndrome and reduced survival. *J Intern Med* 2005;257-61.  
32  
33
- 34  
35 8. Flesher ME, Archer KA, Leslie BD, McCollom RA, Martinka GP. Assessing the metabolic and clinical  
36  
37 consequences of early enteral feeding in the malnourished patient. *JPEN* 2005;29:108-17.  
38  
39
- 40  
41 9. Schofield WN, Schofield C, James WPT. Basal Metabolic Rate. Human Nutrition: *Clinical Nutrition*  
42  
43 1985; 39: 1-96.  
44  
45
- 46 **10. Crawley, H. Food portion sizes, 1988: HMSO, London, England.**  
47  
48
- 49  
50 **11. Compeat, Nutrition Systems, Oxon, England.**  
51  
52  
53
- 54  
55 12. King AL, Sica DA, Miller G, Pierpaoli S. Severe hypophosphataemia in a general hospital population.  
56  
57 *South Med J* 1987;80:831-5.  
58  
59  
60

- 1  
2  
3  
4  
5  
6  
7  
8  
9  
10  
11  
12  
13  
14  
15  
16  
17  
18  
19  
20  
21  
22  
23  
24  
25  
26  
27  
28  
29  
30  
31  
32  
33  
34  
35  
36  
37  
38  
39  
40  
41  
42  
43  
44  
45  
46  
47  
48  
49  
50  
51  
52  
53  
54  
55  
56  
57  
58  
59  
60
13. Hoffman M, Zemlin AE, Meyer WP, Erasmus RT. Hypophosphataemia at a large academic hospital in south Africa. *J Clin Pathol* 2008;61:1104-7.
14. Betro MG, Pain RW. Hypophosphataemia and hyperphosphataemia in a hospital population. *BMJ* 1972;1:273-6.
15. Guillou PJ, Morgan DB, Hill GL. Hypophosphataemia: a complication of innocuous glucose saline. *The Lancet* 1976;308:710-12.
16. Patel U, Sriram K. Acute respiratory failure due to refeeding syndrome and hypophosphataemia induced by hypocaloric enteral nutrition. *Nutrition* 2009;25:364-7.
17. Brown EL, Gwynne Jenkins BA. A case of respiratory failure complicated by acute hypophosphataemia. *Anaesthesia* 1980;35:42-5.
18. Heymsfield SB, Bethel RA, Ansley JD, Gibbs DM, Felner JM, Nutter DO. Cardiac abnormalities in cachectic patients before and during nutritional repletion. *Am Heart J* 1978;95:584-94.
19. Faintuch J, Soriano, FG, Ladeira JP, Janiszewski M, Velasco IT, Gama-Rodrigues JJ. Refeeding procedures after 43 days of total fasting. *Nutrition* 2001;17:100-4.
20. Korbonitis M, Blaine D, Elia M, Powell-Tuck J. Metabolic and hormonal changes during the refeeding period of prolonged fasting. *Eur J Endocrinol* 2007;157:157-66.
21. Whitelaw M, Gilbertson H, Lam PY, Sawyer SM. Does aggressive refeeding in hospitalized adolescents with anorexia nervosa result in increased hypophosphataemia? *J Adolescent Health* 2010;46:577-82.
22. Cumming AD, Farquhar JR, Bouchier A. Refeeding hypophosphataemia in anorexia nevosa and alcoholism. *BMJ* 1987;295:490-1.

1  
2  
3  
4 23. Terlevich A, Hearing SD, Woltersdorf WW, Smyth C, Reid D, McCullagh E, et al. Refeeding  
5 syndrome: effective and safe treatment with Phosphates Polyfusor. *Aliment Pharm Therap* 2003;7:1325-9.  
6  
7  
8

9  
10  
11 24. Mehanna HM, Moledina J, Travis J. Refeeding syndrome: what it is and how to prevent and treat it.  
12 *BMJ* 2008; 336: 1495-8.  
13  
14  
15  
16  
17  
18  
19  
20  
21  
22  
23  
24  
25  
26  
27  
28  
29  
30  
31  
32  
33  
34  
35  
36  
37  
38  
39  
40  
41  
42  
43  
44  
45  
46  
47  
48  
49  
50  
51  
52  
53  
54  
55  
56  
57  
58  
59  
60

For peer review only

1  
2  
3 **Manuscript ID bmjopen-2012-002173**

4 Title. Occurrence of refeeding syndrome in adults commenced on **artificial nutrition support:**  
5  
6 prospective cohort study.  
7  
8  
9

10  
11  
12  
13 Alan Rio, Kevin Whelan, Louise Goff, Dianne Reidlinger, Nigel Smeeton.  
14

15  
16 Alan Rio, Nutrition and Dietetic Department, King's College Hospital, Denmark Hill, London, SE5 9RS,  
17  
18 UK. Kevin Whelan, King's College London, School of Medicine, Diabetes and Nutritional Sciences  
19  
20 Division, London, SE1 9NH, UK. Louise Goff, King's College London, School of Medicine, Diabetes and  
21  
22 Nutritional Sciences Division, London, SE1 9NH, UK. Dianne Reidlinger, King's College London,  
23  
24 School of Medicine, Diabetes and Nutritional Sciences Division, London, SE1 9NH, UK, Nigel Smeeton,  
25  
26 King's College London, Division of Imaging Sciences & Biomedical Engineering, London, SE1 7EH, UK.  
27  
28  
29  
30  
31  
32  
33

34 Correspondence to: A Rio, Alan.Rio.1@city.ac.uk  
35  
36  
37  
38  
39  
40  
41  
42  
43  
44  
45  
46  
47  
48  
49  
50  
51  
52  
53  
54  
55  
56  
57  
58  
59  
60

## Article Summary

### Article focus

Hypothesis: The risk factors for the refeeding syndrome are weak and cause unnecessary delay of nutrition.

Research question: Which risk factors reliably predict development of the refeeding syndrome?

### Key messages

- Refeeding syndrome is a complex constellation of major characteristics which requires a multi-facet diagnostic criteria.
- Refeeding syndrome is a rare, survivable phenomena that can occur despite identification of risk and hypocaloric nutritional treatment.
- Intravenous glucose infusion prior to **artificial nutrition support** can precipitate the refeeding syndrome.
- Starvation is the most reliable predictor for onset of the syndrome.

### Strengths and limitations of this study

The authors were not involved in the nutritional treatment, electrolyte supplementation or diagnosis of the refeeding syndrome. The diagnostic criteria provided unequivocal confirmation of the refeeding syndrome and omitted borderline results. The main source of data loss was the excluded group which may potentially have contained participants who went on to develop the refeeding syndrome.

## Abstract

**Background** Refeeding syndrome is a potentially life threatening condition characterised by severe intracellular electrolyte shifts, acute circulatory fluid overload and organ failure. The initial symptoms are non specific but early clinical features are severely low serum electrolyte concentrations of potassium, phosphate or magnesium. Risk factors for the syndrome include starvation, chronic alcoholism, anorexia nervosa and surgical interventions that require lengthy periods of fasting. The causes of the refeeding syndrome are excess or unbalanced enteral, parenteral or oral nutritional intake. Prevention of the syndrome includes identification of individuals at risk, controlled hypocaloric nutritional intake and supplementary electrolyte replacement.

**Objective** To determine the occurrence of refeeding syndrome in adults commenced on artificial nutrition support.

**Design** Prospective cohort study.

**Setting** Large, single site university teaching hospital. Recruitment period 2007-2009.

**Participants** 243 adults commenced on artificial nutrition support for the first time during that admission recruited from wards and intensive care.

**Main outcome measures** Primary outcome: Occurrence of the refeeding syndrome. Secondary outcome: Analysis of the risk factors which predict the refeeding syndrome. Tertiary outcome: Mortality due to refeeding syndrome and all cause mortality.

**Results** 133 participants had one or more of the following risk factors: BMI < 16 - 18.5  $\geq$  (kg/m<sup>2</sup>), unintentional weight loss >15% in the preceding three – six months, very little or no nutritional intake >10 days, history of alcohol or drug abuse and low baseline levels of serum potassium, phosphate or magnesium prior to recruitment. Poor nutritional intake for more than 10 days, weight loss >15% prior to recruitment and low serum magnesium level at baseline predicted the refeeding syndrome with a sensitivity of 66.7%: specificity was >80% apart from weight loss of >15% which was 59.1%. Baseline low serum magnesium was an independent predictor of the

1  
2 refeeding syndrome (p=0.021). Three participants (2% 3/243) developed severe electrolyte shifts,  
3  
4 acute circulatory fluid overload and disturbance to organ function following artificial nutrition  
5  
6 support and were diagnosed with refeeding syndrome. There were no deaths attributable to the  
7  
8 refeeding syndrome but (5.3% 13/243) participants died during the feeding period and (28%  
9  
10 68/243) died during the hospital admission. Death of these participants was due to cerebrovascular  
11  
12 accident, traumatic injury, respiratory failure, organ failure or end of life causes.  
13  
14

15  
16 **Conclusion** Refeeding syndrome was a rare, survivable phenomenon that occurred during  
17  
18 hypocaloric nutrition support in participants identified at risk. Independent predictors for  
19  
20 refeeding syndrome were starvation and baseline low serum magnesium concentration. Intravenous  
21  
22 carbohydrate infusion prior to artificial nutrition support may have precipitated the onset of the  
23  
24 syndrome.  
25  
26

## 27 28 29 **Introduction**

30  
31 Refeeding syndrome has been defined as severe fluid and electrolyte shifts in malnourished patients  
32  
33 during oral, enteral or parenteral refeeding.<sup>1</sup> A **key risk factor** for the syndrome is starvation with **early**  
34  
35 published reports being prisoners of war.<sup>2</sup> In recent times refeeding syndrome has been confirmed in  
36  
37 hunger strikers, individuals with anorexic nervosa and chronic alcoholics. **The modern definition of**  
38  
39 **refeeding syndrome is life threatening severely low serum electrolyte concentrations, fluid and**  
40  
41 **electrolyte imbalance and disturbance of organ function resulting from over rapid or unbalanced**  
42  
43 **nutrition support.**<sup>3</sup> However, this definition is imprecise and lacks definitive electrolyte threshold values  
44  
45 to confidently diagnose the refeeding syndrome.  
46  
47  
48

49  
50  
51 The metabolic shift from starvation to feeding increases cellular uptake of glucose, potassium, phosphate  
52  
53 and magnesium which lowers the serum concentration of these electrolytes.<sup>4</sup> The early signs of the  
54  
55 refeeding syndrome are non specific but include severely low serum electrolyte concentrations of serum  
56  
57 phosphate, potassium and magnesium which if untreated can progress to acute circulatory fluid overload,  
58  
59  
60

1  
2 respiratory compromise and cardiac failure.<sup>5</sup> Severe hypophosphataemia has been described as the  
3  
4 hallmark of refeeding syndrome.  
5  
6

7  
8  
9 Guidelines for the prevention and treatment of refeeding syndrome advise identification of individuals at  
10 risk, controlled hypocaloric nutritional treatment and supplementary electrolytes.<sup>3</sup> However, not all  
11 individuals with risk factors for refeeding syndrome develop symptoms during nutritional repletion.<sup>6</sup> A  
12 potential consequence of adherence to these untested guidelines is the delay of adequate nutrition to  
13 undernourished individuals. We conducted a prospective cohort study to determine the occurrence of  
14 refeeding syndrome in adults commenced on **artificial nutrition support**. Refeeding syndrome was  
15 confirmed using a three facet diagnostic criteria of defined severely low serum electrolyte concentrations,  
16 acute circulatory fluid overload and organ dysfunction.  
17  
18  
19  
20  
21  
22  
23  
24  
25

## 26 **Methods**

### 27 **Study design**

28  
29 This was a prospective cohort study conducted at a large, single site university teaching hospital. Criteria  
30 to determine risk of refeeding syndrome is displayed in Box 1. The risk factors were Body Mass Index  
31 (BMI) < 16 (kg/m<sup>2</sup>), unintentional weight loss >15% in the preceding three – six months, very little or no  
32 nutritional intake for more than 10 days and low levels of serum potassium, phosphate or magnesium prior  
33 to **artificial nutrition support**. The three facet diagnostic criteria used by the research team to confirm  
34 refeeding syndrome is displayed in Box 2. **Each participant's medical team diagnosed refeeding**  
35 **syndrome using serum electrolyte shifts and observed clinical complications of acute circulatory**  
36 **fluid overload and organ dysfunction. The medical teams documented this information in the**  
37 **participant's medical record as daily clinical observations and treatment. The research team used**  
38 **the participant's medical record to confirm that symptoms occurred from the onset of artificial**  
39 **nutrition support recording observations daily and serum electrolyte concentrations every third day**  
40 **from baseline. For each participant diagnosed with refeeding syndrome the research team**  
41 **compared the serum electrolyte concentrations, the acute circulatory fluid overload and organ**  
42  
43  
44  
45  
46  
47  
48  
49  
50  
51  
52  
53  
54  
55  
56  
57  
58  
59  
60



1  
2 **dysfunction against the three facet diagnostic criteria. All three facets of the diagnostic criteria were**  
3  
4 **required by the research team to unequivocally confirm the diagnosis of refeeding syndrome. To**  
5  
6 avoid any potential bias the authors were not involved in nutritional treatment, electrolyte supplementation  
7  
8 or the initial diagnosis of refeeding syndrome during the study period. The schematic for participant  
9  
10 exclusion, recruitment and analysis is displayed in Flow chart 1.

### 13 **Sample size**

14  
15 The sample size was estimated from the reported prevalence of refeeding syndrome, defined as  
16  
17 hypophosphataemia  $<0.4$  mmol/L, to be 1 - 10%.<sup>7-8</sup> A cohort of 240 would produce between 2 - 24  
18  
19 potential participants meeting the diagnostic criteria.

### 22 **Participants**

23  
24 **Participants commenced on enteral or parenteral artificial nutrition support were eligible to be**  
25  
26 **recruited if they met the inclusion criteria. The inclusion criteria was: adults  $>18$  years of age**  
27  
28 **commenced on artificial nutrition support for the first time during that hospital admission.**

29  
30 **Exclusion criteria were: previous artificial nutrition support during the hospital admission,**  
31  
32 **artificial nutrition support commenced at the previous institution, participants  $<18$  years of age or**  
33  
34 **failure to obtain consent/assent due to serious illness or lack of next of kin.** Informed consent was  
35  
36 obtained from participants or next of kin prior to enrolment. Study participation was for the duration of  
37  
38 artificial nutrition support to a maximum of 15 consecutive days. All participants were recruited within 48  
39  
40 hours of the commencement of artificial nutrition support with enteral or parenteral feeding. **Energy**  
41  
42 **prescriptions for each participant were estimated by the dietetic speciality who used basal metabolic**  
43  
44 **rate and stress related factors.**<sup>9</sup> The hospital nutrition policy for adults with risk factors for refeeding  
45  
46 syndrome was 800 kcal day or 50% of estimated adult energy requirements.  
47  
48  
49  
50

### 51 **Outcome measures**

52  
53 The primary outcome of interest in this study was the occurrence of refeeding syndrome. The secondary  
54  
55 outcome was analysis of the risk factor at predicting refeeding syndrome. The tertiary outcome measure  
56  
57 was mortality due to refeeding syndrome and all cause mortality.  
58  
59  
60

## Data Collection

Baseline serum electrolyte concentrations were recorded within 24 hours of study enrolment then every third day for a maximum of 15 days during the period of artificial nutrition support. Serum electrolytes were not recorded when artificial nutrition support was stopped. Serum electrolyte concentrations were obtained from the hospital electronic in-patient system (iSoft, v1.0 Oxon, England). The normal hospital adult serum reference ranges were potassium 3.5 – 5.0 mmol/L, phosphate 0.8 – 1.4 mmol/L and magnesium 0.7 – 1.00 mmol/L. Body weight (kg) was measured using balance and digital scales accurate to within 0.1kg (Seca, 22089 Hamburg, Germany) wearing light indoor clothing. Body weight was not recorded in participants who were sedated or unconscious. Height (m) was recorded using measured or recalled data as appropriate. Body mass index ( $\text{kg}/\text{m}^2$ ) and percentage weight loss ( $\text{normal body weight} - \text{current body weight}/\text{normal body weight} \times 100$ ) were calculated. To determine which participants had poor nutritional intake prior to artificial nutrition support, dietary caloric intake was calculated by a research assistant. **Each participant was asked to recall their dietary food and fluid intake in the 10 days preceding recruitment into the study. Food portion sizes were estimated from a reference guide<sup>10</sup> and total daily energy intake was calculated using a nutritional analysis software package, (Compeat, Oxon, England)<sup>11</sup>** Participants unable to provide a diet history the next of kin was interviewed, failing this retrospective food intake records were used.

## Data Analysis

**Descriptive statistics were performed on the entire cohort of 243 participants to obtain diagnostic data, electrolyte supplementation and caloric intake. Each participant was classified at risk or not at risk of refeeding syndrome as per the diagnostic criteria displayed in Box 2. Sensitivity and specificity values for refeeding syndrome were calculated for the entire cohort of 243 participants.** The precision of the sensitivity and specificity analysis was set at 70%. Predictor variables were transformed to binary categories representing whether or not refeeding syndrome had been **diagnosed**. The refeeding syndrome outcomes were analysed using Fisher's exact test at the  $p < 0.05$  level. **A subgroup analysis of the 133 participants with risk factors for refeeding syndrome was performed**

1  
2 **to provide data on the secondary outcome measure of the study. This subgroup analysis stratified**  
3 **these 133 participants according to their baseline energy intake as: Group 1 <800 kcal day versus**  
4 **Group 2 >800 kcal day, Flow chart 1. This stratification of baseline energy intake allowed**  
5 **hypocaloric versus normal caloric intake to be analysed. There was no further analysis of the 110**  
6 **participants without risk factors who did not develop symptoms of the syndrome. All data analysis**  
7 **was performed using SPSS version 17 (Chicago, IL, US).**  
8  
9  
10  
11  
12  
13  
14

## 15 **Results**

16  
17 Four hundred and eighty four participants were eligible to be recruited, displayed in Flow chart 1. A total  
18 of 243 participants were recruited median age 57.0 years (interquartile range 44.0 – 69.0), sex 130  
19 (53.5%) men. There were 133 participants with risk factors for refeeding syndrome of which 68 were men.  
20 Recruitment locations were wards 153 (63.0%), high dependency unit 46 (18.9%) and intensive care 44  
21 (18.1%), see Table 1. In total 212 (87.2%) participants received enteral, 23 (9.5%) participants parenteral  
22 and 8 (3.3%) received enteral/parenteral tube feeding. There were 2615 total feed days, median duration  
23 13 days (interquartile range 6-15). A total of 2765 serum electrolyte results were recorded, 1014 for  
24 potassium, 1006 for phosphate and 745 for magnesium. The total number of participants who received  
25 electrolyte supplementation were potassium 71, magnesium 52 and phosphate. Occurrence of moderate  
26 and severely low serum electrolyte concentration with mortality is displayed in Table 2. Mortality was not  
27 attributed to refeeding syndrome either during feeding (5.3%, 13/243) or hospital admission (28%  
28 68/243). Cause of death in these participants was due to underlying disease with mortality by location:  
29 ward 45/153, high dependency unit 14/46 and intensive care 9/44.  
30  
31  
32  
33  
34  
35  
36  
37  
38  
39  
40  
41  
42  
43  
44  
45  
46  
47  
48

49 Using the criteria in Box 2 the research team confirmed the diagnosis of refeeding syndrome in three  
50 participants, asymptomatic electrolyte depletion in two participants and the remaining 238 participants did  
51 not develop symptoms. Poor nutritional intake for more than 10 days, weight loss >15% prior to  
52 recruitment and a low serum magnesium level at baseline had sensitivity values of 66.7%. By contrast, all  
53 specificity values were high (>80%) apart from weight loss >15%, which had a specificity of 59.1%. Low  
54  
55  
56  
57  
58  
59  
60

1  
2 baseline serum magnesium ( $p=0.021$ ) independently predicted refeeding syndrome: other independent  
3 variables were not significantly associated. The pre-existing risk factors for refeeding syndrome within  
4 groups one and two are displayed in Table 3. Characteristics of the three participants diagnosed with  
5 refeeding syndrome are displayed in Table 4. **Number of participants in the two risk groups that**  
6  
7  
8  
9  
10  
11 **received electrolyte supplementation is displayed in Table 5.**  
12

### 13 14 15 **Participant diagnosed with refeeding syndrome** 16

17 Participant X, a 48 year female who presented with confusion, bilateral leg weakness, alcohol withdrawal,  
18 poor nutritional intake with repeat vomiting for seven days, C2 fracture, translocation at C2/3 and high  
19 urinary ketones. The participant received two **intravenous doses of a standard vitamins B and C**  
20 **formulation** in 0.9% sodium chloride followed by 100 mg oral thiamine. Day two the patient received  
21 one litre of intravenous potassium chloride and two litres of 5% glucose followed by enteral tube feeding.  
22 Day three serum phosphate was recorded at 0.33 mol/L and **50 mmol/L intravenous phosphate in 500ml**  
23 **was infused over 12 hours**. At day four the participant developed peripheral oedema with tachycardia  
24 and was transferred to the intensive care unit due to respiratory failure and acute circulatory fluid  
25  
26  
27  
28  
29  
30  
31  
32  
33  
34  
35  
36  
37  
38  
39  
40  
41  
42  
43  
44  
45  
46  
47  
48  
49  
50  
51  
52  
53  
54  
55  
56  
57  
58  
59  
60  
overload.

Participant Y, a 23 year old female, with Crohn's disease and subtotal bowel colectomy presented with  
frontal occipital headaches radiating to neck with history of nausea, vomiting and weight loss of 26kg. At  
day 117 of admission a nasogastric tube was inserted due to poor nutritional intake. Nutrition was stopped  
within two hours due to vomiting and abdominal pain. The participant collapsed 24 hours later due to  
hypotension, hypothermia, dehydration and pseudo-bowel obstruction. The participant was transferred to  
the high dependency unit for fluid resuscitation. Intravenous 10% glucose was commenced and a 16Fr  
wide bore nasogastric tube was inserted for gastric drainage. Day two serum electrolytes levels were  
potassium 3.2 mmol/L, phosphate 0.26 mmol/L, magnesium 0.55 mmol/L. **Intravenous phosphate**

1  
2 **replacement was commenced with 50 mmol/L phosphate in 500ml.** The participant was transferred to  
3  
4 the intensive care unit, intubated and commenced on haemofiltration due to multi-organ failure.  
5  
6

7  
8 Participant Z, a 31 year old female, with decompensated liver cirrhosis secondary to alcohol, with existing  
9 chronic pancreatitis and opiate dependency with a weekly alcohol intake of 56 units was admitted to the  
10 hepatology unit with abdominal pain, vomiting and dehydration. Usual body weight was 48kg, admission  
11 dry weight was 40kg. **The participant received a standard formulation of vitamins B and C** followed  
12 by one litre of 5% glucose containing 20mmol/L potassium chloride. Oral thiamine 100 mg and oral  
13 vitamin B compound were prescribed. The participant had a nasogastric tube inserted for **artificial**  
14 **nutrition support.** At day three serum electrolytes were potassium 2.5 mmol/L, phosphate 0.37 mmol/L,  
15 magnesium 0.56 mmol/L. The participant developed acute circulatory fluid overload, symptoms of  
16 tachycardia and pneumonia. The participant was **given 50 mmol/L intravenous phosphate in 500ml**  
17 **infused over 12 hours in one litre of 5% glucose, 25mmol magnesium and a repeat intravenous dose**  
18 **of a standard vitamin B and C formulation.**  
19  
20  
21  
22  
23  
24  
25  
26  
27  
28  
29  
30  
31  
32

### 33 Discussion

34  
35 **This study applied a three facet diagnostic criteria to confirm the occurrence of refeeding syndrome**  
36 **in adults commenced on artificial nutrition support. This unequivocal clinical diagnostic criteria**  
37 **comprised: defined severe serum electrolyte concentrations, acute circulatory fluid overload and**  
38 **organ dysfunction. These symptoms occurred within 72 hours of hypocaloric artificial nutrition**  
39 **support in three participants identified at risk.** Two participants developed respiratory failure and  
40 multi-organ failure and required admission to the intensive care unit whilst the third participant, who  
41 developed acute circulatory fluid overload and tachycardia, was treated on the ward. The survival of these  
42 three participants represents advances in the medical management of severely malnourished individuals  
43 compared to the fatal outcomes of early reports.<sup>2,5</sup> This study does not support previous reports that  
44 refeeding syndrome can be prevented by identification of risk and treatment with hypocaloric feeding. In  
45 this study refeeding syndrome occurred in three participants who had been identified at risk and treated  
46  
47  
48  
49  
50  
51  
52  
53  
54  
55  
56  
57  
58  
59  
60

1  
2 with hypocaloric feeding. Risk factors distinct to the three refeeding syndrome participants were a history  
3 of starvation and baseline low serum magnesium concentration. Two of the three participants received an  
4 **intravenous dose of standard vitamins B and C formulation prior to artificial nutrition support**  
5 which may have prevented Wernicke's encephalopathy. The small number of participants diagnosed with  
6 refeeding syndrome in this study may have been due to the medical teams having a policy of early  
7 electrolyte replacement. However, we suspect that the most compelling reason for the low occurrence of  
8 refeeding syndrome in this study was that starvation was a characteristic of only three participants. The  
9 analysis of the two subgroups showed strikingly similar malnutrition profiles but substantially different  
10 energy intakes. We interpret this to suggest that for refeeding syndrome to occur a risk factor was  
11 required. The compelling risk factor of the three diagnosed participants was starvation. This interpretation  
12 is supported by the analysis of those participants who reported a short period of fasting prior to artificial  
13 nutrition support and experienced moderate falls in their serum electrolyte concentrations.  
14  
15  
16  
17  
18  
19  
20  
21  
22  
23  
24  
25  
26  
27  
28  
29  
30

### 31 **Strengths and weaknesses of the study**

32  
33 The results of this study should be interpreted with caution. The study was not designed to assess the  
34 mechanism of refeeding syndrome. **The strengths of the study were the standardised diagnostic**  
35 **criteria, the risk factor analysis and comparison of the hypocaloric and normal caloric nutrition**  
36 **groups. The results have a limited external validity due to the inherent bias of the narrow selection**  
37 **criteria. This selection bias effect and exclusion of participants who were able to take oral**  
38 **nutritional intake may explain the low occurrence of refeeding syndrome recorded in the study**  
39 **population. A large number of potentially eligible participants could not be recruited due to**  
40 **difficulty obtaining consent. A further reduction in potential participants was death within 24 hours**  
41 **of commencing artificial nutrition support. The cause of death in these participants was due to their**  
42 **underlying medical condition of cerebrovascular accident, traumatic injury, respiratory failure due**  
43 **to degenerative neurological disease, organ failure or end of life causes. Since death occurred within**  
44 **24 hours of starting artificial nutrition support we cannot exclude complications of refeeding**  
45  
46  
47  
48  
49  
50  
51  
52  
53  
54  
55  
56  
57  
58  
59  
60

1  
2 **syndrome as a contributing factor. Confusion, communication impairment and cognitive problems**  
3  
4 **due to refeeding syndrome may also explain why a large number of severely ill individuals refused**  
5  
6 **participation in this cohort study. Equally valid is the possibility that these severely ill individuals**  
7  
8 **refused participation due to the limited benefit inclusion in this study would provide.**

9  
10 The diagnosis of only three participants limited the statistical analyses that we could perform which  
11  
12 excluded regression analyses. The low occurrence of refeeding syndrome may have been due to the  
13  
14 medical teams taking preventative actions such as early electrolyte replacement. The severely low  
15  
16 electrolyte concentrations may be interpreted as too low to confirm the syndrome. However, the serum  
17  
18 electrolyte concentrations were obtained from a review of the evidence to enable an unequivocal diagnosis  
19  
20 of refeeding syndrome. This discreet approach was taken to avoid falsely diagnosing participants with  
21  
22 single, abnormal electrolyte concentrations. Whilst the review of evidence was consistent for severely low  
23  
24 serum electrolyte concentrations the authors identified a lack of consensus on the electrolyte concentration  
25  
26 values to diagnose the syndrome. To avoid bias the authors were not involved in nutritional treatment,  
27  
28 electrolyte supplementation or the initial diagnosis of the syndrome.  
29  
30  
31  
32  
33  
34  
35

### 36 **Interpretation**

37  
38 Occurrence of serum phosphate <0.5 mmol/L in this study was 3% at day one and 6% at day three which  
39  
40 was higher than that reported in the adult hospital population of 0.2% to 2%.<sup>7,8, 12, 13</sup> The higher occurrence  
41  
42 of hypophosphataemia in this study may have been due to the cohort containing participants recruited  
43  
44 from the high dependency and intensive care units. Very few participants developed severe electrolyte  
45  
46 shifts although moderate serum concentrations of potassium, phosphate and magnesium occurred. The  
47  
48 interpretation of the moderate electrolyte shifts, without symptoms of the syndrome, was cellular uptake  
49  
50 of electrolytes in response to nutritional input. The subgroup analysis identified many participants with  
51  
52 risk factors for the syndrome. Hypocaloric nutritional treatment may have prevented refeeding syndrome  
53  
54 in some of these participants. However, the subgroup analysis revealed **that** one group received more  
55  
56  
57  
58  
59  
60

1  
2 energy sooner and for longer but did not develop symptoms. **Applying the diagnostic criteria in Box 2**  
3  
4 **revealed the risk factors<sup>3</sup> to be weak predictors of the syndrome.**

5  
6 **The impact of intravenous glucose infusion, without adequate and repeated electrolyte replacement**  
7  
8 **in the three diagnosed participants, cannot be under estimated.** In starved individuals gluconeogenesis  
9 is the predominant metabolic pathway for energy production. **Infusion of intravenous glucose**  
10 **potentially suppressed gluconeogenesis which caused a switch to glycolysis in these three**  
11 **participants. This switch caused insulin to be released causing rapid cellular uptake of serum**  
12 **phosphate, potassium and magnesium electrolytes. We propose that the initial infusion of glucose in**  
13 **the three starved participants potentially triggered the metabolic sequence that resulted in the**  
14 **development of the syndrome.** Hypocaloric feeding failed to prevent refeeding syndrome in these three  
15 participants for one important reason, it continued the input of simple carbohydrates causing more insulin  
16 to be released. This explanation is supported by other studies where intravenous glucose infusion was  
17 attributed to hypophosphataemia of  $<0.7$  mmol/L<sup>14</sup> which progressed to respiratory failure at serum  
18 phosphate concentration 0.2 mmol/L - 0.36 mmol/L.<sup>15-17</sup> **The results of the present study indicate that**  
19 **glucose infusion should be avoided in starved individuals who require fluid and nutritional**  
20 **treatment. The finding that intravenous glucose infusion in starved individuals may initiate the**  
21 **refeeding syndrome requires further research. A potential hypothesis to be tested is that electrolyte**  
22 **replacement strategies are more effective at preventing the syndrome than caloric restriction.**  
23  
24  
25  
26  
27  
28  
29  
30  
31  
32  
33  
34  
35  
36  
37  
38  
39  
40  
41

#### 42 **Comparison with other studies**

43  
44 The era of hypercaloric feeding in cachectic individuals was associated with cardiac abnormalities,<sup>18</sup>  
45 respiratory failure and death.<sup>5</sup> Two decades later controlled hypocaloric nutritional treatment and  
46 electrolyte supplementation prevented refeeding syndrome in eight prisoners who had been on hunger  
47 strike for 43 days.<sup>19</sup> Under controlled conditions hypocaloric nutritional treatment and intravenous  
48 phosphate containing 25 mmol/L over 12 hours with effervescent oral phosphate (16mmol) twice daily  
49 prevented serious complications associated with refeeding syndrome in a 30 year old male who endured  
50 44 days of self imposed starvation.<sup>20</sup> Refeeding syndrome was prevented in 29 anorexic nervosa  
51  
52  
53  
54  
55  
56  
57  
58  
59  
60



1  
2 participants given 500 to 2,000 mg phosphate daily.<sup>21</sup> The energy prescription was 1,900 kcal at day one  
3 and 2,200 kcal at day three yet moderate hypophosphataemia (0.31 - 0.8 mmol/L) did not occur. These  
4 varied studies reflect the increased awareness of the syndrome where serious complications and mortality  
5 can be avoided.<sup>22-23</sup> In the present study refeeding syndrome was a rare, survivable phenomenon that  
6 occurred in starved individuals who crucially were identified at risk and treated with hypocaloric  
7 nutrition.<sup>24</sup> **However, intravenous glucose infusion prior to artificial nutrition support may have**  
8 **triggered the onset of the refeeding syndrome.**

### 17 **Other information**

18 Funding: none declared.

19 Contributors: AR was responsible for the conception, design, initiation and overall co-ordination of the  
20 study: AR drafted the paper, is responsible for its intellectual content, interpretation and analysis of the  
21 results. KW was involved in the design of the study, interpretation of results and writing the manuscript.  
22 NS conducted statistical analysis, interpretation of results and editing of the manuscript. DR and LG  
23 assisted with data collection and interpretation of the results: AR is the guarantor.

24 Competing interests: All authors declare that the answer to the questions on your competing interests form  
25 are all no and therefore have nothing to declare. All authors have completed the Unified Competing  
26 Interest form at [www.icmje.org/coi\\_disclosure.pdf](http://www.icmje.org/coi_disclosure.pdf) (available on request from the corresponding author)  
27 and declare that (1) they have no relationships with any companies that might have an interest in the  
28 submitted work in the previous 3 years: (2) their spouses, partners, or children have no financial  
29 relationships that may be relevant to the submitted work: and (3) have no specified or non-financial  
30 interests that may be relevant to the submitted work.

31 Ethical approval. King's College Hospital Research Ethics Committee (06/Q0703/131).

### 32 **Acknowledgements**

33 We thank Charlotte Ellerton, Sheetal Gohil, Catherine Fleuret, Jessica Zubek, Sharon Wheelock, Joanna  
34 Lam, Abigail Wilson and Lucy Diamond for participant recruitment and the medical and nursing staff  
35 who completed the enteral and parenteral feeding charts.

1  
2 Copyright. The Corresponding Author has the right to grant on behalf of all authors and does grant on  
3  
4 behalf of all authors, an exclusive licence (or non exclusive for government employees) on a worldwide  
5  
6 basis to the BMJ Publishing Group Ltd and its licensees, to permit this article (if accepted) to be published  
7  
8 in BMJ editions and any other BMJPG products and to exploit all subsidiary rights, as set out in our  
9  
10 licence.  
11  
12  
13  
14  
15  
16  
17  
18  
19  
20  
21  
22  
23  
24  
25  
26  
27  
28  
29  
30  
31  
32  
33  
34  
35  
36  
37  
38  
39  
40  
41  
42  
43  
44  
45  
46  
47  
48  
49  
50  
51  
52  
53  
54  
55  
56  
57  
58  
59  
60

For peer review only

Flow chart 1. Flow chart showing number of participants at each stage of the study and stratification.

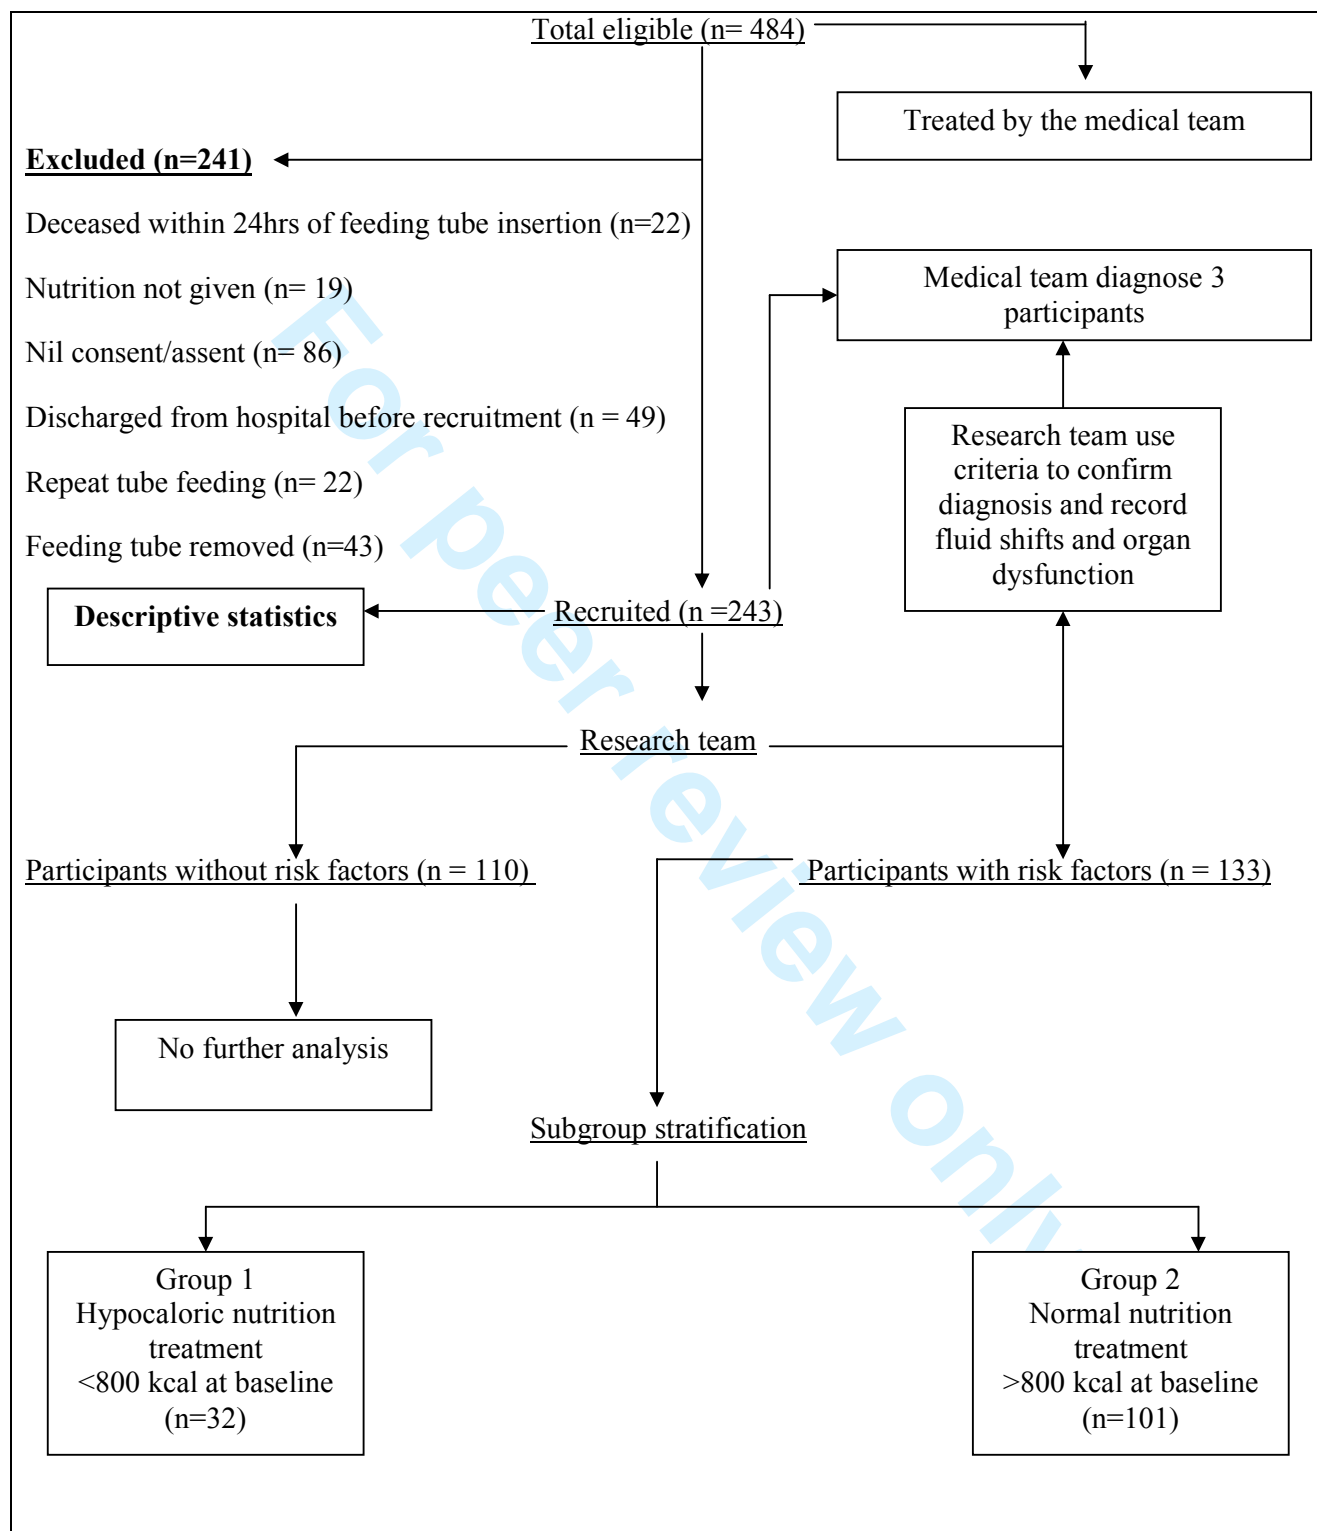

Table 1. Cohort information, diagnostic data, supplementation totals and energy intake. (n= 243)

| Factor                                         | Location                  |                           |                            |
|------------------------------------------------|---------------------------|---------------------------|----------------------------|
|                                                | Ward (n= 153)             | HDU (n= 46)               | ICU (n= 44)                |
| Male                                           | 78                        | 25                        | 27                         |
| Female                                         | 75                        | 21                        | 17                         |
| <b>Age</b>                                     |                           |                           |                            |
| Median                                         | 62.0                      | 53.0                      | 52.5                       |
| IQR                                            | 47.0 – 73.0               | 39.0 – 67.5               | 41.0 – 61.7                |
| <b>Diagnostic categories</b>                   |                           |                           |                            |
| Neurological                                   | 39                        | 20                        | 16                         |
| Respiratory                                    | 6                         | 5                         | 2                          |
| Trauma                                         | 6                         | 0                         | 0                          |
| Medicine                                       | 9                         | 0                         | 0                          |
| Hepatology                                     | 25                        | 2                         | 10                         |
| Renal                                          | 8                         | 1                         | 0                          |
| Pancrease                                      | 9                         | 0                         | 1                          |
| Gastroenterology                               | 6                         | 3                         | 4                          |
| Cancer                                         | 13                        | 2                         | 0                          |
| Cardiovascular                                 | 22                        | 9                         | 4                          |
| Surgical                                       | 7                         | 1                         | 5                          |
| Sepsis                                         | 3                         | 3                         | 2                          |
| <b>Length of stay (days)</b>                   |                           |                           |                            |
| Median                                         | 28.5                      | 38.0                      | 29.5                       |
| IQR                                            | 17.0 – 47.5               | 17.0 – 67.5               | 20.5 – 42.7                |
| <b>Electrolyte supplementation totals</b>      |                           |                           |                            |
| Potassium                                      | 72                        | 29                        | 37                         |
| Phosphate                                      | 48                        | 24                        | 21                         |
| Magnesium                                      | 46                        | 28                        | 35                         |
| <b>B vitamin supplementation totals</b>        | 43                        | 10                        | 8                          |
| <b>Duration of artificial nutrition (days)</b> |                           |                           |                            |
| Median                                         | 10.5                      | 15.0                      | 15.0                       |
| IQR                                            | 5.0 – 15.0                | 9.5 – 15.0                | 12.3 – 15.0                |
| <b>Energy intake kcal/day</b>                  |                           |                           |                            |
| <b>Baseline</b>                                |                           |                           |                            |
| Median (IQR)                                   | <b>675 (390 – 1300)</b>   | <b>690 (480 – 1000)</b>   | <b>760 (420 - 1124)</b>    |
| <b>Day 3</b>                                   |                           |                           |                            |
| Median (IQR)                                   | <b>1113 (848 – 1600)</b>  | <b>1440 (1120 – 1606)</b> | <b>1470 (10005 – 1809)</b> |
| <b>Day 6</b>                                   |                           |                           |                            |
| Median (IQR)                                   | <b>1547 (1094 – 1850)</b> | <b>1500 (1292 – 1826)</b> | <b>1370 (965 – 1750)</b>   |
| <b>Day 9</b>                                   |                           |                           |                            |
| Median (IQR)                                   | <b>1500 (900 – 1877)</b>  | <b>1449 (960 – 1700)</b>  | <b>1590 (1200 – 1907)</b>  |

IQR = inter quartile range at 25<sup>th</sup> and 75<sup>th</sup> centiles.

Table 2. Moderately and severely low serum electrolyte values with mortality (total participants = 243).

| Number of electrolyte values recorded | Number of moderately low values | Mortality | Number of severely low values | Mortality |
|---------------------------------------|---------------------------------|-----------|-------------------------------|-----------|
| <b>Potassium</b>                      | <3.4 mmol/L                     |           | <2.5 mmol/L                   |           |
| Baseline (n 243)                      | 20                              | 0         | 1                             | 0         |
| Day 3 (n 226)                         | 22                              | 0         | 3                             | 0         |
| Day 6 (n 180)                         | 11                              | 0         | 0                             | 0         |
| Day 9 (n 152)                         | 7                               | 1         | 1                             | 0         |
| <b>Phosphate</b>                      | <0.5 mmol/L                     |           | <0.32 mmol/L                  |           |
| Baseline (n 243)                      | 7                               | 1         | 3                             | 0         |
| Day 3 (n 222)                         | 15                              | 3         | 1                             | 0         |
| Day 6 (n 177)                         | 4                               | 0         | 0                             | 0         |
| Day 9 (n 151)                         | 2                               | 0         | 0                             | 0         |
| <b>Magnesium</b>                      | <0.6 mmol/L                     |           | <0.5 mmol/L                   |           |
| Baseline (n 243)                      | 14                              | 0         | 5                             | 0         |
| Day 3 (n 164)                         | 5                               | 0         | 2                             | 0         |
| Day 6 (n 132)                         | 4                               | 0         | 2                             | 0         |
| Day 9 (n 112)                         | 5                               | 0         | 3                             | 0         |

Normal hospital reference ranges potassium 3.5 – 5.0 mmol/L, phosphate 0.8 – 1.4 mmol/L and magnesium 0.7 – 1.00 mmol/L.

Table 3. Malnutrition profiles of the two groups. Figures are totals within each group.

| Risk factors                                     | Group 1<br>Hypocaloric nutrition<br><800 kcal/day at<br>baseline<br>(n= 32) | Group 2<br>Normal nutrition<br>>800 kcal at<br>baseline<br>(n= 101) | Totals |
|--------------------------------------------------|-----------------------------------------------------------------------------|---------------------------------------------------------------------|--------|
| BMI < (16kg/m <sup>2</sup> )                     | 6                                                                           | 4                                                                   | 10     |
| BMI < (14kg/m <sup>2</sup> )                     | 1                                                                           | 1                                                                   | 2      |
| Wt loss > 15%<br>within the previous 3-6 months  | 16                                                                          | 9                                                                   | 25     |
| Poor nutritional<br>intake > 10 days             | 20                                                                          | 15                                                                  | 35     |
| Low baseline serum electrolyte<br>concentrations |                                                                             |                                                                     |        |
| Potassium <3.5 mmol/L                            | 14                                                                          | 6                                                                   | 20     |
| Phosphate <0.8 mmol/L                            | 20                                                                          | 14                                                                  | 34     |
| Magnesium <0.7 mmol/L                            | 11                                                                          | 10                                                                  | 21     |

Table 4. Characteristics of the three participants confirmed with refeeding syndrome.

|                                       | Participant<br>x | Participant<br>y | Participant<br>z |
|---------------------------------------|------------------|------------------|------------------|
| Age years                             | 48               | 23               | 31               |
| Diagnostic group                      | trauma           | gastroenterology | hepatology       |
| Chronic condition                     | alcoholism       | malnutrition     | alcoholism       |
| Route of artificial nutrition support | enteral          | enteral          | enteral          |
| Baseline received energy kcal/day     | 800              | 294              | 325              |
| Baseline energy kcal/kg               | 12.7             | 6.3              | 8.1              |
| <b>Potassium replacement</b>          | <b>Yes</b>       | <b>Yes</b>       | <b>Yes</b>       |
| <b>Phosphate replacement</b>          | <b>Yes</b>       | <b>Yes</b>       | <b>Yes</b>       |
| <b>Magnesium replacement</b>          | <b>No</b>        | <b>No</b>        | <b>Yes</b>       |
| Body weight/kg                        | 63               | 47               | 40               |
| BMI (kg/m <sup>2</sup> )              | 20               | 16               | 16               |
| Intravenous carbohydrate              | yes              | yes              | yes              |
| Survival outcome                      | survived         | survived         | survived         |

Table 5. Number of participants in the two risk groups that received electrolyte supplementation.

|                 | <b>Group 1</b><br>Hypocaloric nutrition<br><800 kcal/day at baseline<br>(n=32) | <b>Group 2</b><br>Normal nutrition >800 kcal at<br>baseline<br>(n=101) |
|-----------------|--------------------------------------------------------------------------------|------------------------------------------------------------------------|
| <b>Baseline</b> |                                                                                |                                                                        |
| Potassium       | 28                                                                             | 22                                                                     |
| Phosphate       | 21                                                                             | 19                                                                     |
| Magnesium       | 20                                                                             | 20                                                                     |
| <b>Day 3</b>    |                                                                                |                                                                        |
| Potassium       | 8                                                                              | 34                                                                     |
| Phosphate       | 6                                                                              | 30                                                                     |
| Magnesium       | 5                                                                              | 32                                                                     |
| <b>Day 6</b>    |                                                                                |                                                                        |
| Potassium       | 8                                                                              | 34                                                                     |
| Phosphate       | 5                                                                              | 30                                                                     |
| Magnesium       | 7                                                                              | 32                                                                     |
| <b>Day 9</b>    |                                                                                |                                                                        |
| Potassium       | 4                                                                              | 27                                                                     |
| Phosphate       | 5                                                                              | 22                                                                     |
| Magnesium       | 3                                                                              | 21                                                                     |

Box 1. Criteria for the determination of refeeding syndrome risk.<sup>3</sup>

| One of the following:                                                                                                                                                                                                                                                                                                    | Two of the following:                                                                                                                                                                                                                                                                  |
|--------------------------------------------------------------------------------------------------------------------------------------------------------------------------------------------------------------------------------------------------------------------------------------------------------------------------|----------------------------------------------------------------------------------------------------------------------------------------------------------------------------------------------------------------------------------------------------------------------------------------|
| <ul style="list-style-type: none"> <li>• BMI &lt; 16 (kg/m<sup>2</sup>)</li> <li>• Unintentional weight loss &gt;15% in the preceding three – six months</li> <li>• Very little or no nutritional intake for more than 10 days</li> <li>• Low levels of serum potassium, phosphate or magnesium prior to feed</li> </ul> | <ul style="list-style-type: none"> <li>• BMI &lt; 18.5 (kg/m<sup>2</sup>)</li> <li>• Unintentional weight loss &gt;10% in the preceding three – six months</li> <li>• Very little or no nutritional intake for more than 5 days</li> <li>• History of alcohol or drug abuse</li> </ul> |

Box 2. Criteria for confirmation of refeeding syndrome from the commencement of artificial nutrition support.

|                                                                                                                                                                                                                                                                                                            |                                                                                                                                                                                                                       |
|------------------------------------------------------------------------------------------------------------------------------------------------------------------------------------------------------------------------------------------------------------------------------------------------------------|-----------------------------------------------------------------------------------------------------------------------------------------------------------------------------------------------------------------------|
| <p>1. Electrolytes.</p> <ul style="list-style-type: none"> <li>• Potassium</li> <li>• Phosphate</li> <li>• Magnesium</li> </ul> <p>2. Peripheral oedema or acute circulatory fluid overload.</p> <p>3. Disturbance to organ function including respiratory failure, cardiac failure, pulmonary oedema.</p> | <p>Severely low electrolyte concentrations<sup>4</sup></p> <p style="padding-left: 40px;">&lt; 2.5 mmol/L*</p> <p style="padding-left: 40px;">&lt; 0.32 mmol/L</p> <p style="padding-left: 40px;">&lt; 0.5 mmol/L</p> |
|------------------------------------------------------------------------------------------------------------------------------------------------------------------------------------------------------------------------------------------------------------------------------------------------------------|-----------------------------------------------------------------------------------------------------------------------------------------------------------------------------------------------------------------------|

\*King's College Hospital severely low serum potassium concentration value requiring replacement.

**Data sharing statement** No additional data is available.

## References

1. Solomon SM, Kirby DF. The refeeding syndrome: A review. *JPEN* 1990;14(1): 90-7.
2. Schnitker MA, Mattman PE, Bliss TL. A clinical study of malnutrition in Japanese prisoners of war. *Ann Intern Med* 1951;35:69-96.
3. National Institute for Health and Clinical Excellence. Nutrition support in adults. CG32, London, England.
4. Crook MA, Hally V, Panteli JV. The importance of the refeeding syndrome. *Nutrition* 2001; 17:632-7.
5. Weinsier RL, Krumdieck CL. Death resulting from overzealous total parenteral nutrition: The refeeding syndrome revisited. *Am J Clin Nutr* 1981; 34: 393-9.
6. Zeki S, Culkin A, Gabe SM, Nightingale JM. Refeeding hypophosphataemia is more common in enteral than parenteral feeding in adult patients. *Clin Nutr* 2011;365-68.
7. Kaganski M, Levy S, Koren-Morag N, Berger D, Knobler H. Hypophosphataemia in the elderly is associated with the refeeding syndrome and reduced survival. *J Intern Med* 2005;257-61.
8. Flesher ME, Archer KA, Leslie BD, McCollom RA, Martinka GP. Assessing the metabolic and clinical consequences of early enteral feeding in the malnourished patient. *JPEN* 2005;29:108-17.
9. Schofield WN, Schofield C, James WPT. Basal Metabolic Rate. Human Nutrition: *Clinical Nutrition* 1985; 39: 1-96.
- 10. Crawley, H. Food portion sizes, 1988: HMSO, London, England.**
- 11. Compeat, Nutrition Systems, Oxon, England.**



- 1  
2 12. King AL, Sica DA, Miller G, Pierpaoli S. Severe hypophosphataemia in a general hospital population.  
3  
4 *South Med J* 1987;80:831-5.  
5  
6  
7  
8  
9 13. Hoffman M, Zemlin AE, Meyer WP, Erasmus RT. Hypophosphataemia at a large academic hospital in  
10 south Africa. *J Clin Pathol* 2008;61:1104-7.  
11  
12  
13  
14  
15 14. Betro MG, Pain RW. Hypophosphataemia and hyperphosphataemia in a hospital population. *BMJ*  
16 1972;1:273-6.  
17  
18  
19  
20  
21 15. Guillou PJ, Morgan DB, Hill GL. Hypophosphataemia: a complication of innocuous glucose saline.  
22 *The Lancet* 1976;308:710-12.  
23  
24  
25  
26  
27 16. Patel U, Sriram K. Acute respiratory failure due to refeeding syndrome and hypophosphataemia  
28 induced by hypocaloric enteral nutrition. *Nutrition* 2009;25:364-7.  
29  
30  
31  
32 17. Brown EL, Gwynne Jenkins BA. A case of respiratory failure complicated by acute  
33 hypophosphataemia. *Anaesthesia* 1980;35:42-5.  
34  
35  
36  
37  
38 18. Heymsfield SB, Bethel RA, Ansley JD, Gibbs DM, Felner JM, Nutter DO. Cardiac abnormalities in  
39 cachectic patients before and during nutritional repletion. *Am Heart J* 1978;95:584-94.  
40  
41  
42  
43 19. Faintuch J, Soriano, FG, Ladeira JP, Janiszewski M, Velasco IT, Gama-Rodrigues JJ. Refeeding  
44 procedures after 43 days of total fasting. *Nutrition* 2001;17:100-4.  
45  
46  
47  
48  
49 20. Korbonitis M, Blaine D, Elia M, Powell-Tuck J. Metabolic and hormonal changes during the refeeding  
50 period of prolonged fasting. *Eur J Endocrinol* 2007;157:157-66.  
51  
52  
53  
54 21. Whitelaw M, Gilbertson H, Lam PY, Sawyer SM. Does aggressive refeeding in hospitalized  
55 adolescents with anorexia nervosa result in increased hypophosphataemia? *J Adolescent Health*  
56 2010;46:577-82.  
57  
58  
59  
60

1  
2 22. Cumming AD, Farquhar JR, Bouchier A. Refeeding hypophosphataemia in anorexia nervosa and  
3 alcoholism. *BMJ* 1987;295:490-1.  
4  
5

6  
7  
8  
9 23. Terlevich A, Hearing SD, Woltersdorf WW, Smyth C, Reid D, McCullagh E, et al. Refeeding  
10 syndrome: effective and safe treatment with Phosphates Polyfusor. *Aliment Pharm Therap* 2003;7:1325-9.  
11  
12

13  
14  
15 24. Mehanna HM, Moledina J, Travis J. Refeeding syndrome: what it is and how to prevent and treat it.  
16 *BMJ* 2008; 336: 1495-8.  
17  
18  
19  
20  
21  
22  
23  
24  
25  
26  
27  
28  
29  
30  
31  
32  
33  
34  
35  
36  
37  
38  
39  
40  
41  
42  
43  
44  
45  
46  
47  
48  
49  
50  
51  
52  
53  
54  
55  
56  
57  
58  
59  
60

STROBE checklist.

| Title and abstract   | Item No | Recommendation                                                                                                                                                                                                                                                                                                                                                                                                                                                                                                                                                                                                                                                                                                                                                                                                                                                                                                                                                                                                                                                                                                                                                                                                                                                                                                                                                                                                                                                                                                                                                                                                                                                                                                                                                                                                                                                                                                                                                                                                                                                                                                                                                                                                                                                                                                                                                                                                                                                                                                                                                                                                                                                                                                                                    |
|----------------------|---------|---------------------------------------------------------------------------------------------------------------------------------------------------------------------------------------------------------------------------------------------------------------------------------------------------------------------------------------------------------------------------------------------------------------------------------------------------------------------------------------------------------------------------------------------------------------------------------------------------------------------------------------------------------------------------------------------------------------------------------------------------------------------------------------------------------------------------------------------------------------------------------------------------------------------------------------------------------------------------------------------------------------------------------------------------------------------------------------------------------------------------------------------------------------------------------------------------------------------------------------------------------------------------------------------------------------------------------------------------------------------------------------------------------------------------------------------------------------------------------------------------------------------------------------------------------------------------------------------------------------------------------------------------------------------------------------------------------------------------------------------------------------------------------------------------------------------------------------------------------------------------------------------------------------------------------------------------------------------------------------------------------------------------------------------------------------------------------------------------------------------------------------------------------------------------------------------------------------------------------------------------------------------------------------------------------------------------------------------------------------------------------------------------------------------------------------------------------------------------------------------------------------------------------------------------------------------------------------------------------------------------------------------------------------------------------------------------------------------------------------------------|
|                      | 1       | Occurrence of the refeeding syndrome in adults commenced on artificial nutrition support: prospective cohort study.                                                                                                                                                                                                                                                                                                                                                                                                                                                                                                                                                                                                                                                                                                                                                                                                                                                                                                                                                                                                                                                                                                                                                                                                                                                                                                                                                                                                                                                                                                                                                                                                                                                                                                                                                                                                                                                                                                                                                                                                                                                                                                                                                                                                                                                                                                                                                                                                                                                                                                                                                                                                                               |
|                      |         | <p><b>Background</b> Refeeding syndrome is the metabolic response to excess nutrition in starved individuals characterised by severe intracellular electrolyte shifts, acute circulatory fluid overload and organ failure. It can occur during enteral, parenteral or oral feeding.</p> <p><b>Objective</b> To determine the occurrence of refeeding syndrome in adults commenced on artificial nutrition support.</p> <p><b>Design</b> Prospective cohort study.</p> <p><b>Setting</b> Large, single site university teaching hospital. Recruitment period 2007-2009.</p> <p><b>Participants</b> 243 adults commenced on artificial nutrition support for the first time during that admission recruited from wards and intensive care.</p> <p><b>Main outcome measures</b> Primary outcome: Occurrence of the refeeding syndrome. Secondary outcome: Sensitivity and specificity of the risk factors for predicting refeeding syndrome. Tertiary outcome: Mortality due to refeeding syndrome and all cause mortality.</p> <p><b>Results</b> 133 participants had one or more of the following risk factors; BMI &lt; 16 - 18.5 <math>\geq</math> (kg/m<sup>2</sup>), unintentional weight loss &gt;15% in the preceding three – six months, very little or no nutritional intake &gt;10 days, history of alcohol or drug abuse and low baseline levels of serum potassium, phosphate or magnesium prior to recruitment. Poor nutritional intake for more than 10 days, weight loss &gt;15% prior to recruitment and low serum magnesium level at baseline predicted the refeeding syndrome with a sensitivity of 66.7%; specificity was &gt;80% apart from weight loss of &gt;15% which was 59.1%. Baseline low serum magnesium was the only independent predictor of the refeeding syndrome (p=0.021). Three participants (2% 3/243) developed severe electrolyte shifts, acute circulatory fluid overload and disturbance to organ function following tube feeding and were diagnosed with refeeding syndrome. There were no deaths attributable to the refeeding syndrome but (5.3% 13/243) participants died during the feeding period and (28% 68/243) died during the hospital admission. Death of these participants was due to cerebrovascular accident, traumatic injury, respiratory failure or terminal end of life conditions.</p> <p><b>Conclusion</b> Refeeding syndrome was a rare, survivable phenomenon that occurred during hypocaloric nutrition support in participants identified at risk. Predictors for refeeding syndrome were starvation and baseline low serum magnesium concentration. Intravenous carbohydrate infusion prior to artificial nutrition support may have precipitated the onset of the syndrome.</p> |
| <b>Introduction</b>  |         |                                                                                                                                                                                                                                                                                                                                                                                                                                                                                                                                                                                                                                                                                                                                                                                                                                                                                                                                                                                                                                                                                                                                                                                                                                                                                                                                                                                                                                                                                                                                                                                                                                                                                                                                                                                                                                                                                                                                                                                                                                                                                                                                                                                                                                                                                                                                                                                                                                                                                                                                                                                                                                                                                                                                                   |
| Background/rationale | 2       | Refeeding syndrome is the metabolic response to excess carbohydrate or nutrition in starved individuals characterised by severe intracellular electrolyte shifts, acute circulatory fluid overload and organ failure. It                                                                                                                                                                                                                                                                                                                                                                                                                                                                                                                                                                                                                                                                                                                                                                                                                                                                                                                                                                                                                                                                                                                                                                                                                                                                                                                                                                                                                                                                                                                                                                                                                                                                                                                                                                                                                                                                                                                                                                                                                                                                                                                                                                                                                                                                                                                                                                                                                                                                                                                          |

|                              |   |                                                                                                                                                                                                                                                                                                                                                                                                                                                                                                                                                                                                                                                                                                                                                                                                                                                                                                                                            |
|------------------------------|---|--------------------------------------------------------------------------------------------------------------------------------------------------------------------------------------------------------------------------------------------------------------------------------------------------------------------------------------------------------------------------------------------------------------------------------------------------------------------------------------------------------------------------------------------------------------------------------------------------------------------------------------------------------------------------------------------------------------------------------------------------------------------------------------------------------------------------------------------------------------------------------------------------------------------------------------------|
|                              |   | can occur during enteral, parenteral or oral feeding. However, a precise diagnostic criteria is lacking. The accuracy of risk factors for predicting refeeding syndrome are unknown.                                                                                                                                                                                                                                                                                                                                                                                                                                                                                                                                                                                                                                                                                                                                                       |
| Objectives                   | 3 | Primary outcome: Occurrence of the refeeding syndrome.<br>Secondary outcome: Sensitivity and specificity of the risk factors for predicting refeeding syndrome. Tertiary outcome: Mortality due to refeeding syndrome.                                                                                                                                                                                                                                                                                                                                                                                                                                                                                                                                                                                                                                                                                                                     |
| <b>Methods</b>               |   |                                                                                                                                                                                                                                                                                                                                                                                                                                                                                                                                                                                                                                                                                                                                                                                                                                                                                                                                            |
| Study design                 | 4 | Prospective cohort study which recruited adults referred for artificial nutrition support. Recruitment was within 48 hours of commencing artificial nutrition support. Serum electrolyte concentration levels were recorded at baseline then every third day for the duration of study participation at day 15. A three facet diagnostic criteria was used to confirm positive cases of refeeding syndrome. Symptoms of the refeeding syndrome were severely low electrolyte concentrations, acute circulatory fluid overload and organ dysfunction. These symptoms had to have occurred after the commencement of artificial nutrition support for the diagnosis of refeeding syndrome to be made.                                                                                                                                                                                                                                        |
| Setting                      | 5 | Ethical approval was 2006. Recruitment period 2007-2009, location was a large, single site university teaching hospital. Participants were recruited from all wards, intensive care and high dependency unit. Wards predominantly were surgical, medical, elderly, stroke and neurological. Data analysis was 2009-2011.                                                                                                                                                                                                                                                                                                                                                                                                                                                                                                                                                                                                                   |
| Participants                 | 6 | Eligibility criteria; adults >18 years of age commenced on artificial nutrition support for the first time during that hospital admission. All participants were recruited within 48 hours of the commencement of artificial nutrition support. Study participation was for the duration of artificial nutrition support to a maximum of 15 consecutive days. Informed consent was obtained from participants or next of kin prior to recruitment. Participants were followed up from baseline, then every third day up to day 15 of study participation.                                                                                                                                                                                                                                                                                                                                                                                  |
| Variables                    | 7 | Diagnostic criteria to confirm refeeding syndrome taken from reference number three in the references section. .<br>1. Serum electrolyte concentrations falls as follows from the start of artificial nutrition support; potassium < 2.5 mmol/L, phosphate < 0.32 mmol/L and magnesium < 0.5 mmol/L.<br>2. Peripheral oedema or acute circulatory fluid overload.<br>3. Disturbance to organ function including respiratory failure, cardiac failure, pulmonary oedema.<br>Risk Factors. BMI < 16 (kg/m <sup>2</sup> ), Unintentional weight loss >15% in the preceding three – six months, very little or no nutritional intake for more than 10 days, low levels of serum potassium, phosphate or magnesium prior to feed. Also these, BMI < 18.5 (kg/m <sup>2</sup> ), unintentional weight loss >10% in the preceding three – six months, very little or no nutritional intake for more than 5 days, history of alcohol or drug abuse. |
| Data sources/<br>measurement | 8 | For each variable of interest, give sources of data and details of methods of assessment (measurement). Describe comparability of assessment methods if there is more than one group<br>The diagnostic criteria was obtained from the reference; National Institute for Health and Clinical Excellence. Nutrition support in adults. CG32, London, England.                                                                                                                                                                                                                                                                                                                                                                                                                                                                                                                                                                                |

## Bias

- 9 **The authors accept that the results have a limited external validity due to the inherent bias of the narrow selection criteria. However, this is offset by the focus of the study which aimed to recruit participants commenced on artificial nutrition support.**

**The results are limited by the diagnostic criteria used which has not previously been reported.**

**The selection bias effect and exclusion of participants who were able to eat offers a viable explanation for the low occurrence of refeeding syndrome reported. A large number of potentially eligible participants could not be recruited due to difficulty obtaining consent. Some patients, particularly those on intensive care and high dependency were seriously ill including some were close to death. Therefore obtaining consent or assent from these individuals was problematic. Some of these potential participants died within 24 hours of commencing artificial nutrition support.**

**The causes of death have been documented however since death occurred within 24 hours of starting artificial nutrition support we cannot exclude complications associated with refeeding syndrome in these individuals. Some of these complications may have resulted in confusion, communication impairment and cognitive problems. Whilst the authors are unable to provide evidence in these un-recruited individuals there is the possibility that these severely ill individuals refused consent as they perceived participation in this study to be of limited benefit to their treatment or palliative care needs.**

**The diagnosis of only three participants limited the statistical analyses that we could perform and therefore regression analyses could not be performed.**

**The authors acknowledge that the low occurrence of refeeding syndrome may have been due to the medical teams taking preventative actions such as early electrolyte replacement. The authors did not influence electrolyte replacement and the benefit of this is that we were able to contrast current medical treatment of malnourished individuals to past reports of fatal outcomes.**

|                        |    |                                                                                                                                                                                                                                                                                                                                                |
|------------------------|----|------------------------------------------------------------------------------------------------------------------------------------------------------------------------------------------------------------------------------------------------------------------------------------------------------------------------------------------------|
| Study size             | 10 | The study size was calculated using the estimated reported occurrence of refeeding syndrome to be between 1 - 10% within an adult hospital population. A cohort of 240 participants was anticipated to produce between 2 - 24 positive cases of refeeding syndrome for analysis.                                                               |
| Quantitative variables | 11 | All participants were classified as having risk of refeeding syndrome or not at risk. Predictor variables were transformed to binary categories representing whether or not refeeding syndrome occurred. Sensitivity and specificity values for refeeding syndrome were calculated for each predictor based on the cohort of 243 participants. |

1  
2  
3  
4  
5  
6  
7  
8  
9  
10  
11  
12

Statistical methods 12 We used Fisher's exact test to compare groups at the  $p < 0.05$  level. Sensitivity and specificity analysis was conducted. The sensitivity level was 70%. We could not use multiple regression analysis due to the low number of positive cases of refeeding syndrome.

---

A subgroup of energy intakes were examined separately which were Group 1.  $< 800$  kcal day versus Group 2.  $> 800$  kcal day. This analysis allowed energy intake and risk factors to be analysed separately.

---

Missing data was not included in the analysis. Loss to follow up was not used.

## Results

13  
14  
15  
16  
17  
18  
19  
20  
21  
22  
23

Participants 13\* **Total eligible participants 484, total recruited 243, total not recruited 241, total positive refeeding cases 3, total borderline cases with electrolyte depletion 2, total recruited with risk factors for refeeding syndrome 133.**

---

Reasons for non recruitment were; previous treatment with artificial nutrition support, declined participation, unable to obtain consent/assent, tube feed stopped before recruitment, mortality, transfer from hospital and feeding tube removed, serum electrolyte concentrations not recorded,

---

A flow diagram is included to provide clarity of the research process, diagnosis process and totals used in the analysis.

24  
25  
26  
27  
28  
29  
30  
31  
32  
33  
34

Descriptive data 14\* (a) Give characteristics of study participants (eg demographic, clinical, social) and information on exposures and potential confounders

243 participants were recruited median age 57.0 years (interquartile range 44.0 – 69.0), sex 130 men. 133 participants had risk factors for refeeding syndrome of which 68 were men. 212 participants received enteral nutrition, 23 participants parenteral and 8 received enteral/parenteral tube feeding. Mortality during feeding was 13/243 and during admission 68/243 the cause of death was due to underlying disease. Mortality by location was ward 45/153, high dependency unit 14/46 and intensive care 9/44.

35  
36  
37

The major confounder was the organizational policy of early electrolyte supplementation which is addressed in the strengths and weaknesses section.

(b) Indicate number of participants with missing data for each variable of interest

38  
39  
40  
41  
42  
43

There was no missing data for diagnosis of refeeding syndrome.

All participants were assigned a risk factor for refeeding syndrome.

All participants were assigned a diagnostic criteria.

The data was complete for all 243 participants who received electrolyte supplementation and B vitamin supplementation.

44  
45  
46  
47  
48  
49

Outcome data 15\* *Cohort study*—Report numbers of outcome events or summary measures over time

243 participants recruited, 133 participants had risk factors for refeeding syndrome, 3 cases of refeeding syndrome were confirmed, 2 cases of borderline electrolyte depletion were recorded, 13 participants died during their participation in the study, 68 died during the hospital admission.

50  
51  
52  
53  
54  
55  
56

Main results 16 Give unadjusted estimates and, if applicable, confounder-adjusted estimates and their precision (eg, 95% confidence interval). Make clear which confounders were adjusted for and why they were included

We did not adjust for any confounders.

Precision was 70% for the sensitivity analysis and the 95% confidence interval levels have been included. .

57  
58  
59  
60

Other analyses 17 We have performed a subgroup analysis of energy intake. This analysis enabled us to confirm that the risk factors were uniformly distributed between the two groups.

---

**Discussion**


---

Key results 18 243 participants were recruited and 133 participants had risk factors for refeeding syndrome. Three participants developed refeeding syndrome despite receiving hypocaloric nutrition and preventative treatment to reduce the risk of the syndrome occurring. Occurrence of refeeding syndrome was difficult to predict which suggests that the risk factors used to predict the syndrome are weak predictors. Refeeding syndrome was a survivable phenomena with two participants admitted to the ICU and one treated on the ward.

The study objectives were achieved. The primary outcome of occurrence of the refeeding syndrome was determined. The secondary outcome of sensitivity and specificity of the risk factors for predicting refeeding syndrome were determined. The tertiary outcome of mortality due to refeeding syndrome was found to be weak.

Limitations 19 The main limitation of this study was that only three cases of refeeding syndrome were diagnosed. This small number of cases severely limited the statistical analyses that we could perform. We could not separate the effect of the medical teams prescribing early electrolytes which may have reduced the occurrence of refeeding syndrome.

The electrolyte threshold values could be viewed as being too low to capture all cases. However, we determined that the chosen serum electrolyte thresholds would allow the researchers to confirm positive cases with complete confidence. The 157 participants that were not recruited represented a loss of data that might have influenced the results of this study. However, this aspect of none recruitment is a feature of all cohort studies.

A limitation of this study, and the literature base, is that we do not have a similar design study methodology to compare our results to. Our results indicate that the risk factors for predicting refeeding syndrome were weak and therefore the practice of slow, hypocaloric nutrition may increase the risk of malnutrition. However, we accept that our results are only relevant to the cohort studied within one institution and influenced by the decisions of the medical teams in that institution.

Our study raises the question for clinicians, should they take a preventative approach to feeding patients and continue to provide slow hypocaloric feeding? Or should they feed as normal and treat when symptoms of refeeding syndrome occur? A key finding of this research was that mortality due to refeeding syndrome can be prevented by early serum electrolyte replacement.

Interpretation 20 Occurrence of serum phosphate <0.5 mmol/L in this study was 3% at day one and 6% at day three which was higher than that reported in a general adult hospital population of 0.2% to 2%. This may have been due to the cohort containing a sample of participants from HDU and ICU. Very few participants developed severe electrolyte shifts although moderate serum concentrations of potassium, phosphate and magnesium occurred. The interpretation of the moderate electrolyte shifts, without symptoms of the syndrome, was cellular uptake of electrolytes in response to nutritional input. The subgroup analysis identified many participants with malnutrition profiles for the syndrome. Hypocaloric nutritional treatment may have prevented refeeding syndrome in some of these participants. However, the subgroup analysis revealed one group received more energy sooner and for longer but did not develop

1 symptoms. This finding supports our interpretation that the risk factors for  
 2 predicting the syndrome are weak and the practice of hypocaloric feeding may  
 3 contribute to malnutrition.  
 4

5  
 6 The impact of intravenous dextrose infusion as a precipitating factor for  
 7 refeeding syndrome in the three cases cannot be under estimated. In starved  
 8 individuals gluconeogenesis is the predominant metabolic pathway for energy  
 9 production. Infusion of intravenous dextrose in the three participants caused  
 10 suppression of gluconeogenesis and a switch to glycolysis. This switch caused  
 11 insulin to be released causing rapid cellular uptake of serum phosphate,  
 12 potassium and magnesium electrolytes. We propose that the initial infusion of  
 13 dextrose in the three starved participants was the causal agent that triggered  
 14 the refeeding syndrome. Hypocaloric feeding failed to prevent refeeding  
 15 syndrome in these three cases for one important reason, it continued the input  
 16 of simple carbohydrates causing more insulin to be released. This explanation  
 17 is supported by other studies where intravenous dextrose infusion was  
 18 attributed to hypophosphataemia of  $<0.7$  mmol/L which progressed to  
 19 respiratory failure at serum phosphate concentration 0.2 mmol/L - 0.36  
 20 mmol/L. The results of the present study indicate that dextrose infusion should  
 21 be avoided in starved individuals who require fluid replacement and  
 22 nutritional treatment. The finding that intravenous dextrose infusion act as a  
 23 precipitator for the refeeding syndrome requires further research.  
 24  
 25  
 26

27 However, in cases where there is a clear history of chronic starvation repeat  
 28 serum electrolyte replacement may be required during the first seven to ten  
 29 days of treatment.  
 30

31  
 32 The small number of positive cases severely limited the statistical analyses  
 33 that we could perform. This small number may have been due to the medical  
 34 teams taking preventative actions to avoid refeeding syndrome. However we  
 35 suspect that the most compelling reason for the low occurrence of refeeding  
 36 syndrome was that genuine chronic starvation was absent from the majority of  
 37 the cases that were recruited for this study.  
 38

---

39 Generalisability 21 The results are applicable to adults commenced on artificial nutrition support  
 40 for the first time. From a clinical importance the results are applicable to  
 41 dietitian, nutrition teams and pharmacists who prescribe nutrition via a tube  
 42 feed. From a clinical perspective we advise that individuals with a history of  
 43 chronic starvation receive repeat serum electrolyte infusion until serum levels  
 44 are stable.  
 45  
 46

47 In subjects with a history of fasting we suggest routine electrolyte replacement  
 48 as in the normal current practice.  
 49

---

#### Other information

50  
 51 Funding 22 Funding; none declared for this study.  
 52  
 53  
 54  
 55  
 56  
 57  
 58  
 59  
 60



1  
2  
3  
4  
5  
6  
7  
8  
9  
10  
11  
12  
13  
14  
15  
16  
17  
18  
19  
20  
21  
22  
23  
24  
25  
26  
27  
28  
29  
30  
31  
32  
33  
34  
35  
36  
37  
38  
39  
40  
41  
42  
43  
44  
45  
46  
47  
48  
49  
50  
51  
52  
53  
54  
55  
56  
57  
58  
59  
60

Flow chart 1. Flow chart showing number of participants at each stage of the study and stratification.

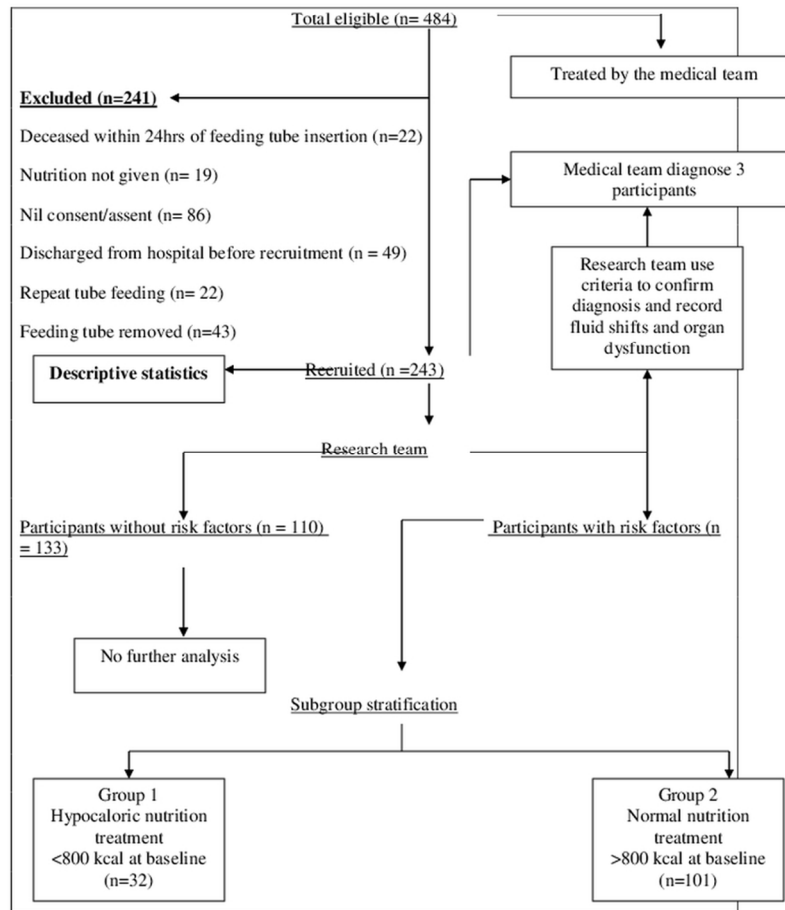

90x116mm (300 x 300 DPI)
